# Supplementary material for: Classification of the Biogenicity of Complex Organic Mixtures for the Detection of Extraterrestrial Life
Source: MDPI journal article supplement (doi:10.3390/life11030234), 2021-03-12
Supplement: s1 [file s1]

**Figure S1A.** Negative mode ESI FT-ICR-MS spectrum of organics extracted from cultured *E. coli* cells after heating in the dry state for six days.

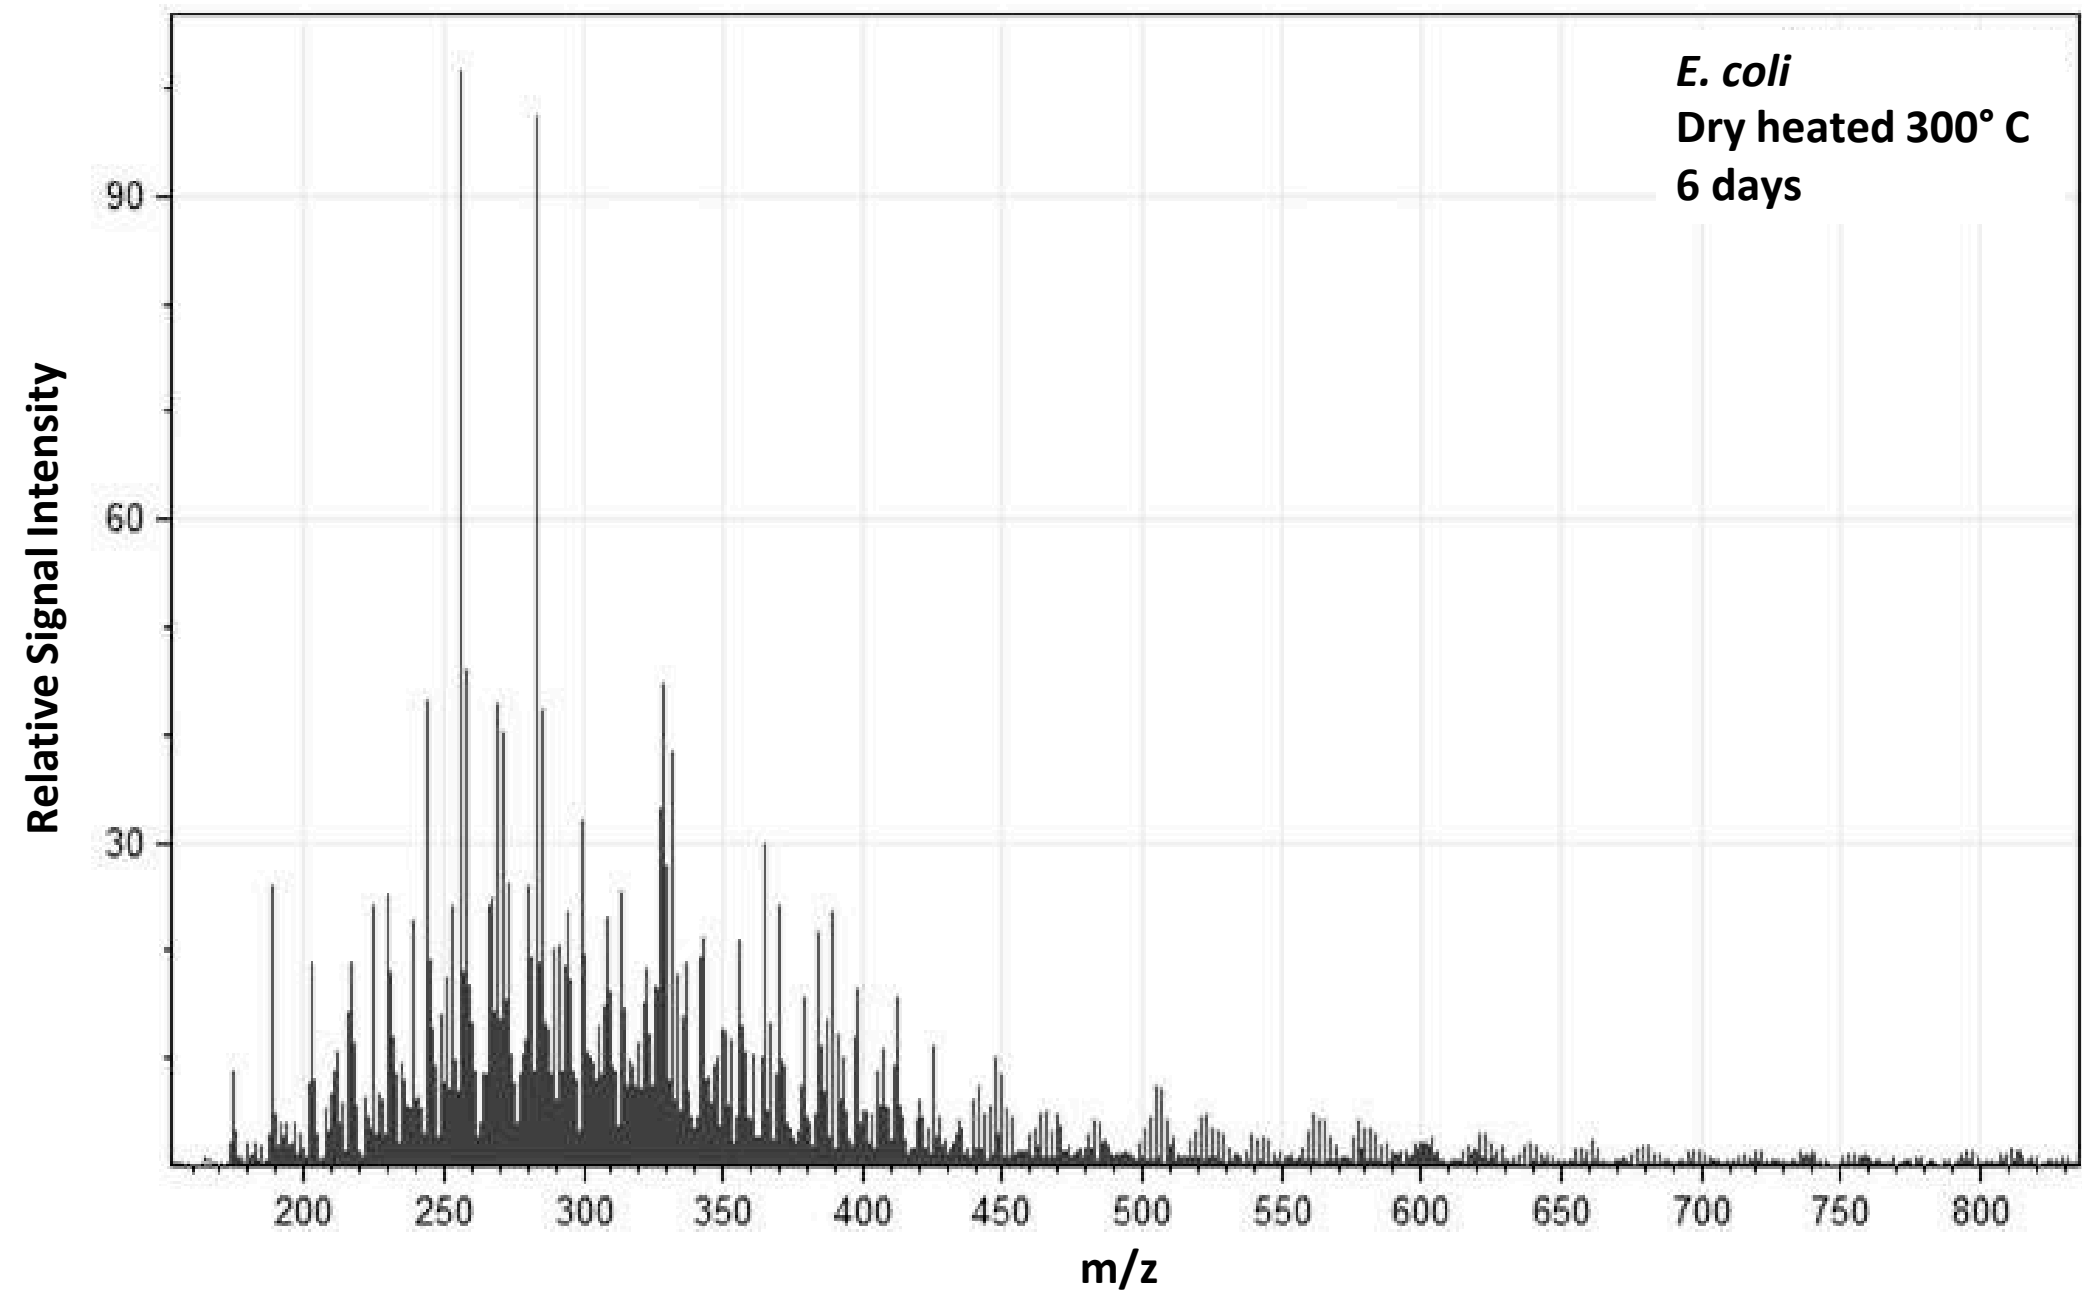

**Figure S1B.** Odd and even Kendrick Mass Defect plots of the organics extracted from cultured *E. coli* cells after heating in the dry state for six days.

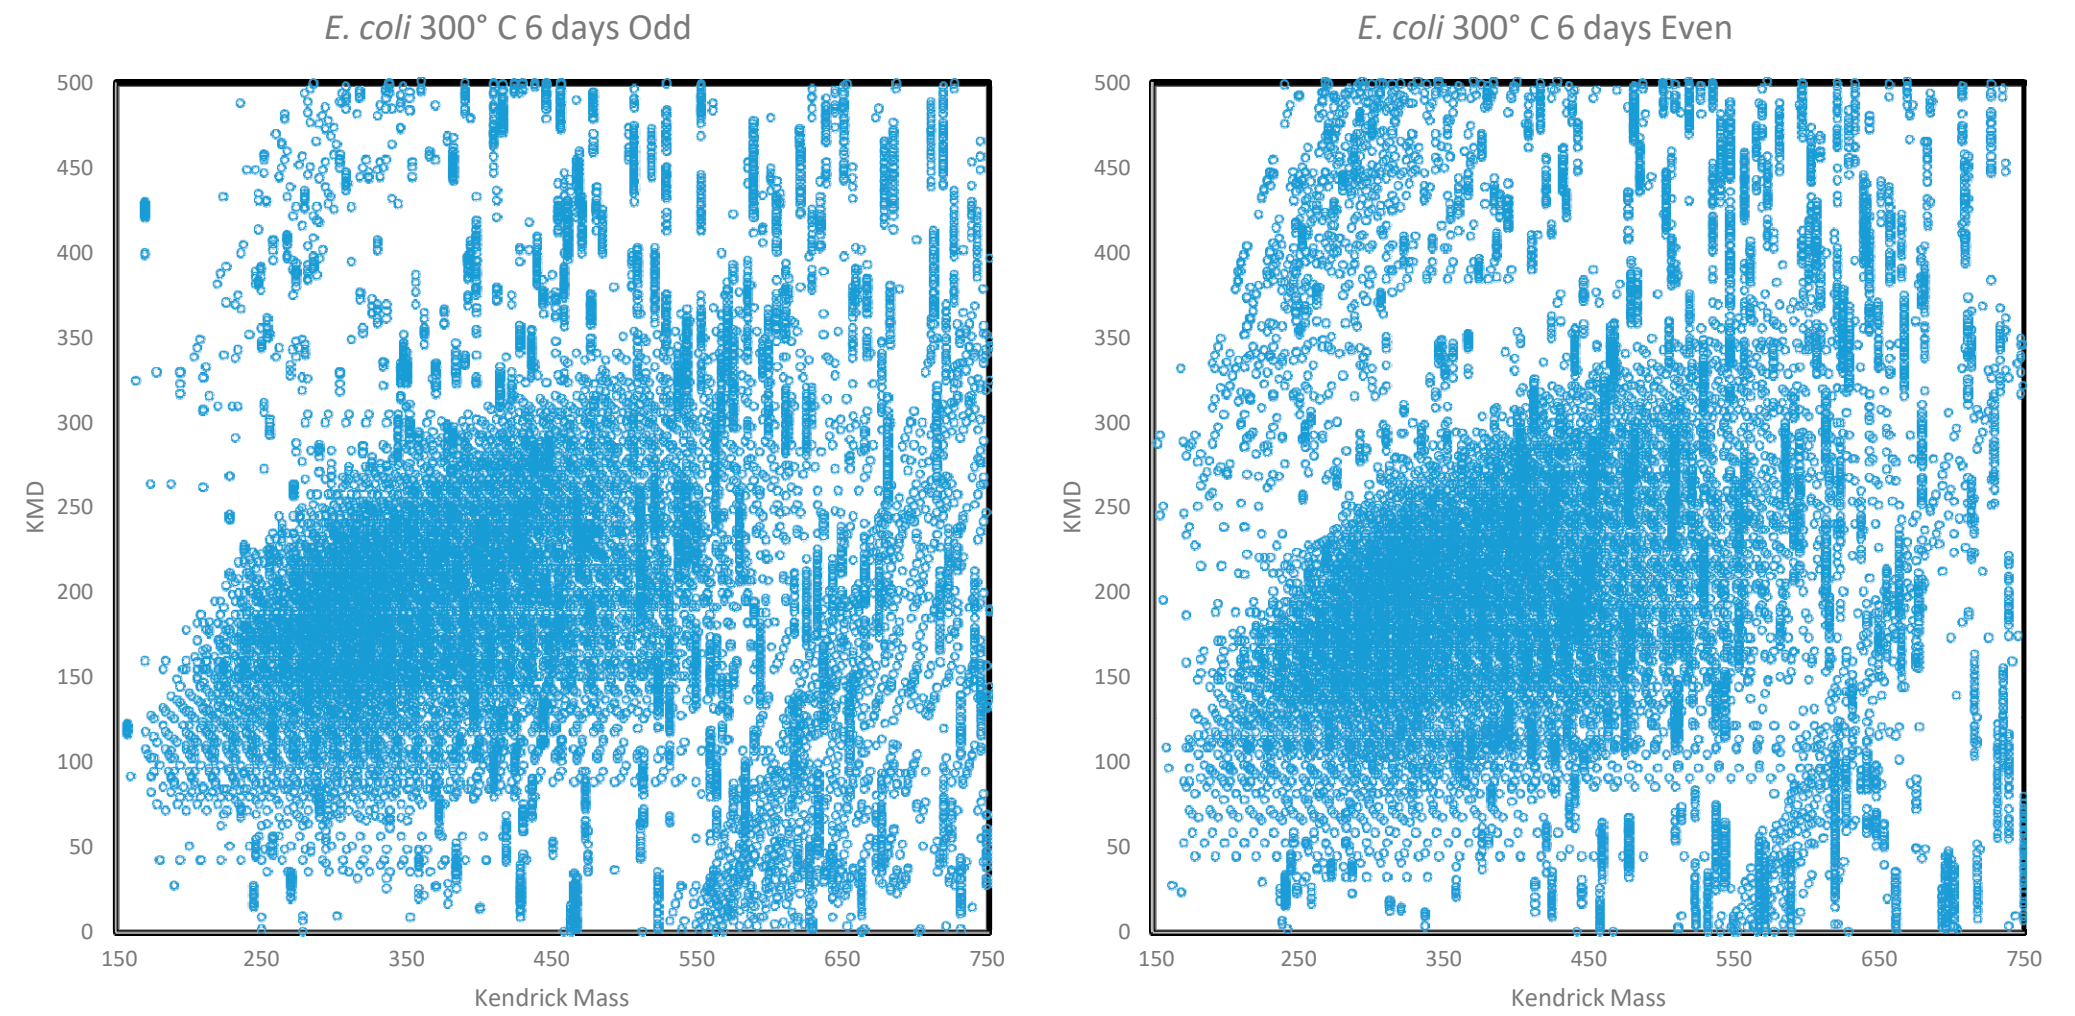

**Figure S2A.** Negative mode ESI FT-ICR-MS spectrum of organics extracted from cultured *E. coli* cells after heating in the dry state for four days.

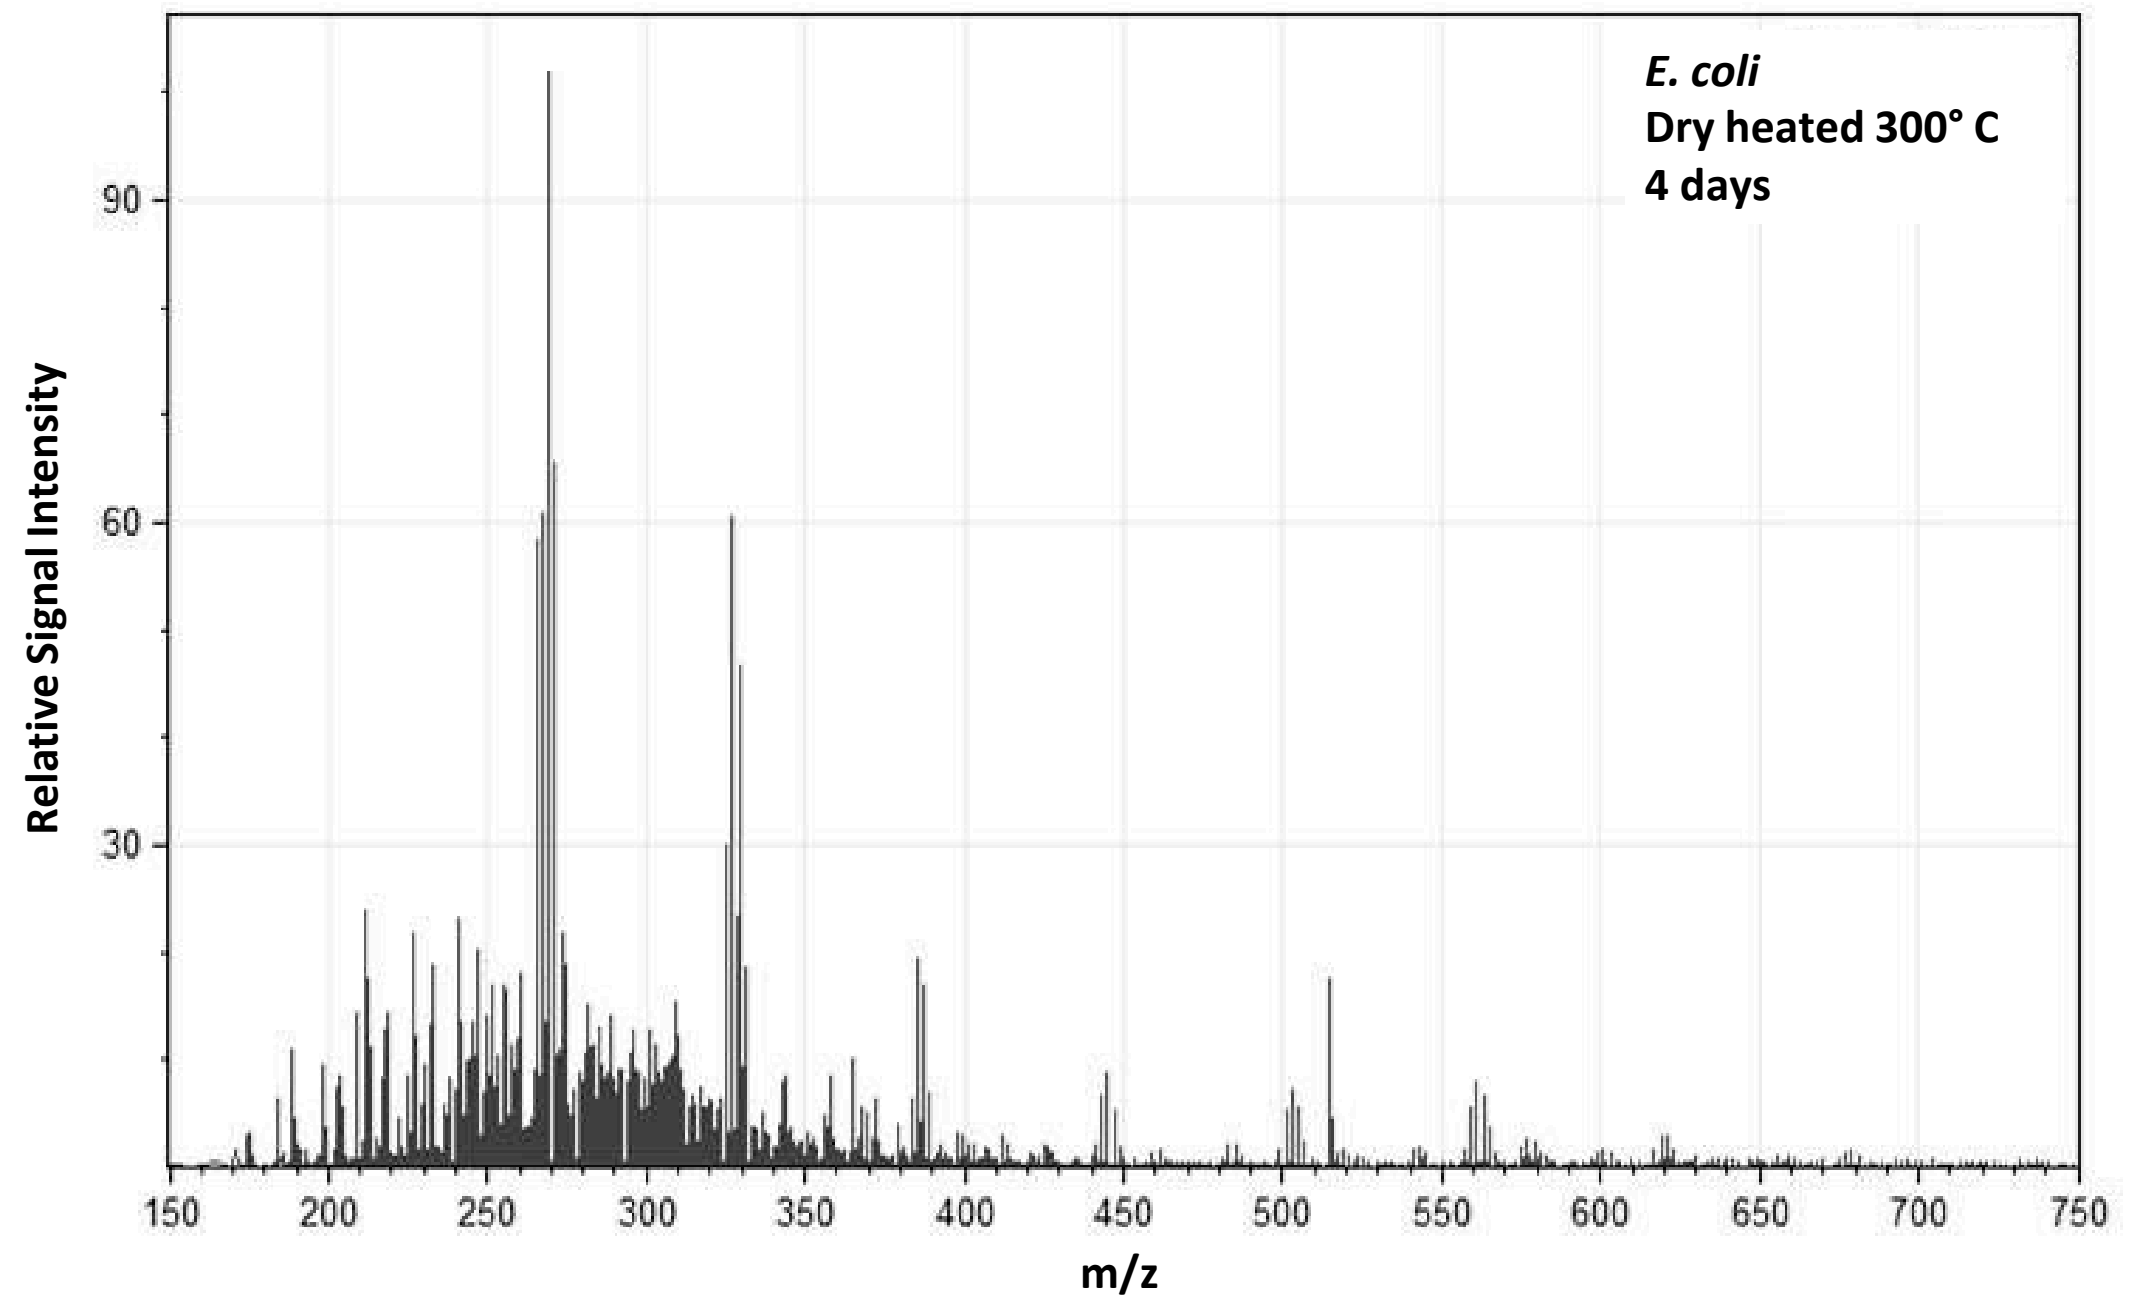

**Figure S2B.** Odd and even Kendrick Mass Defect plots of the organics extracted from cultured *E. coli* cells after heating in the dry state for four days.

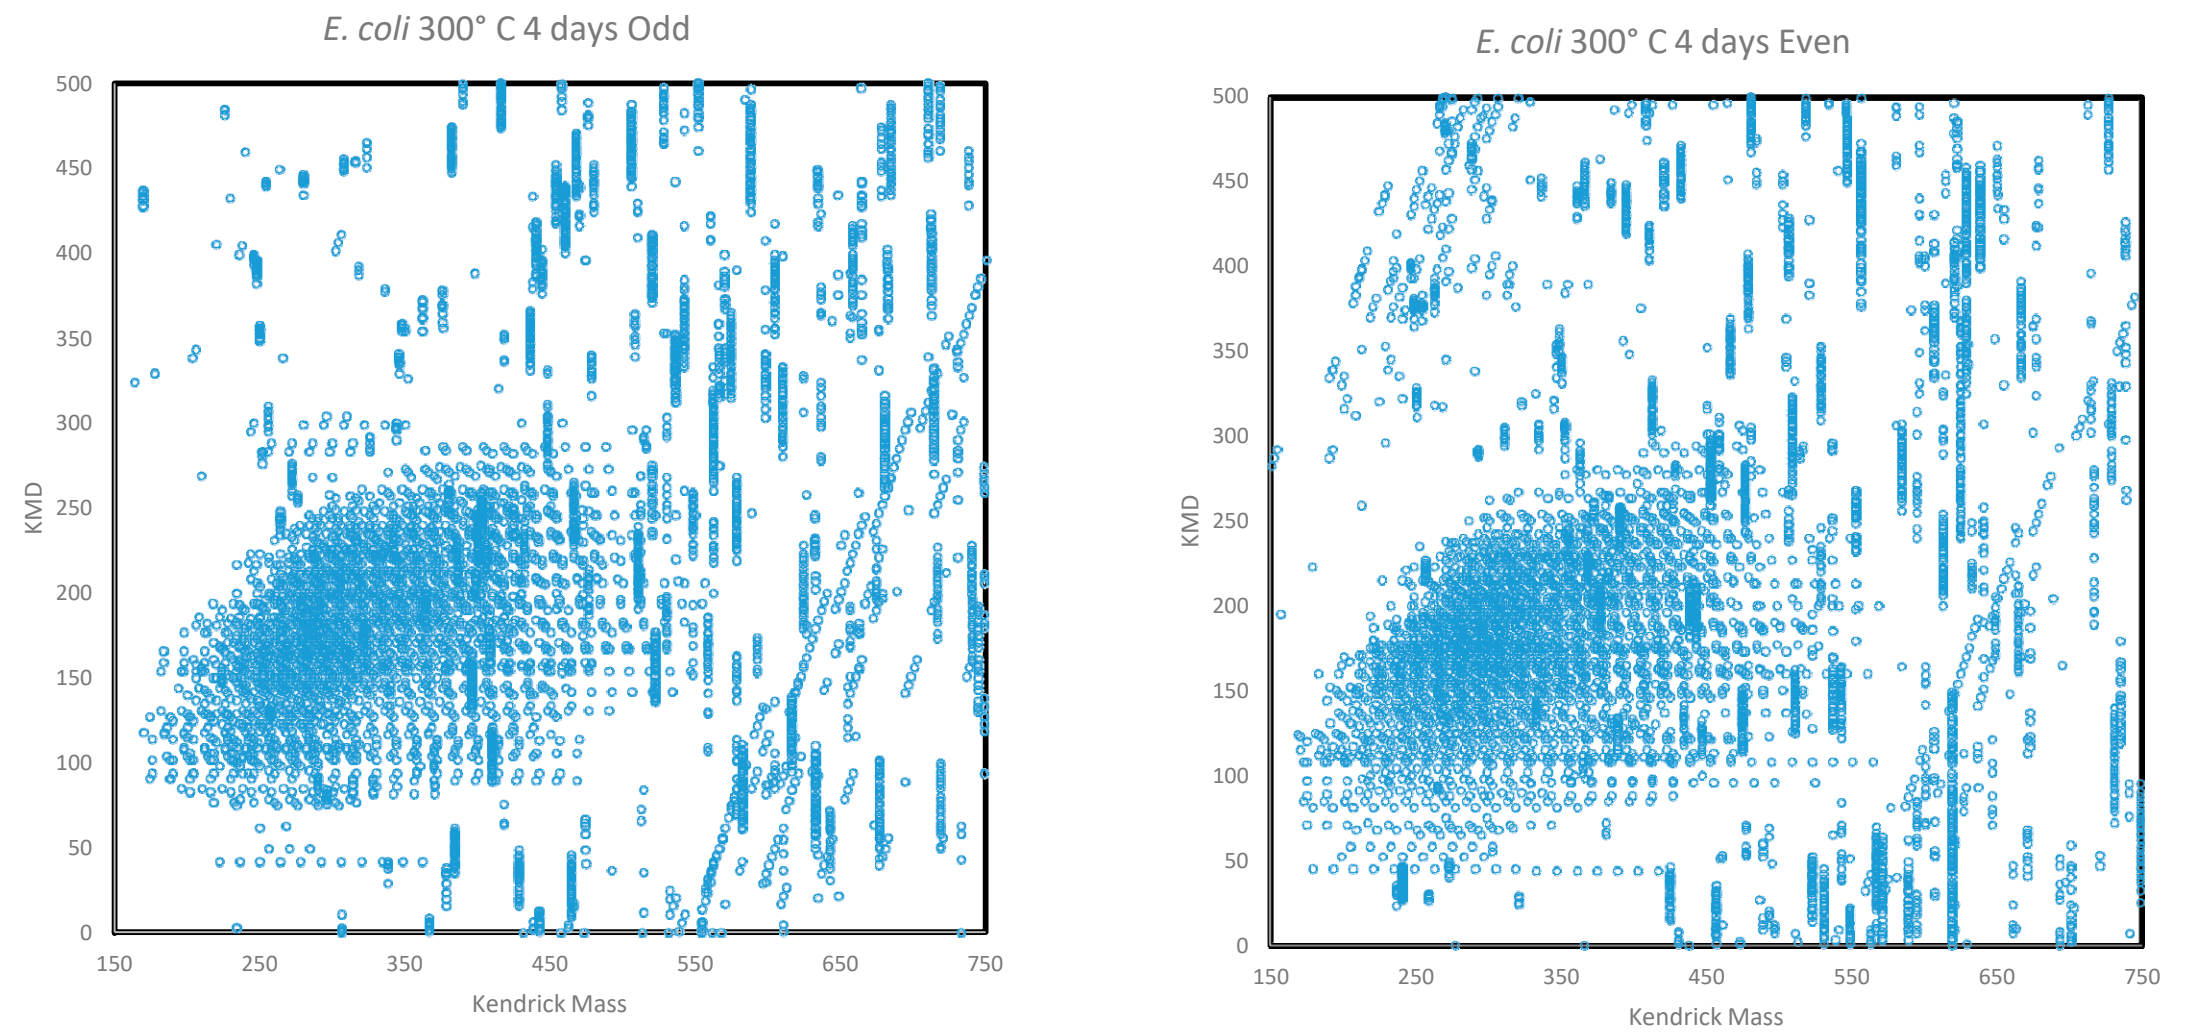

**Figure S3A.** Negative mode ESI FT-ICR-MS spectrum of organics extracted from the Orgueil meteorite using methanol as described in the methods section.

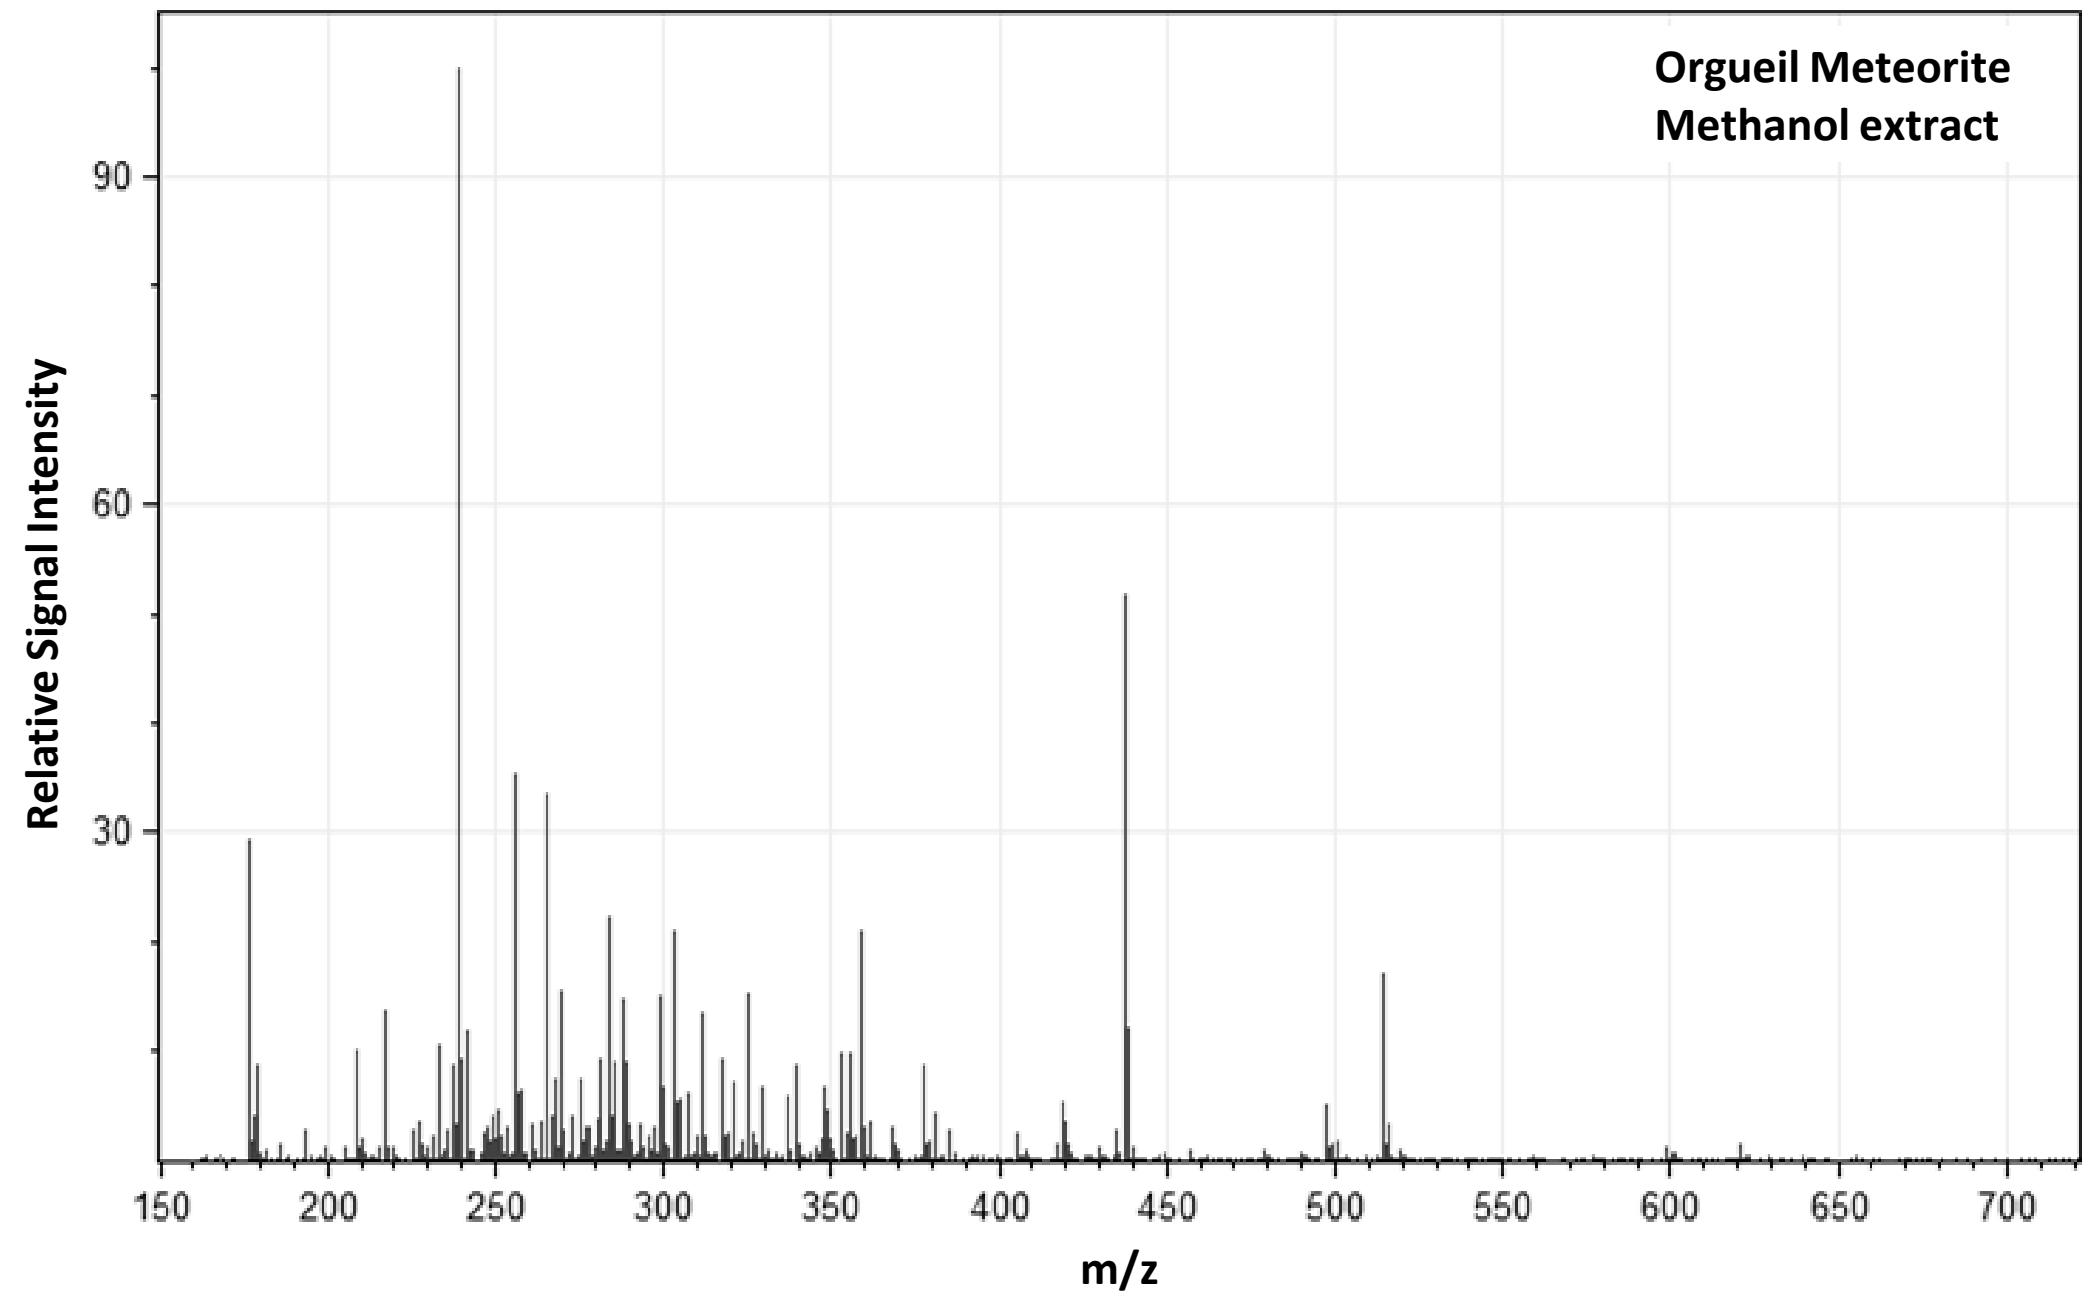

**Figure S3A.** Odd and even Kendrick Mass Defect plots of the organics extracted from the Orgueil meteorite using methanol as described in the methods section.

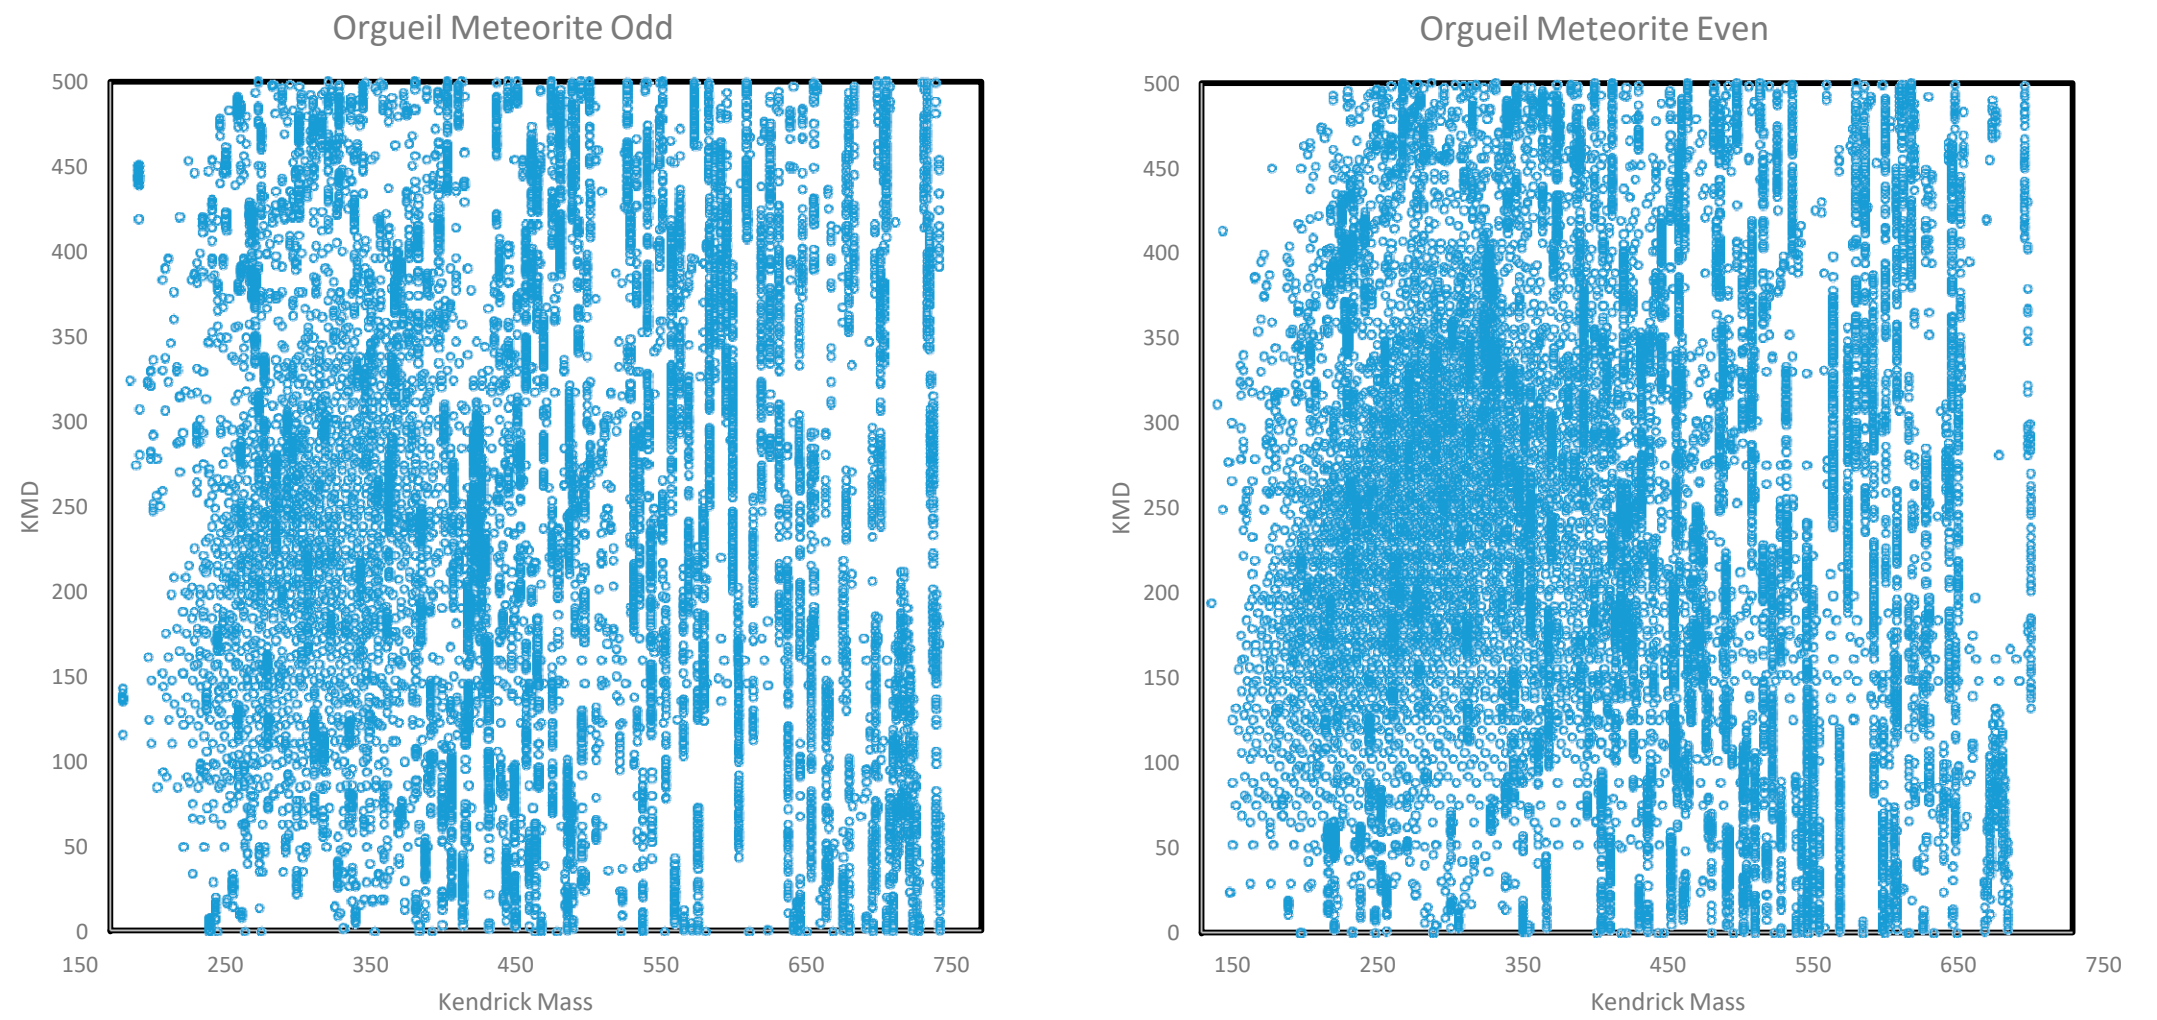

**Figure S4A.** Negative mode ESI FT-ICR-MS spectrum of organics extracted from the Allende meteorite using methanol as described in the methods section.

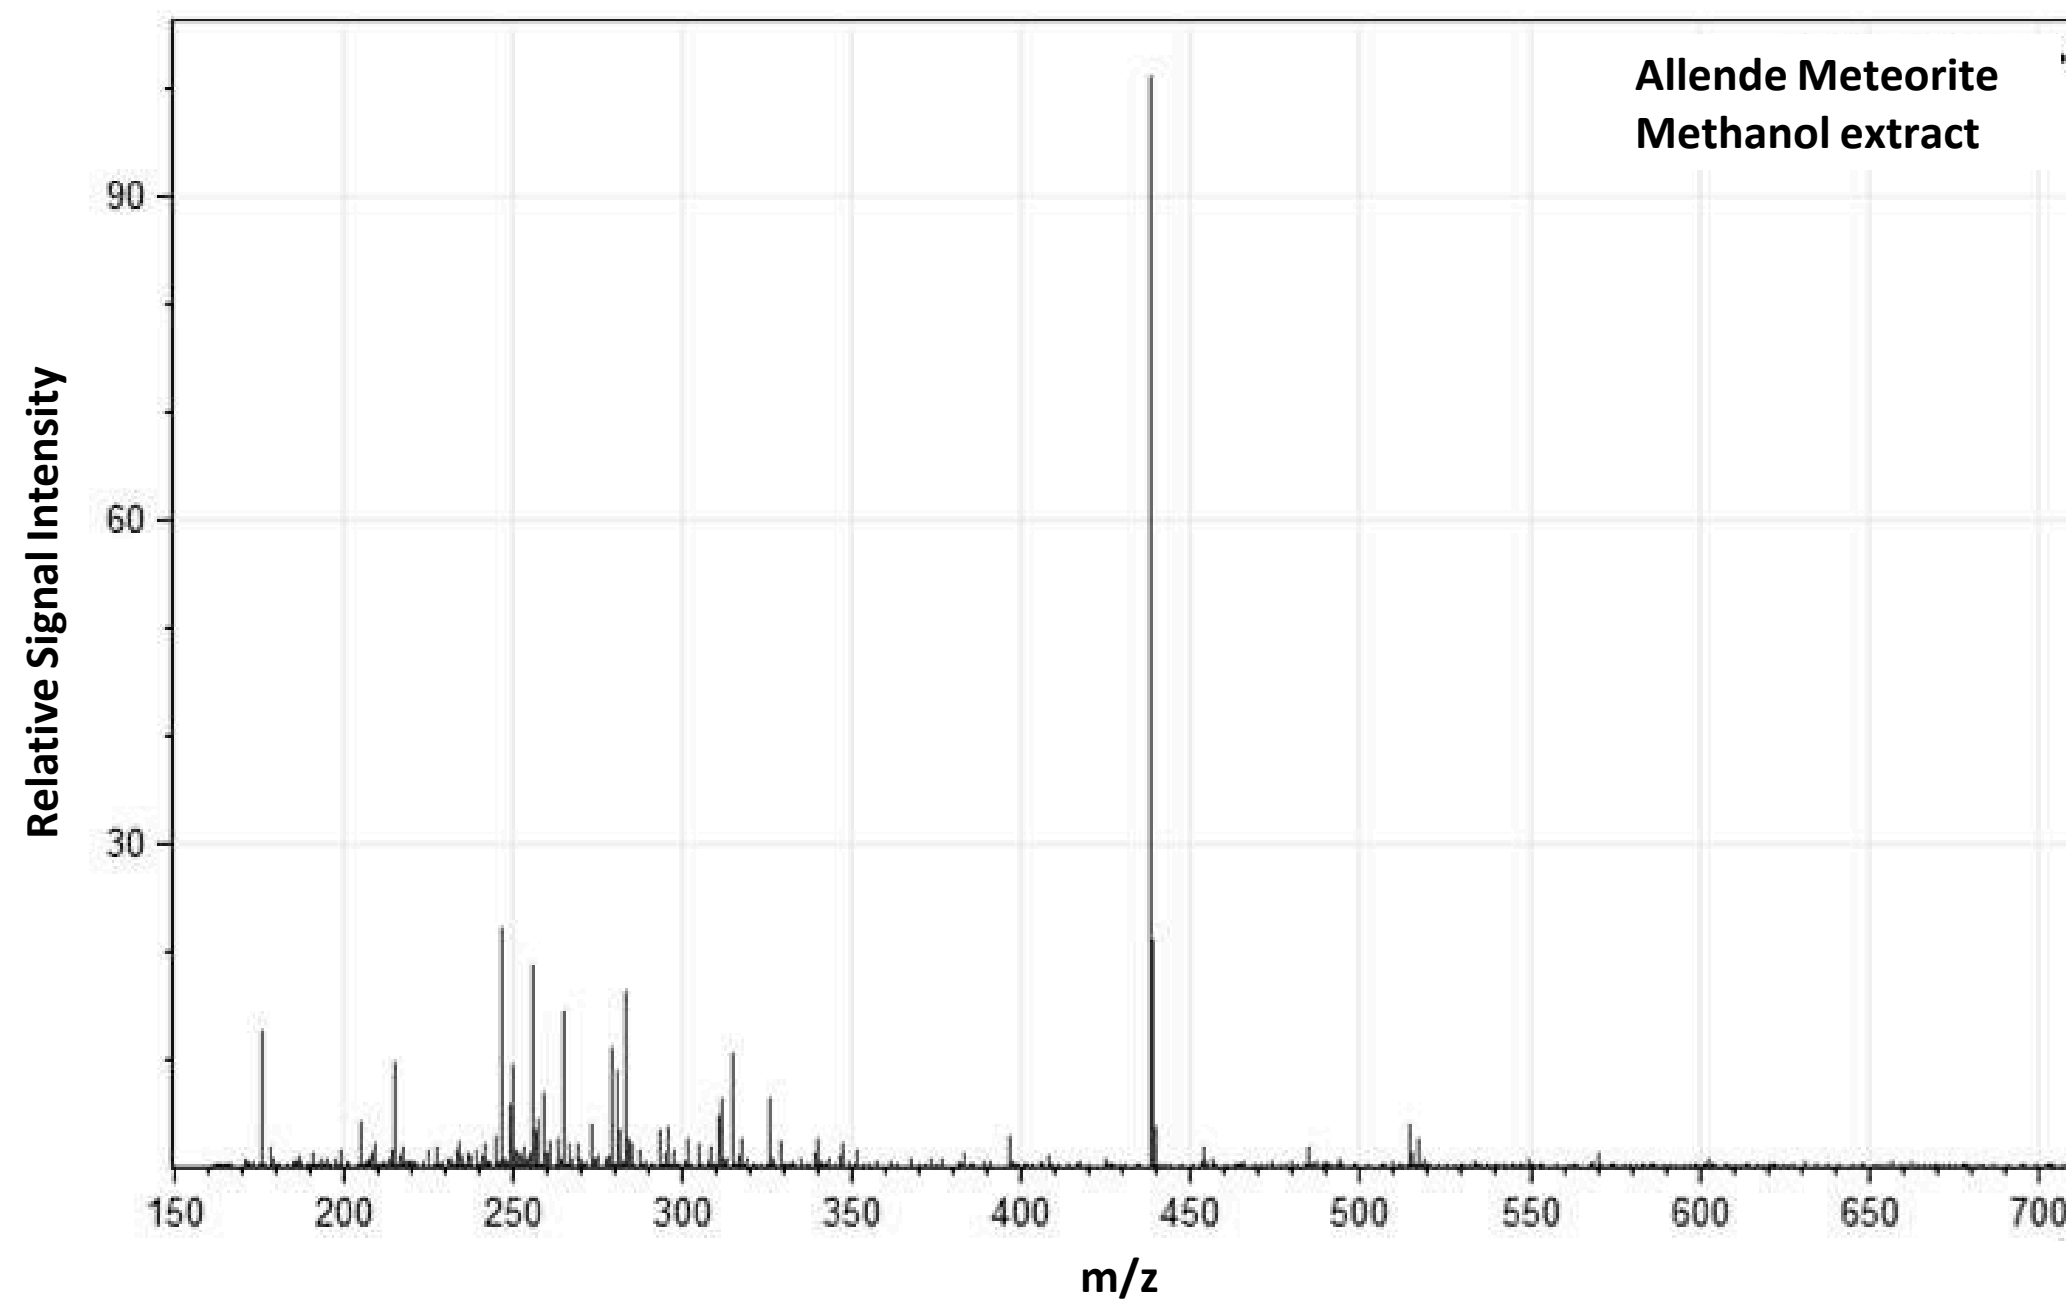

**Figure S4B.** Odd and even Kendrick Mass Defect plots of the organics extracted from the Allende meteorite using methanol as described in the methods section.

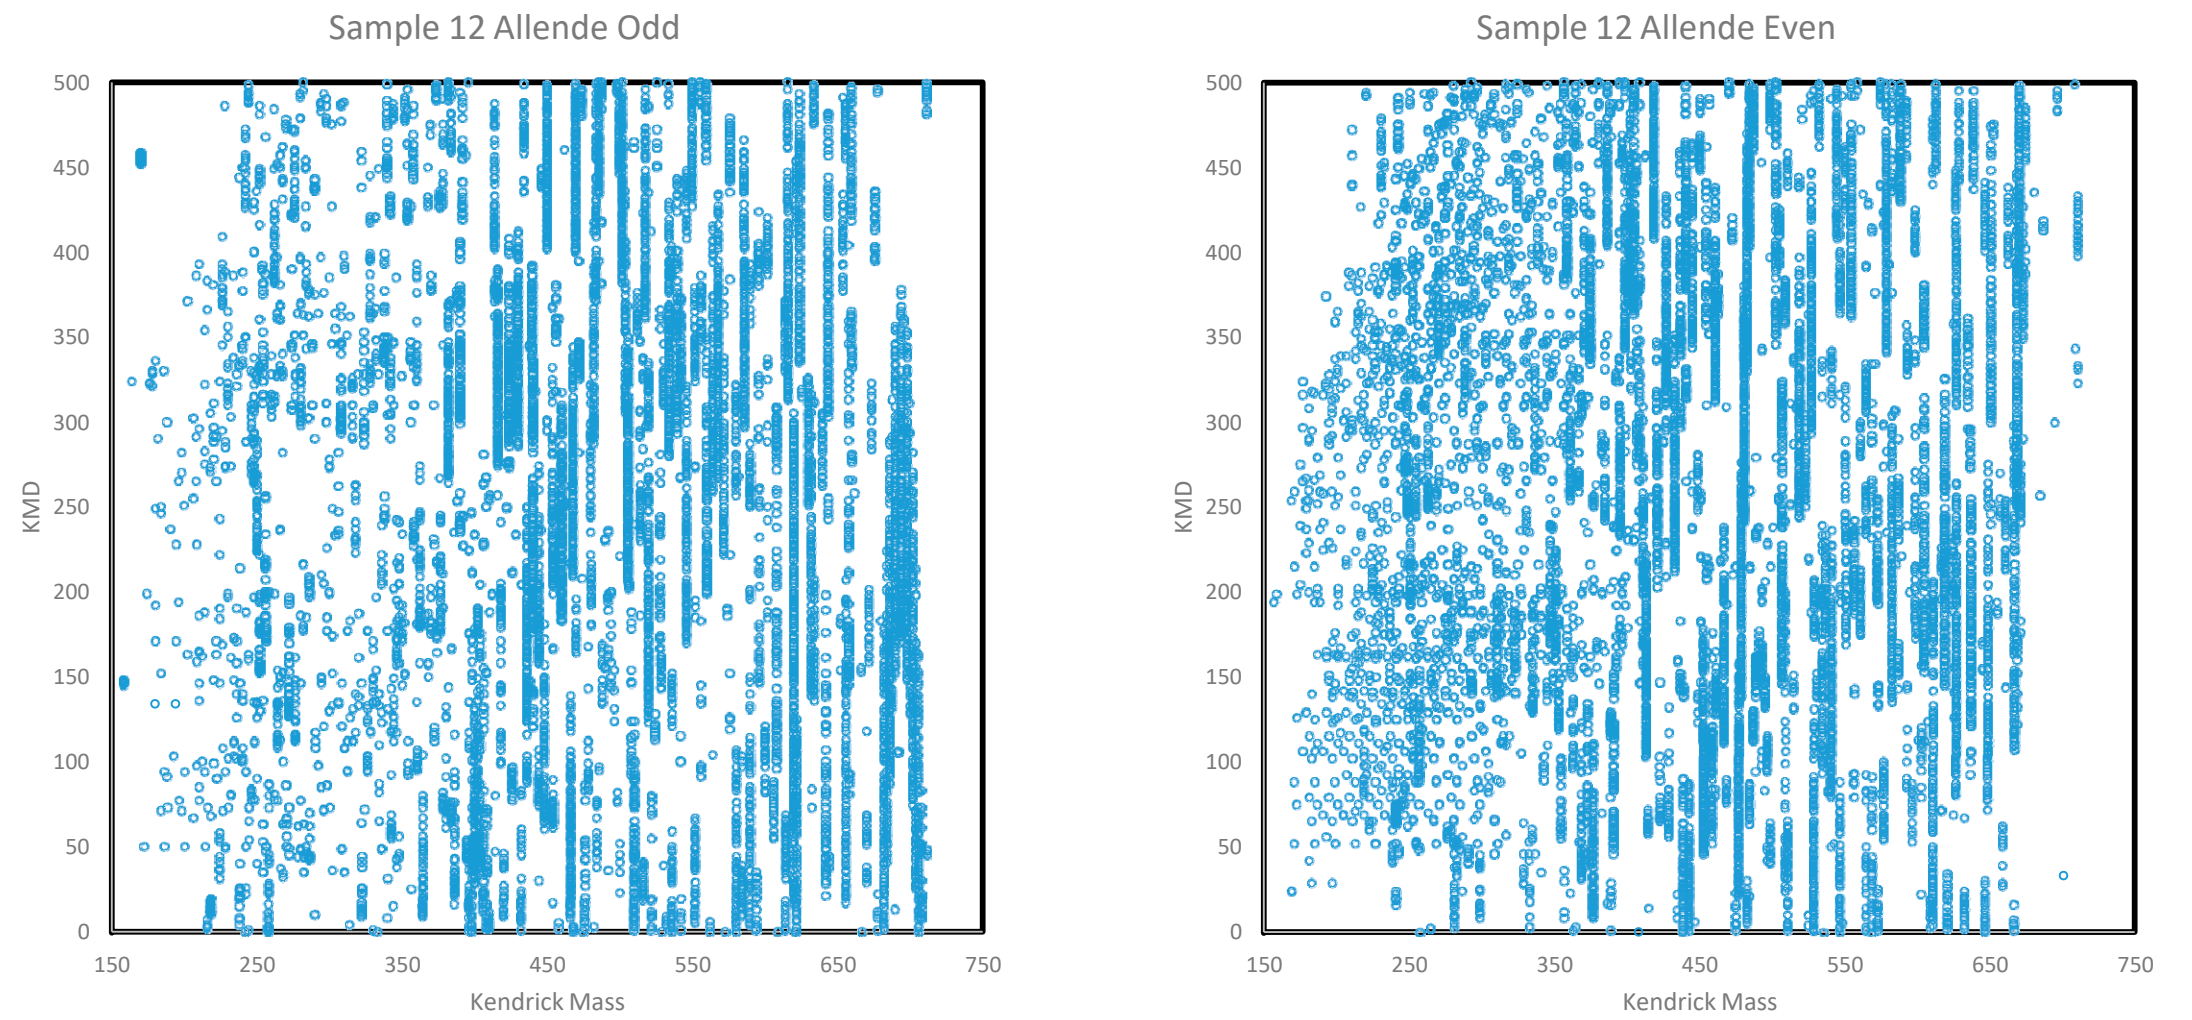



**Figure S5A.** Negative mode ESI FT-ICR-MS spectrum of organics extracted from the Murchison meteorite using methanol as described in the methods section.

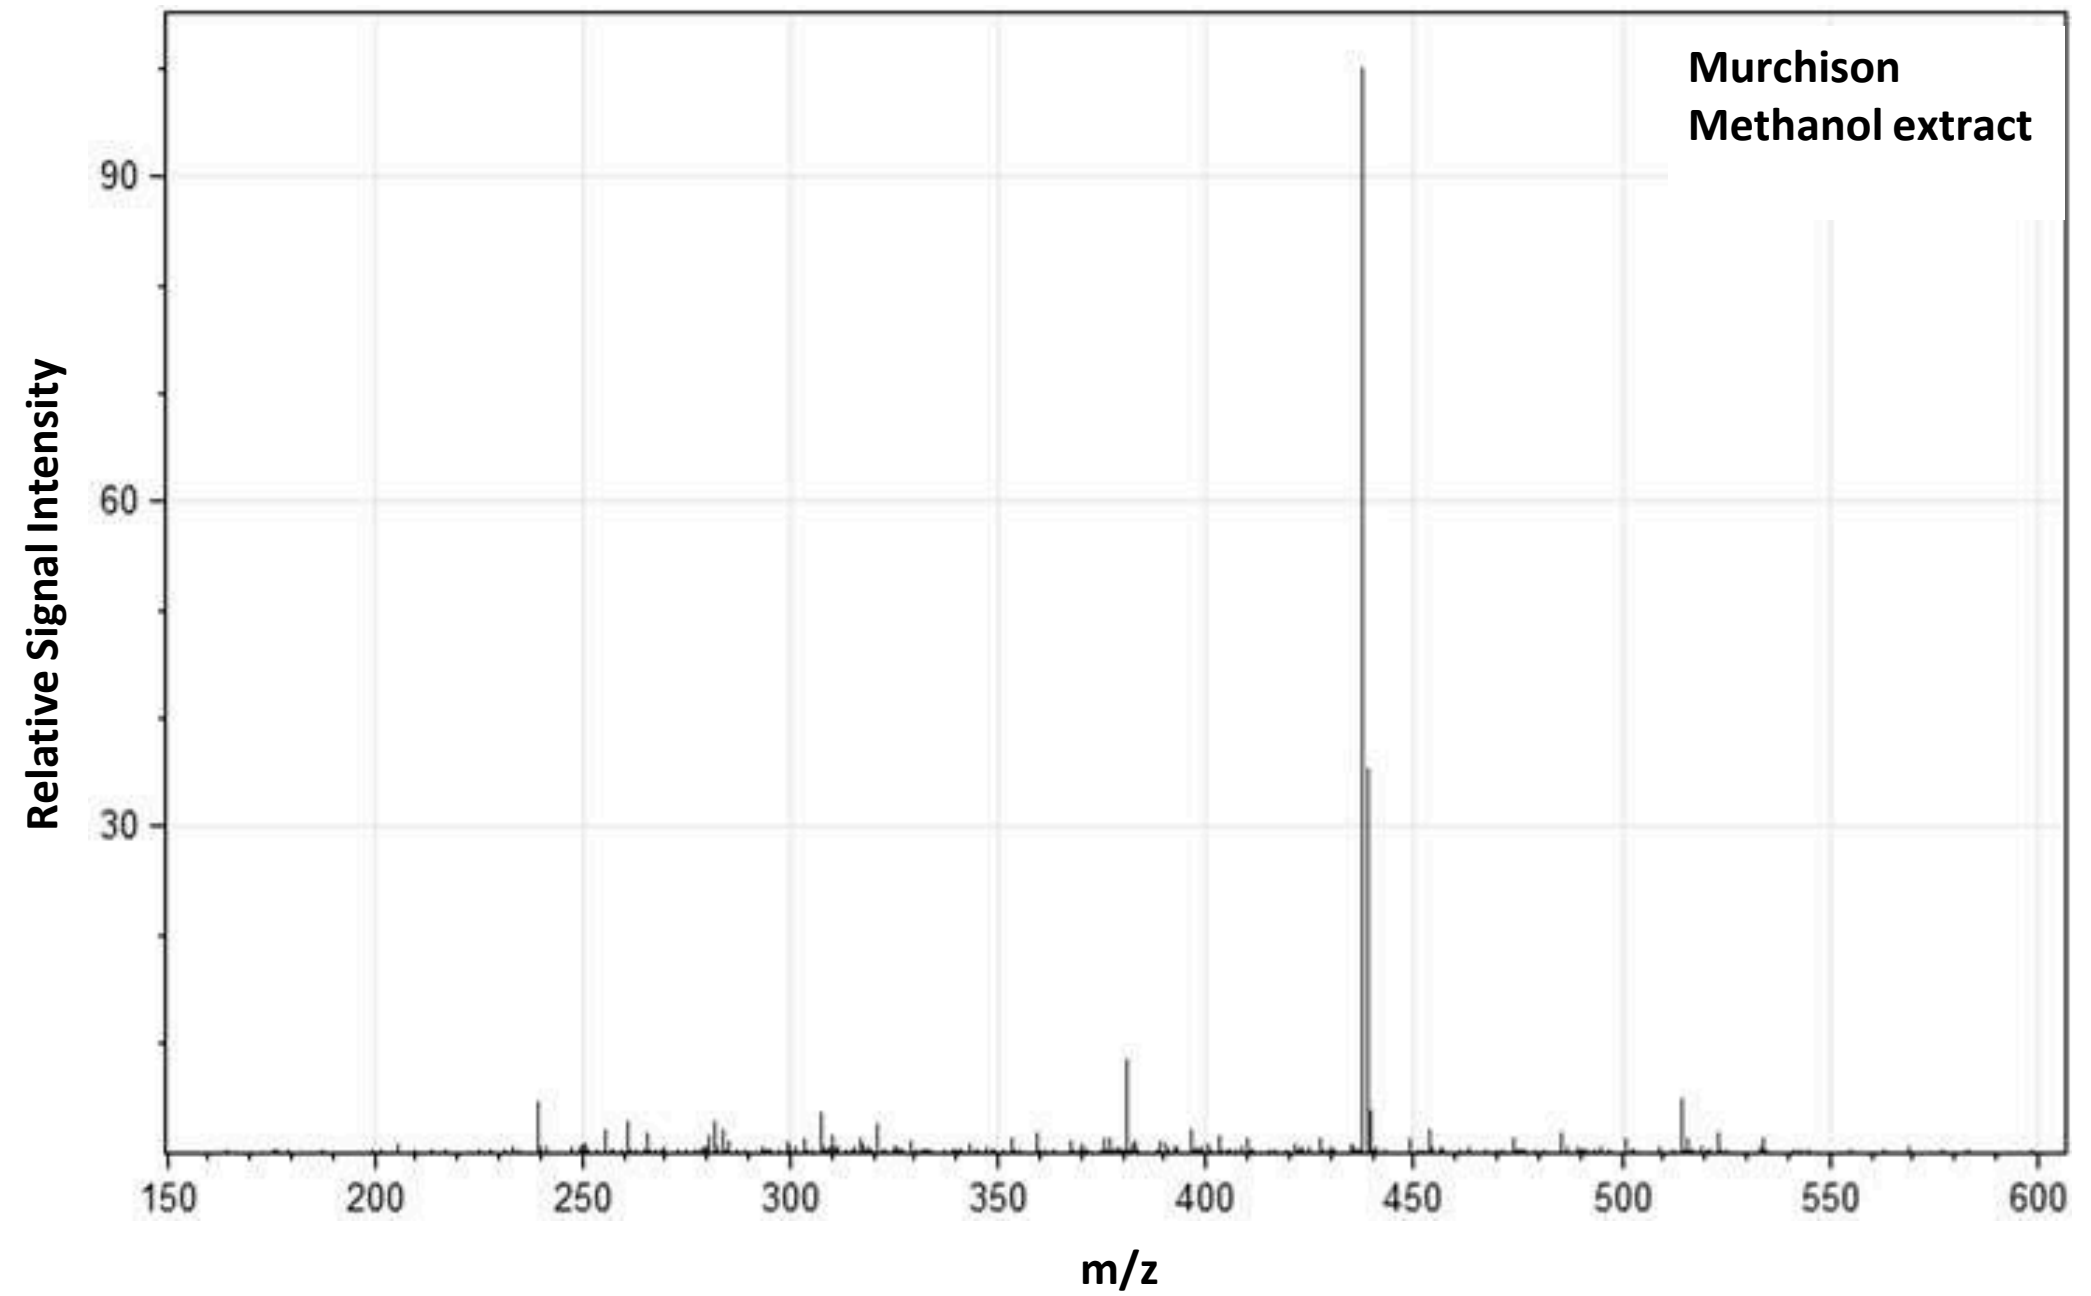

**Figure S5B.** Odd and even Kendrick Mass Defect plots of the organics extracted from the Murchison meteorite using methanol as described in the methods section.

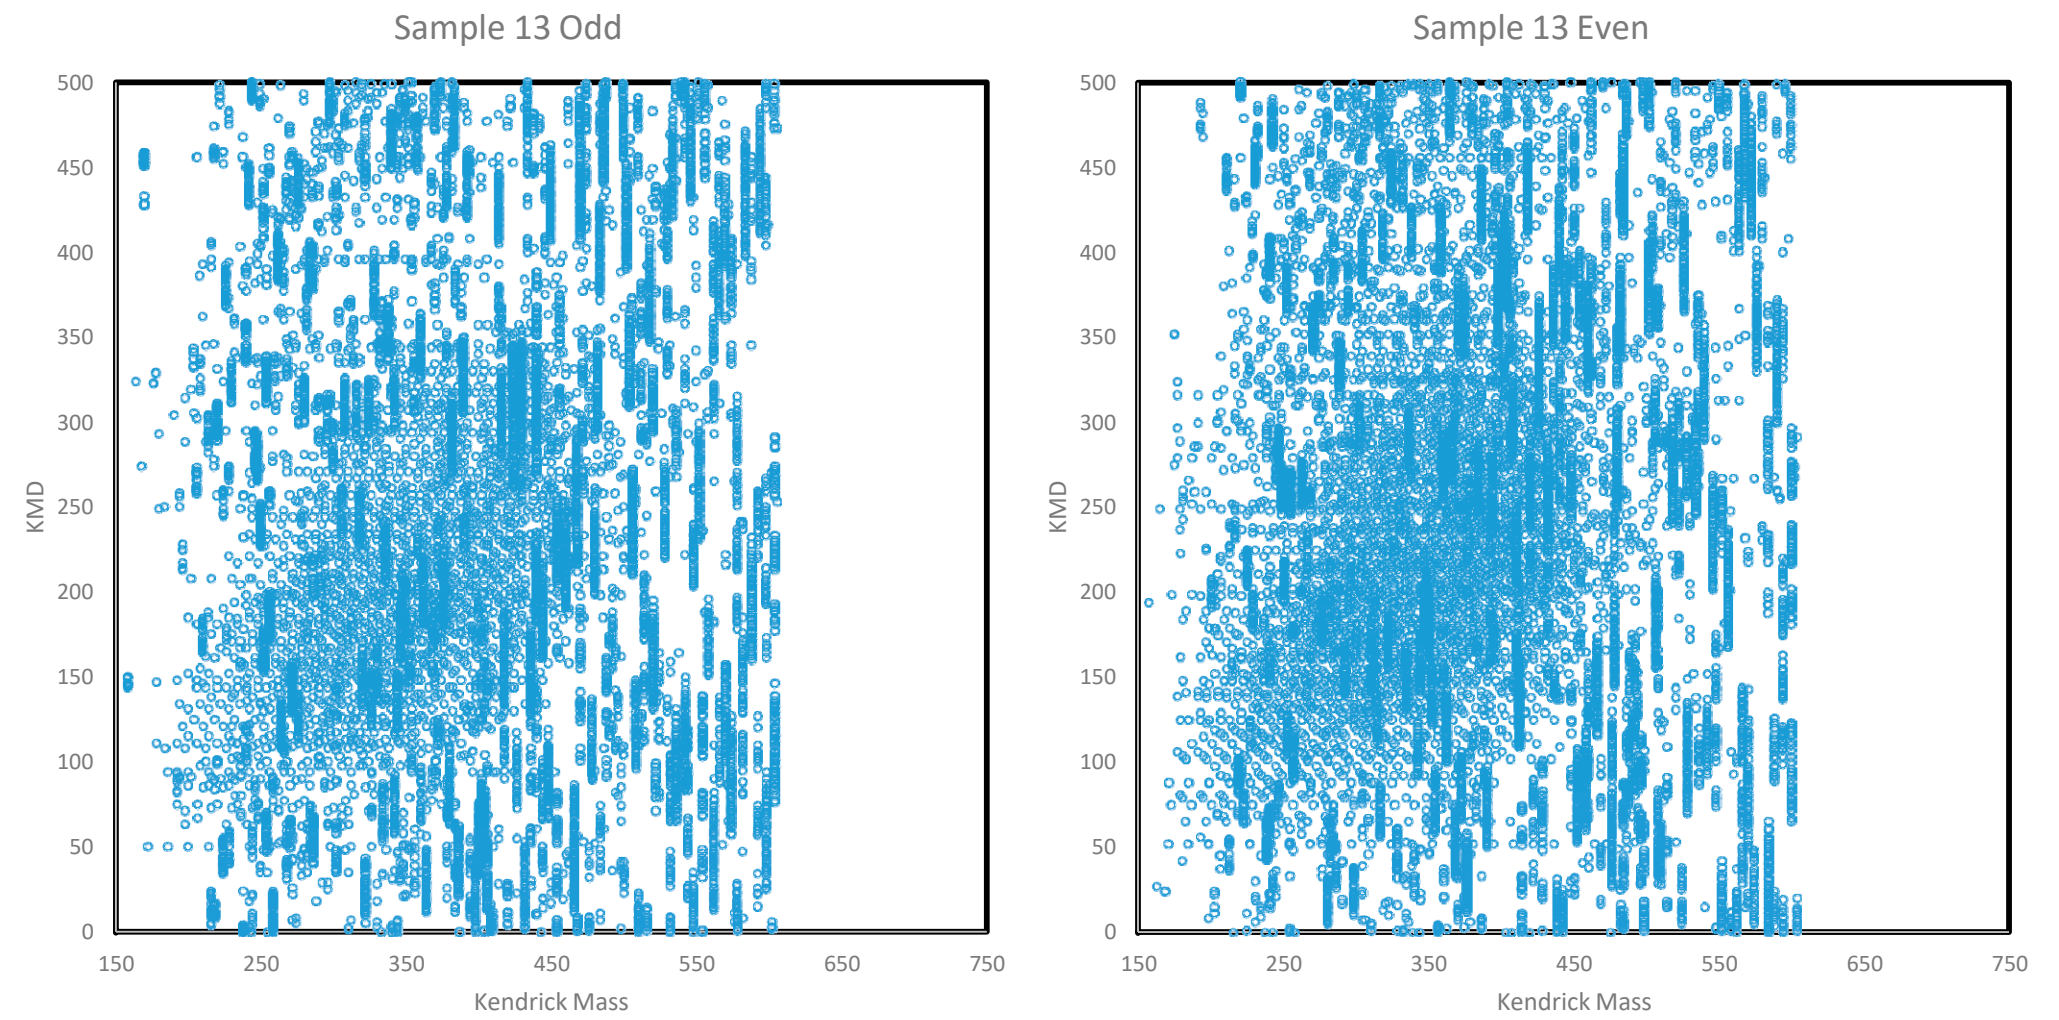

**Figure S6A.** Negative mode ESI FT-ICR-MS spectrum of organics extracted from cultured a marine hyperthermophilic Archeobacterium *Aeropyrum sp.*

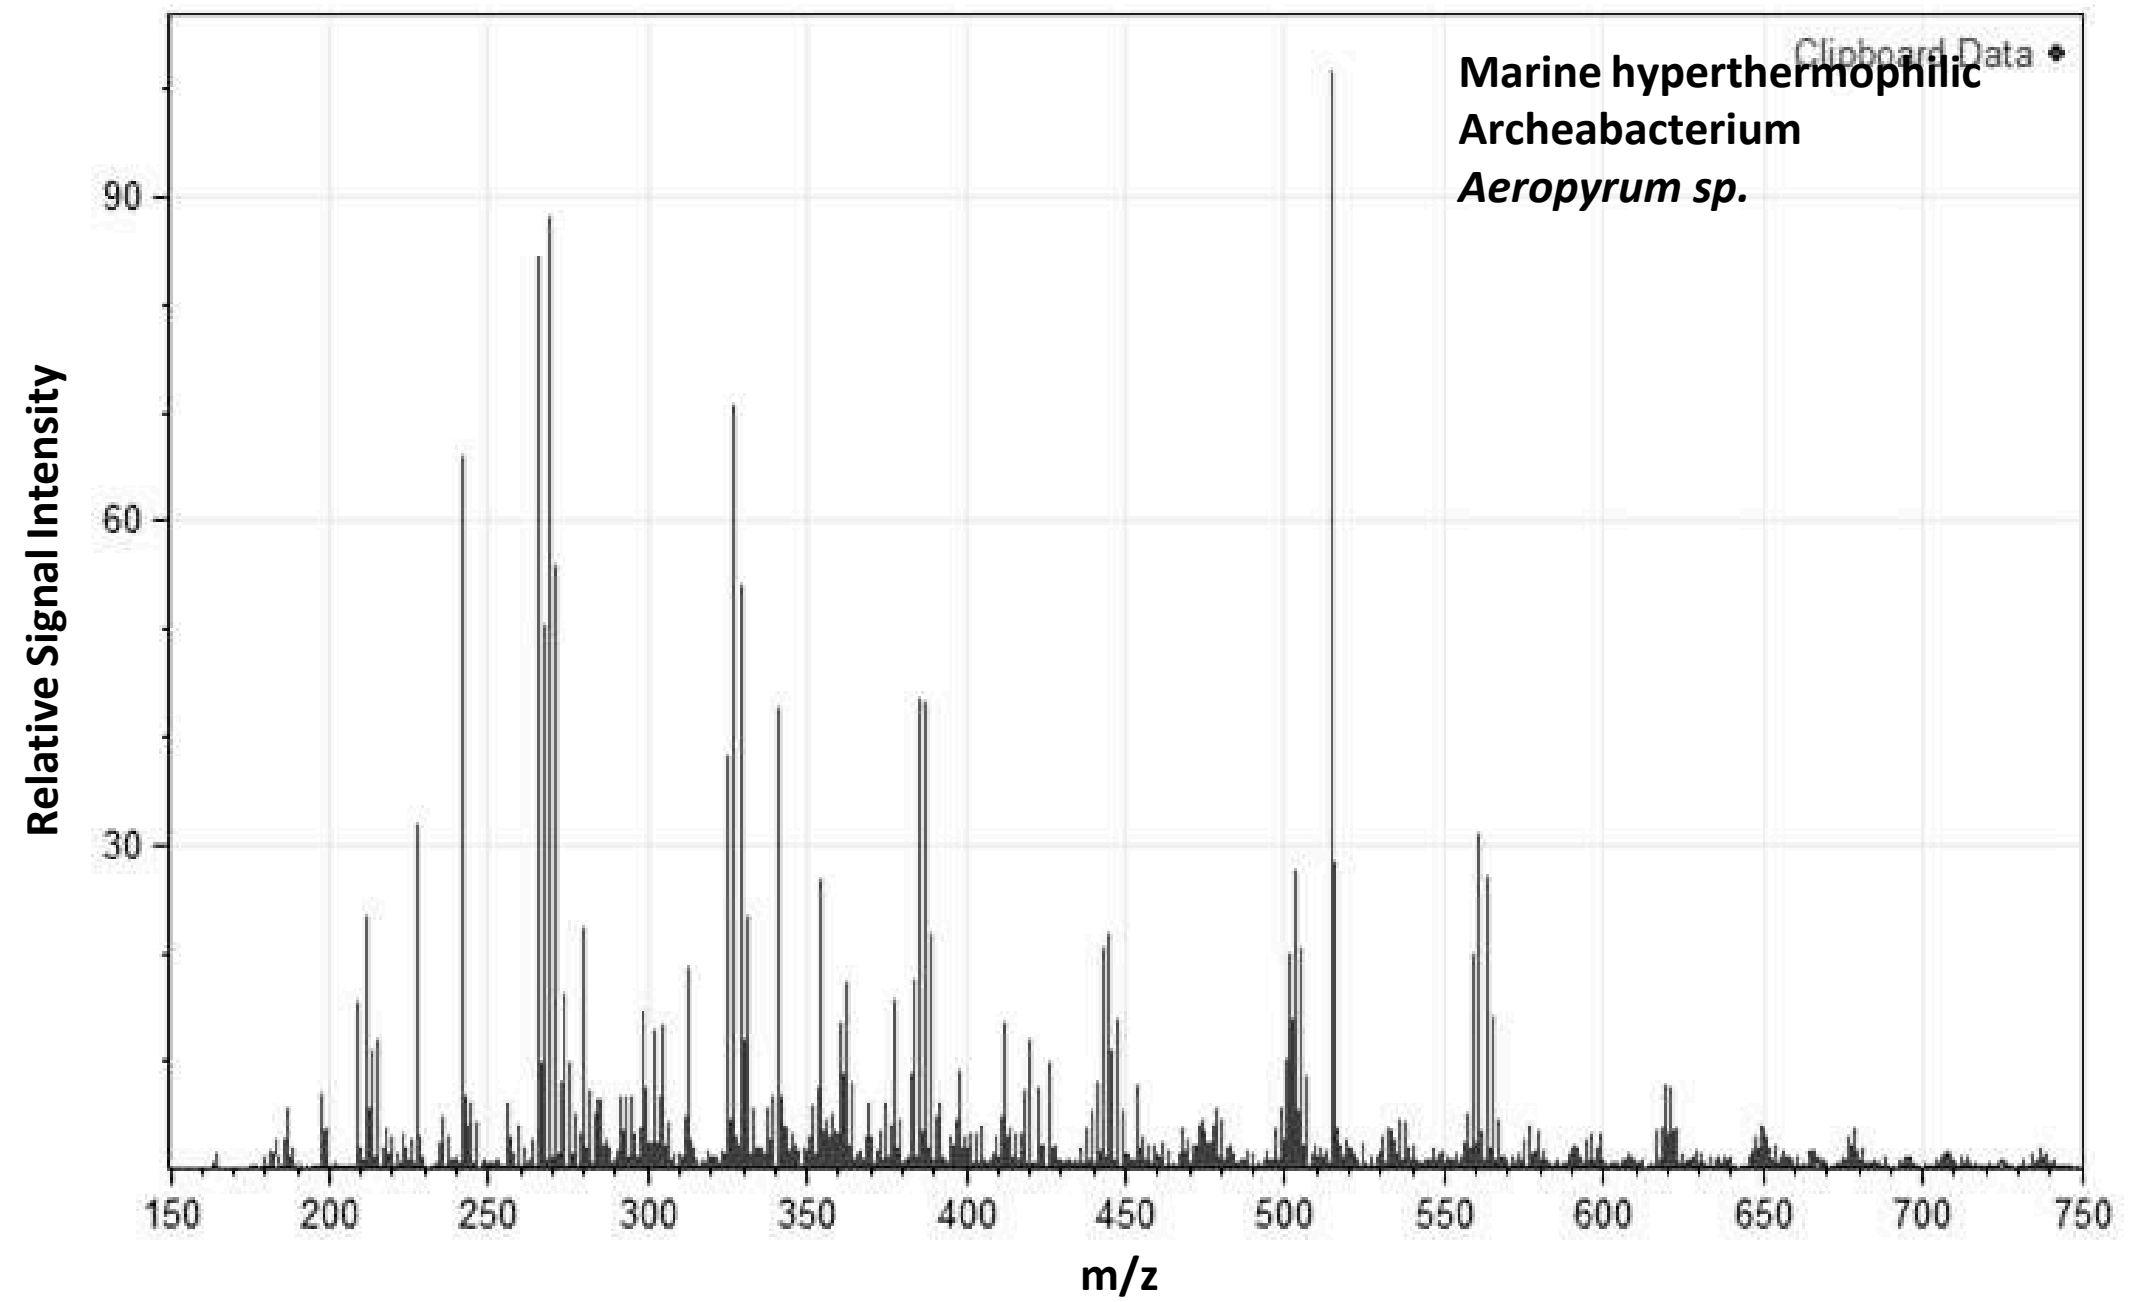

**Figure S6B.** Odd and even Kendrick Mass Defect plots of the organics extracted from cultured a marine hyperthermophilic Archeobacterium *Aeropyrum sp.*

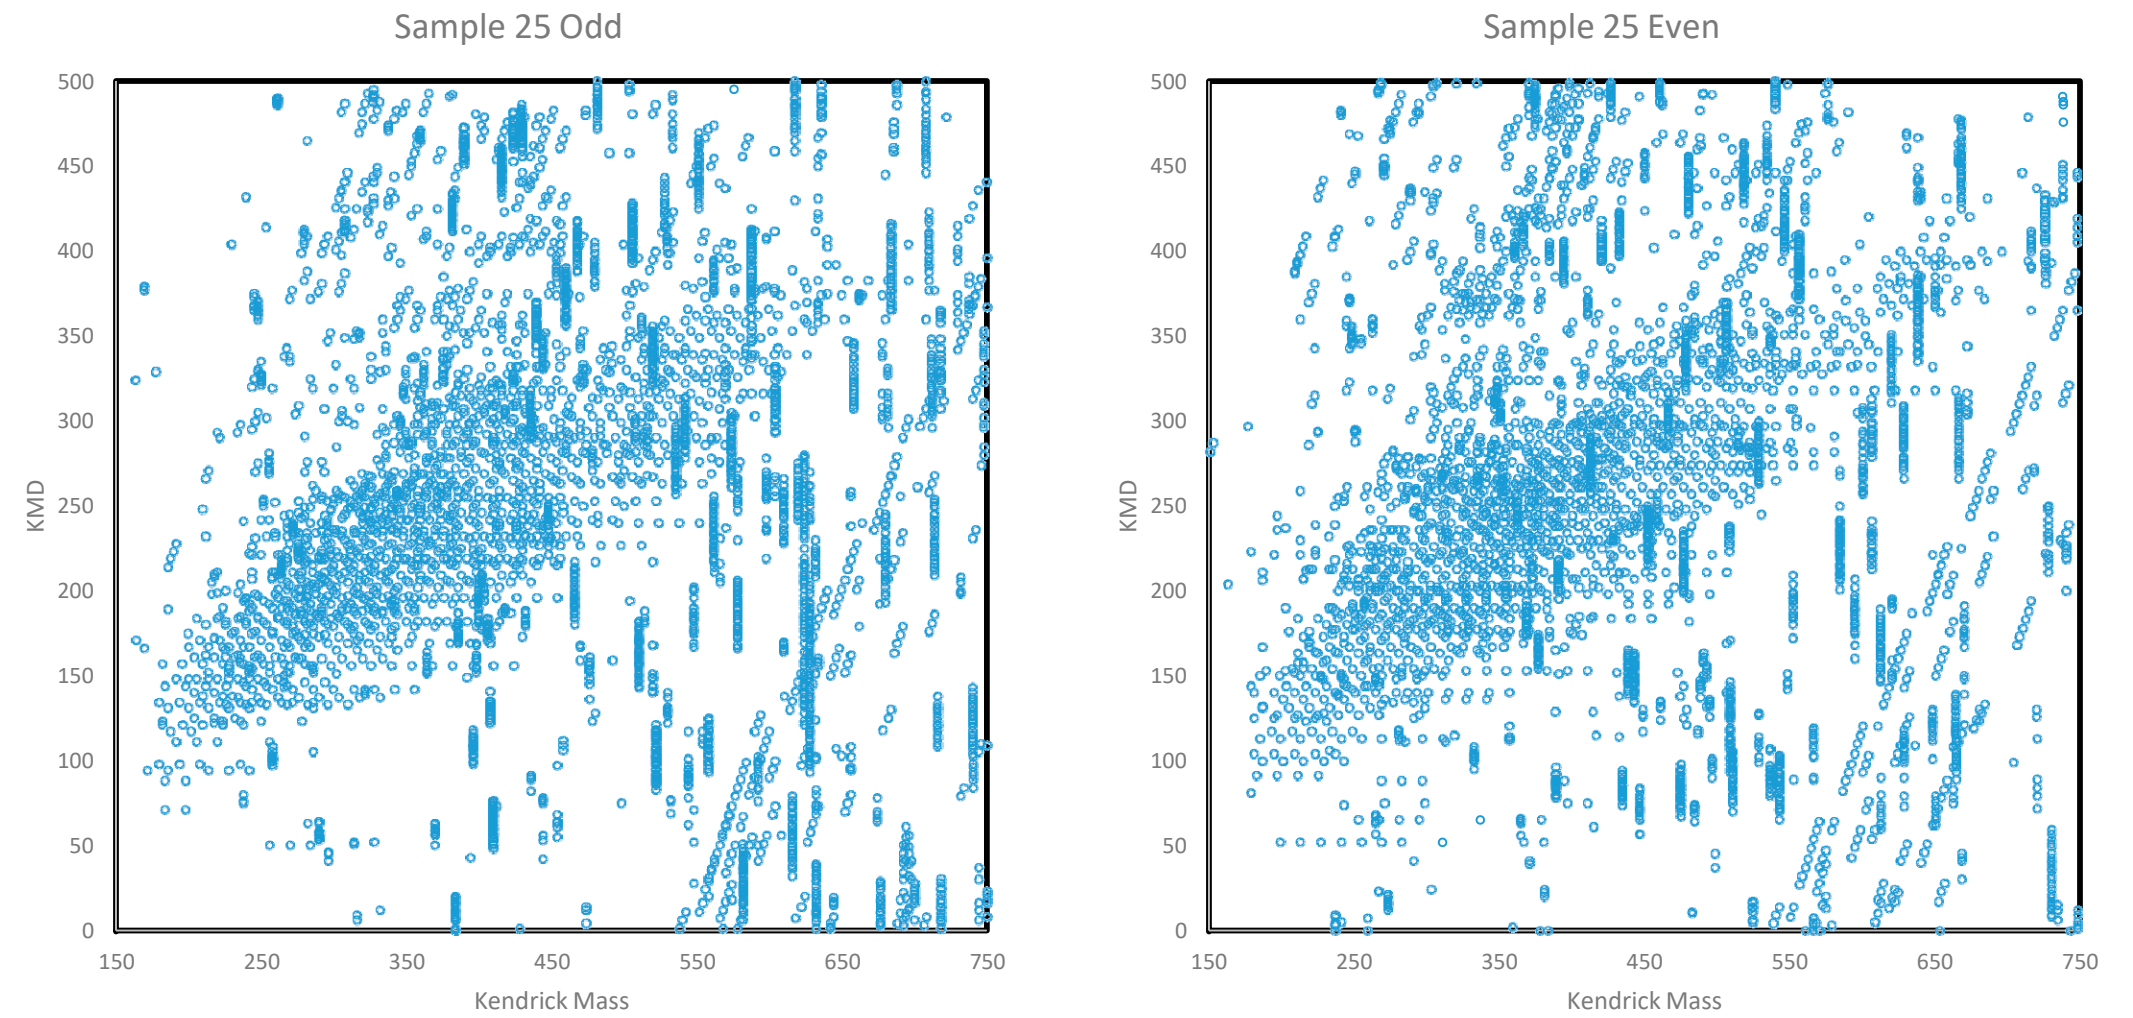

**Figure S7A.** Negative mode ESI FT-ICR-MS spectrum of organics extracted from cultured a marine hyperthermophilic Archeobacterium *Pyrobaculum sp.*

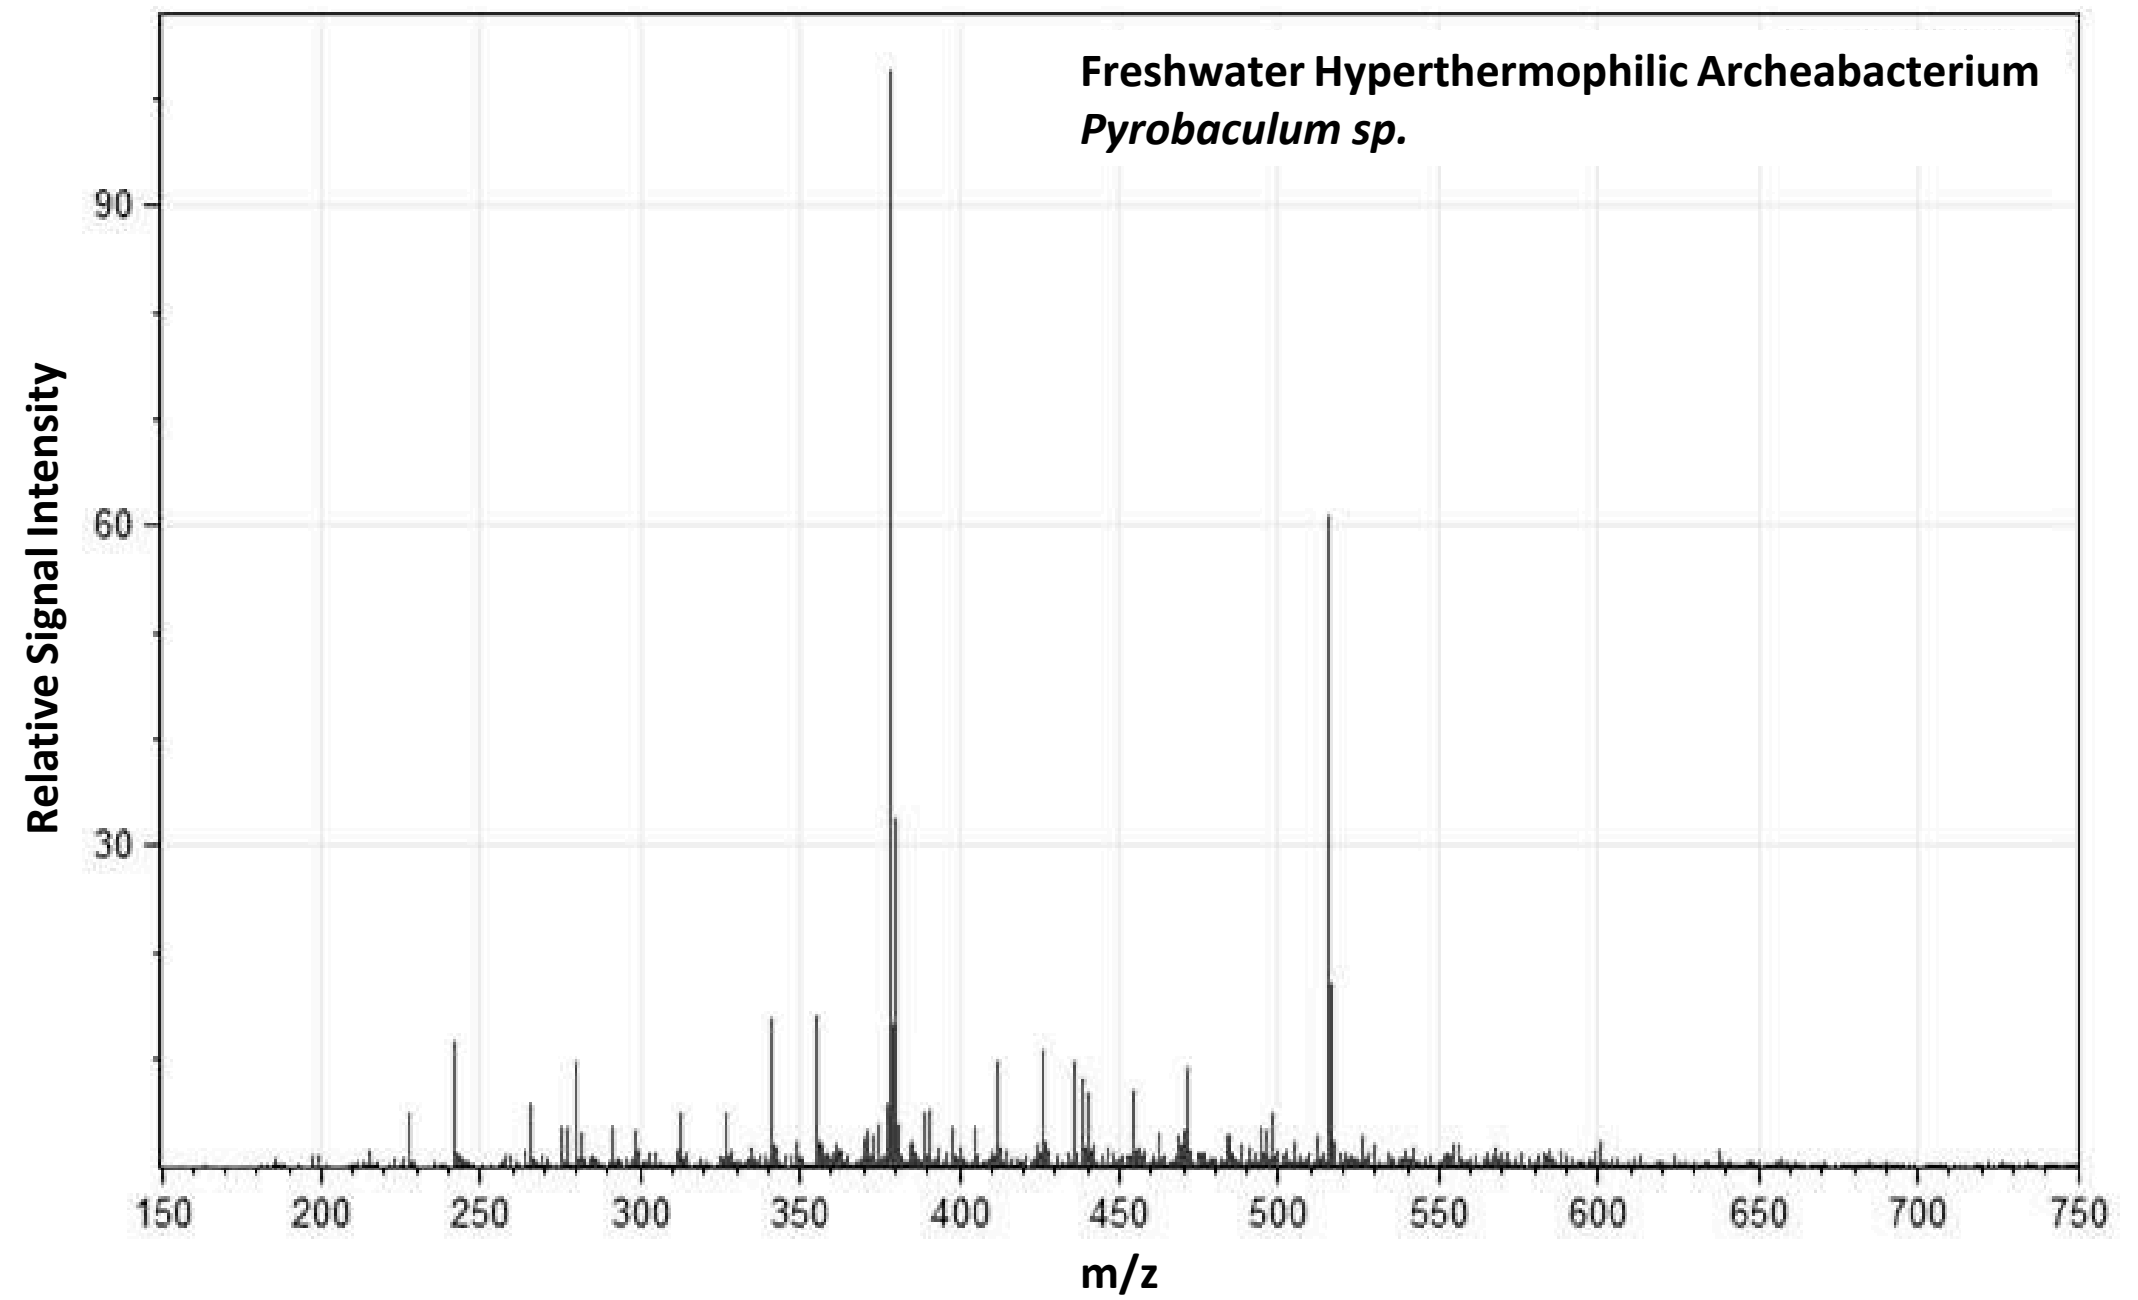

**Figure S7B.** Odd and even Kendrick Mass Defect plots of the organics extracted from cultured a marine hyperthermophilic Archeobacterium *Pyrobaculum sp.*

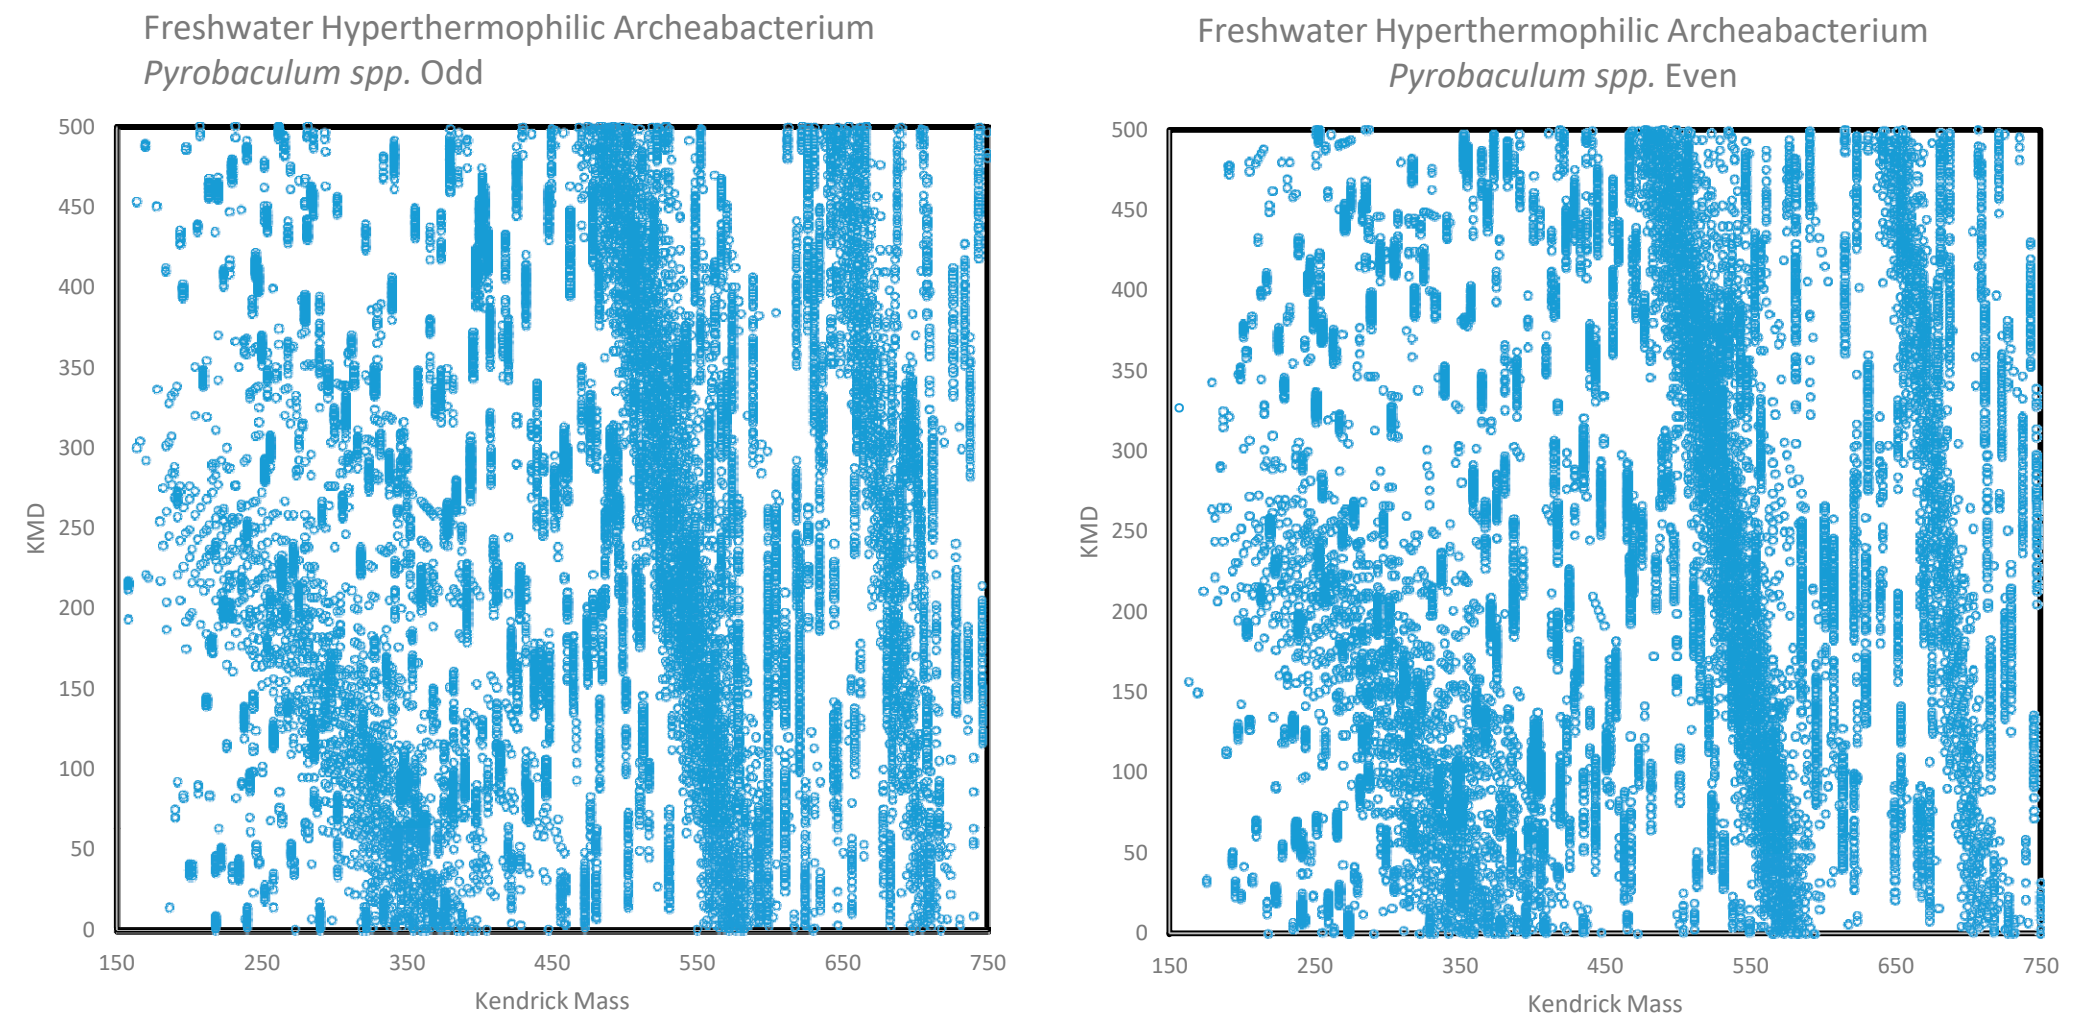

**Figure S8A.** Negative mode ESI FT-ICR-MS spectrum of organics extracted from cultured a marine Thermophilic Bacterium *Rhodothermus sp.*

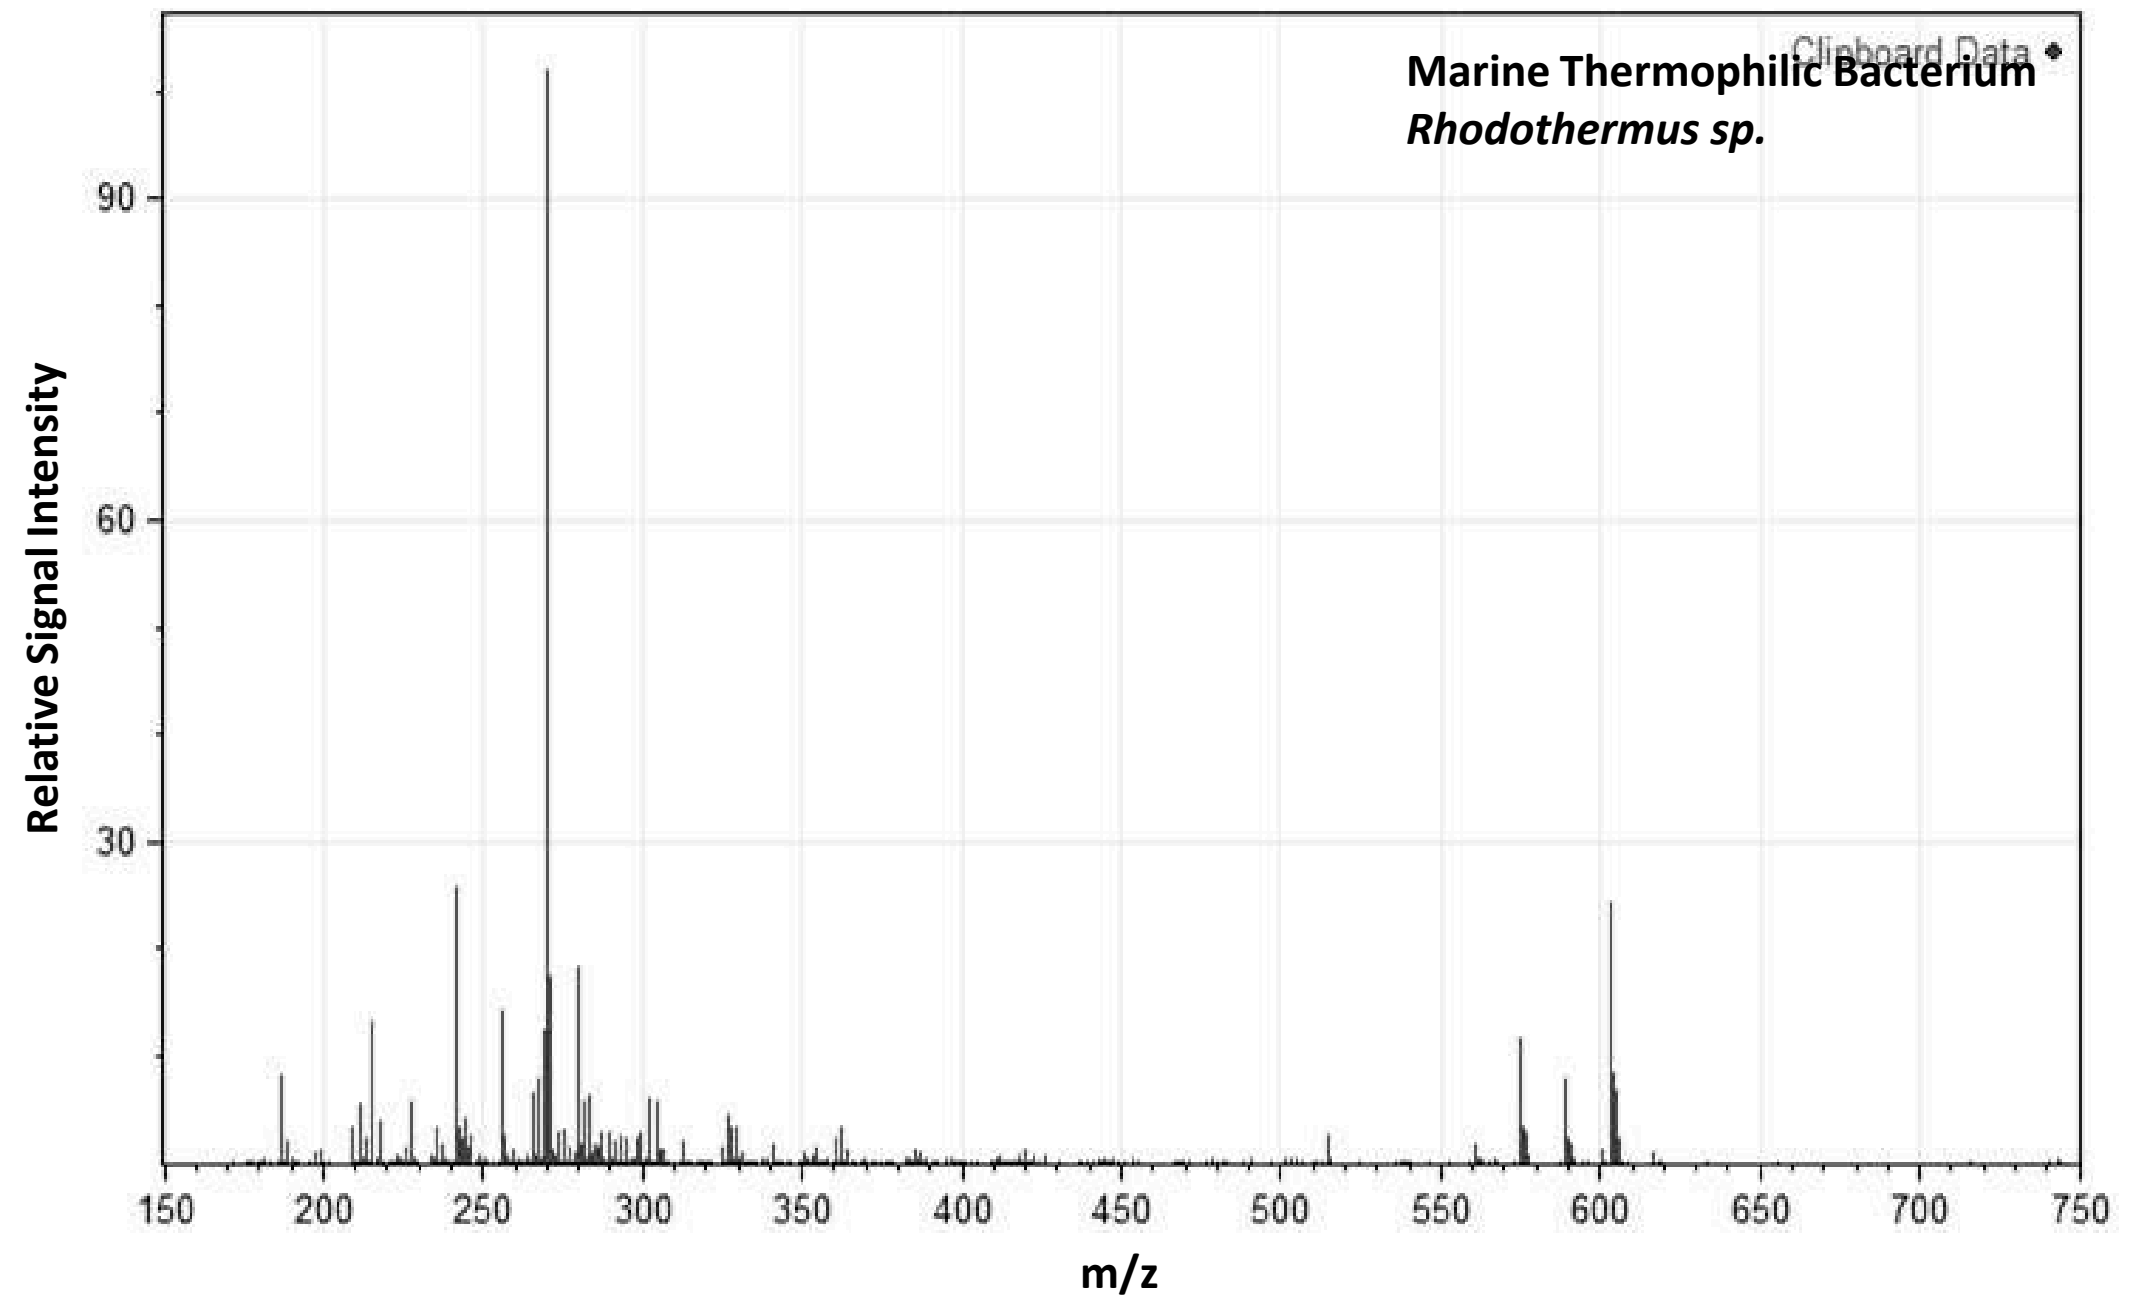

**Figure S8B.** Odd and even Kendrick Mass Defect plots of the organics extracted from cultured a marine thermophilic bacterium *Rhodothermus sp.*

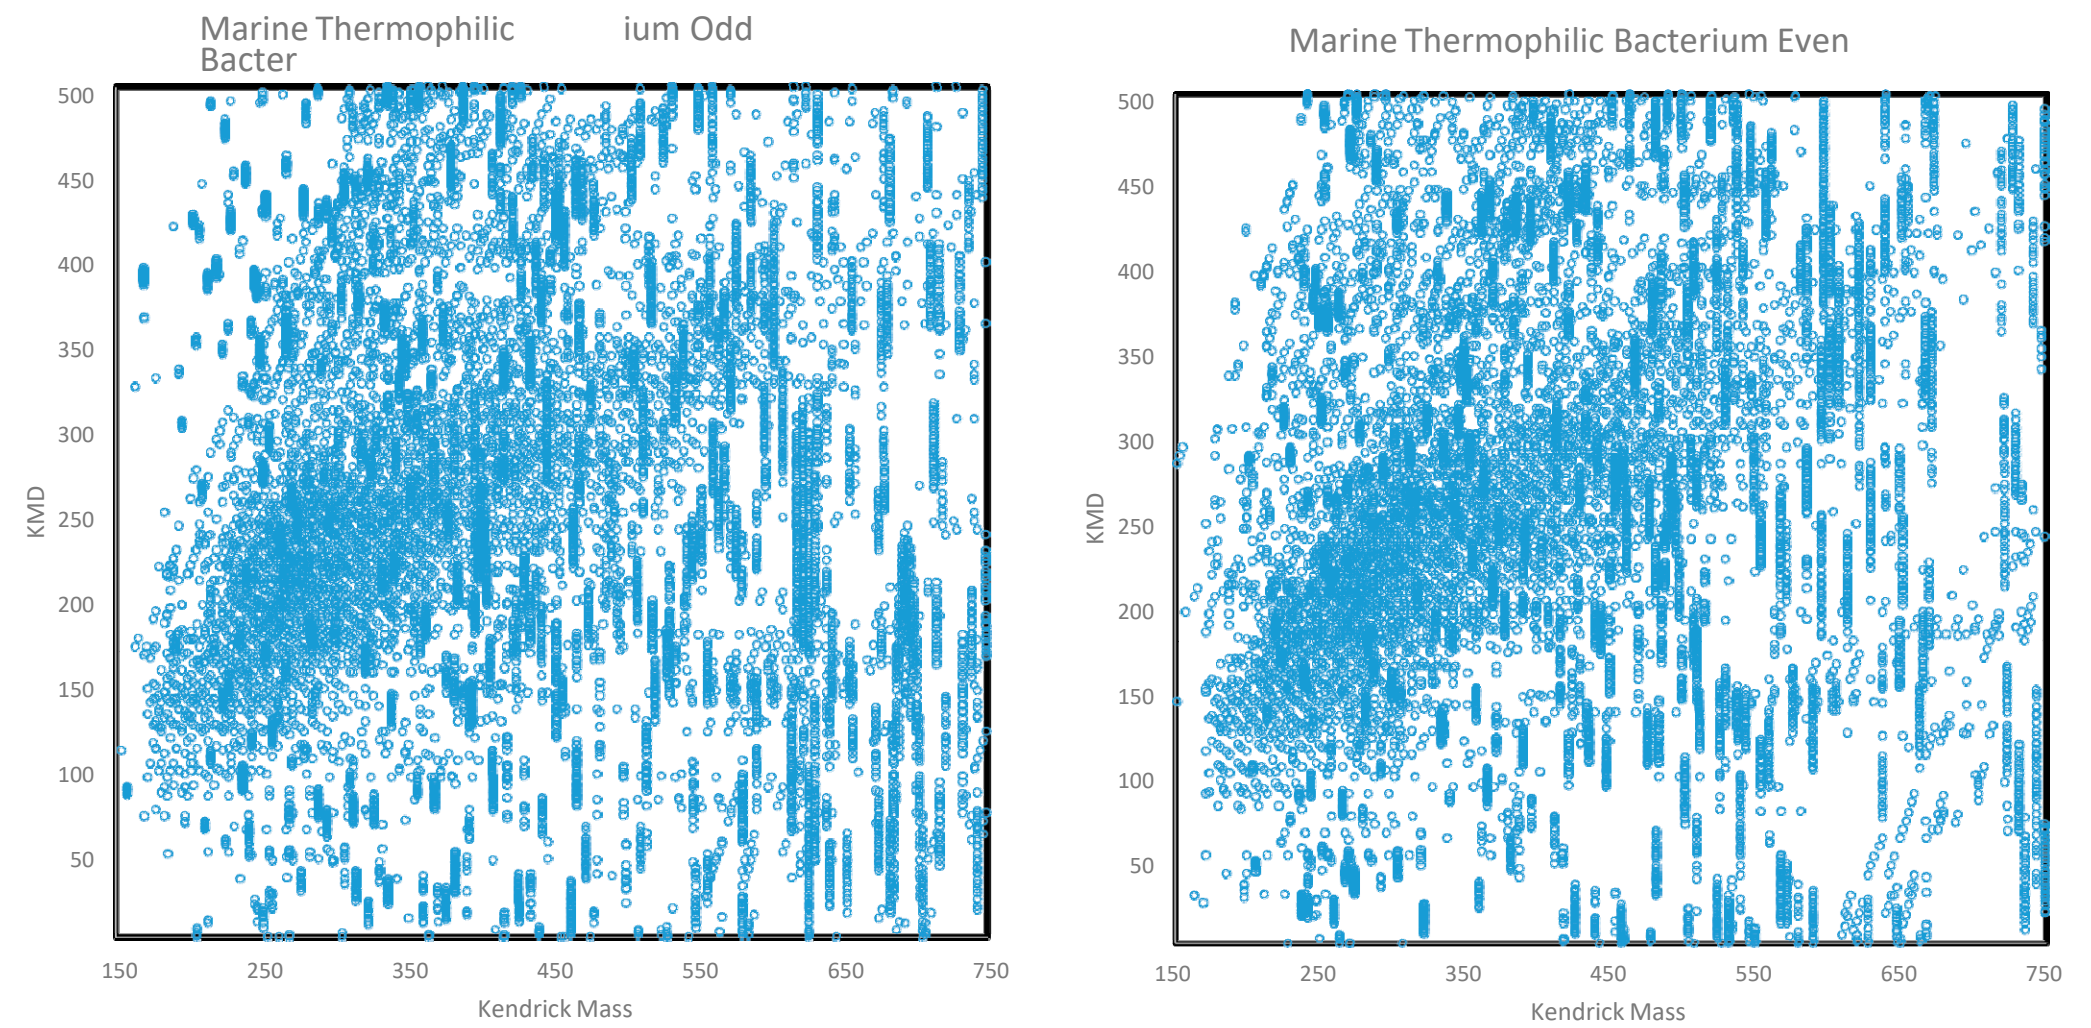



0

0

**m/z**

**Figure S9A.** Negative mode ESI FT-ICR-MS spectrum of organics extracted from Bell Creek Petroleum.

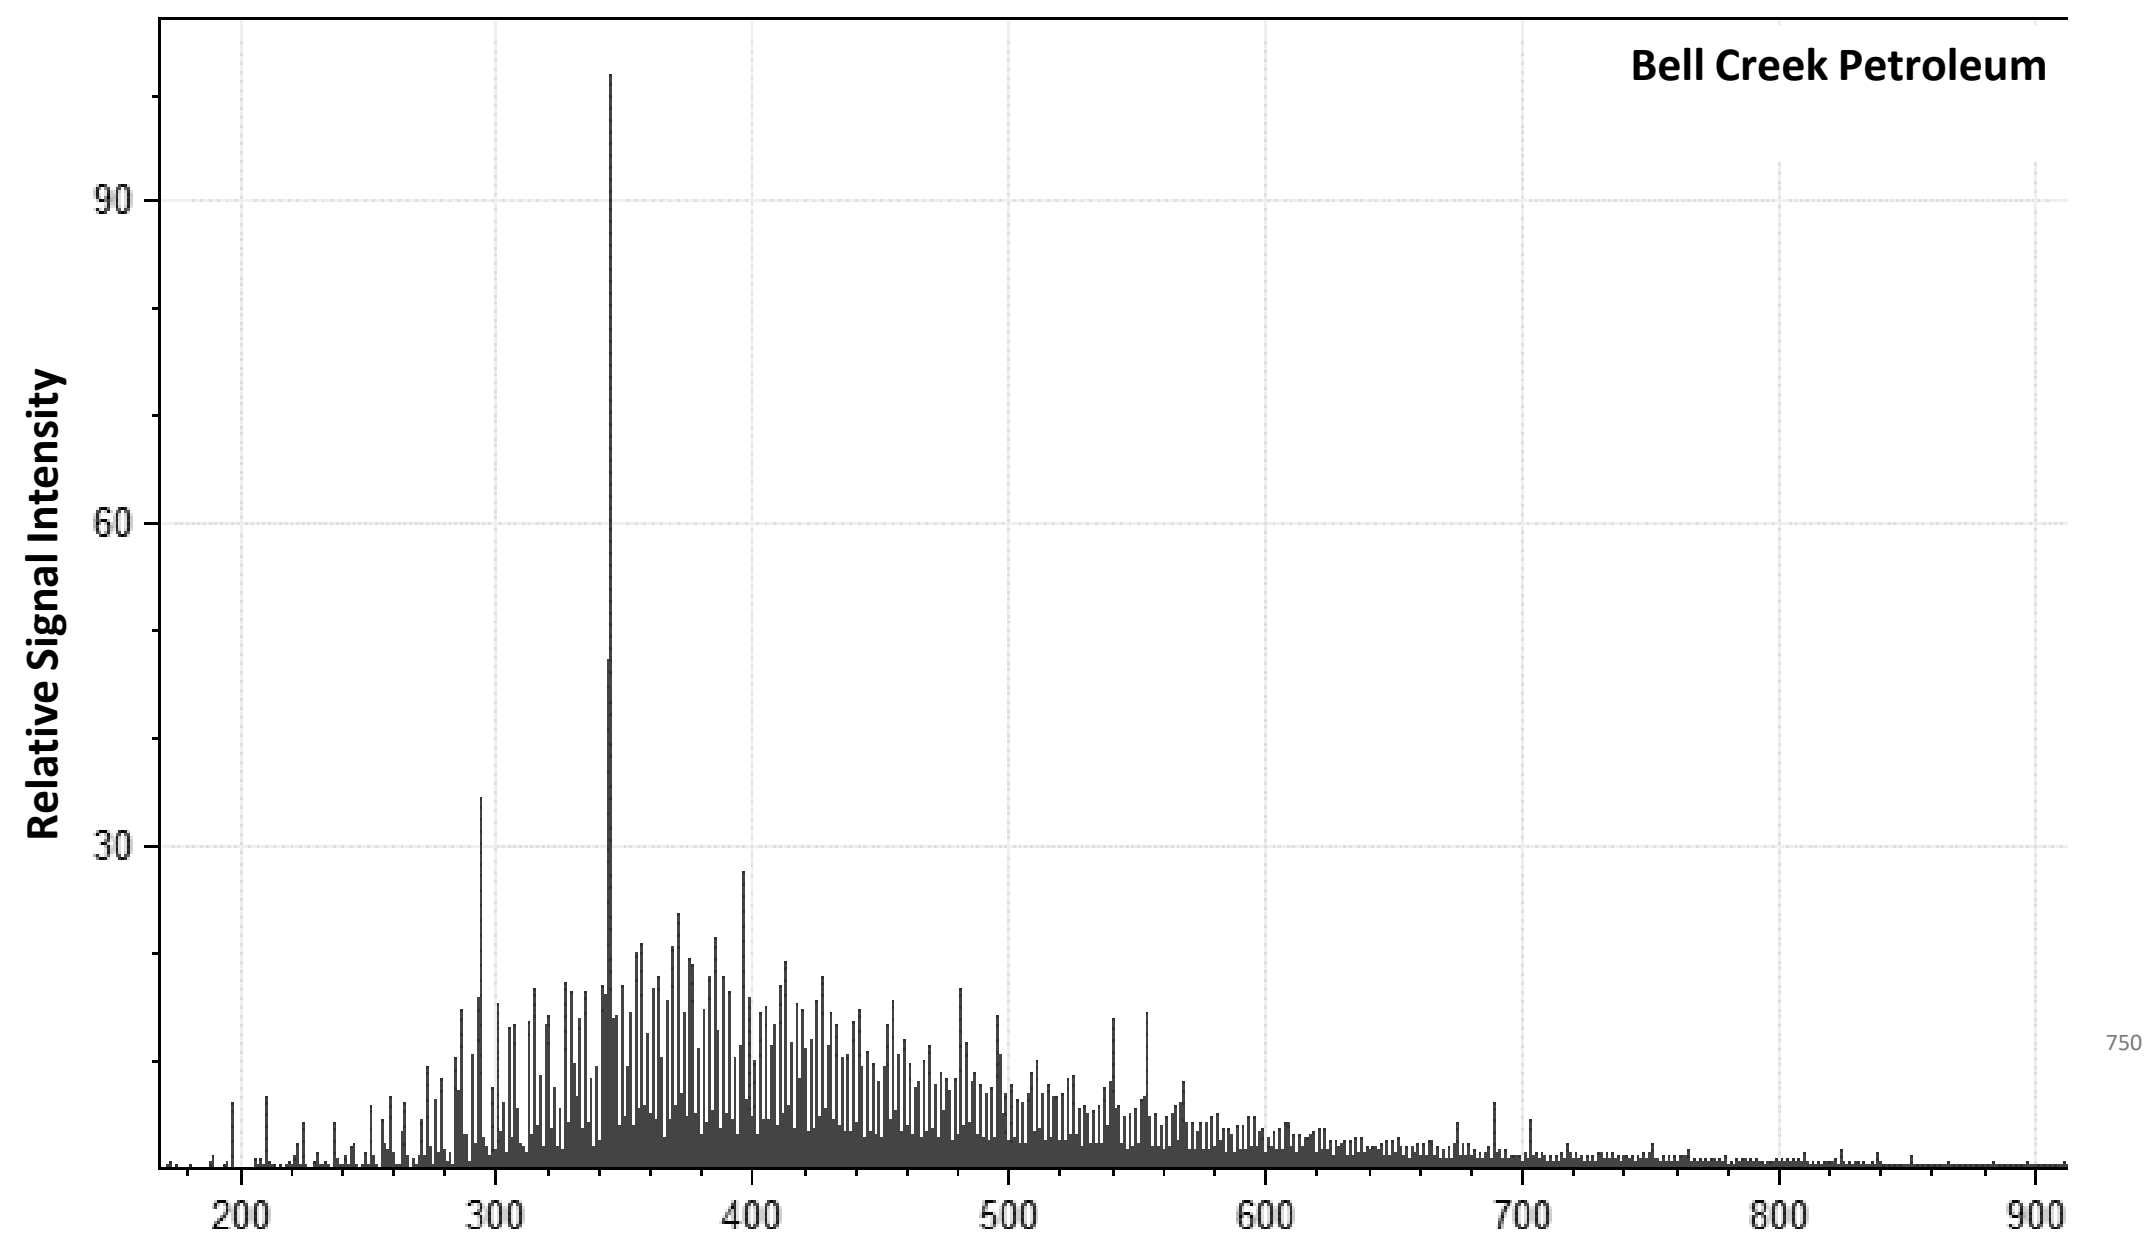

**Figure S9B.** Odd and even Kendrick Mass Defect plots of the organics extracted from Bell Creek Petroleum.

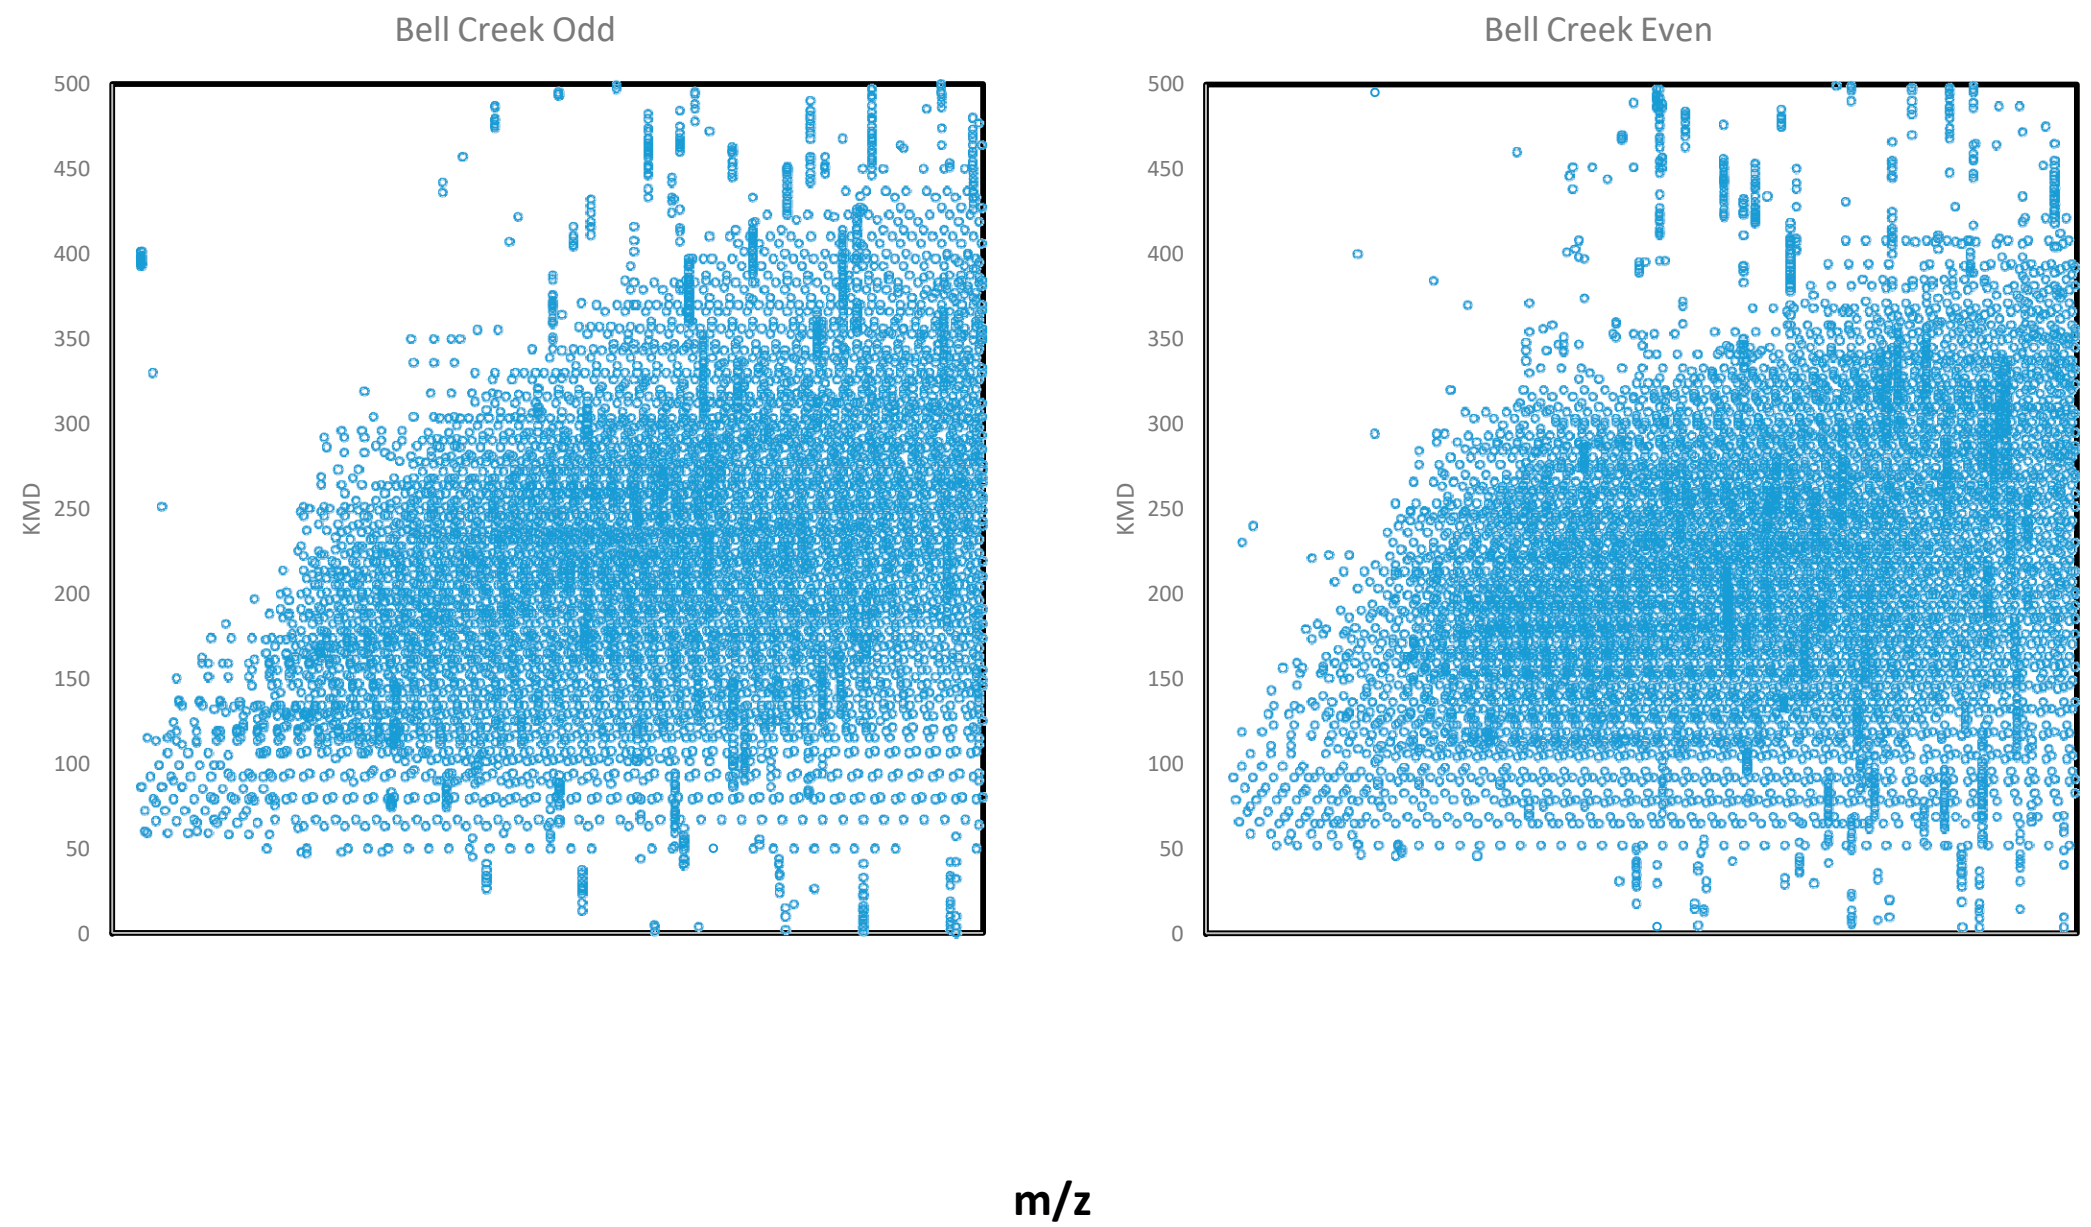

**Figure S10A.** Negative mode ESI FT-ICR-MS spectrum of organics extracted from Exxon 44647 Petroleum.

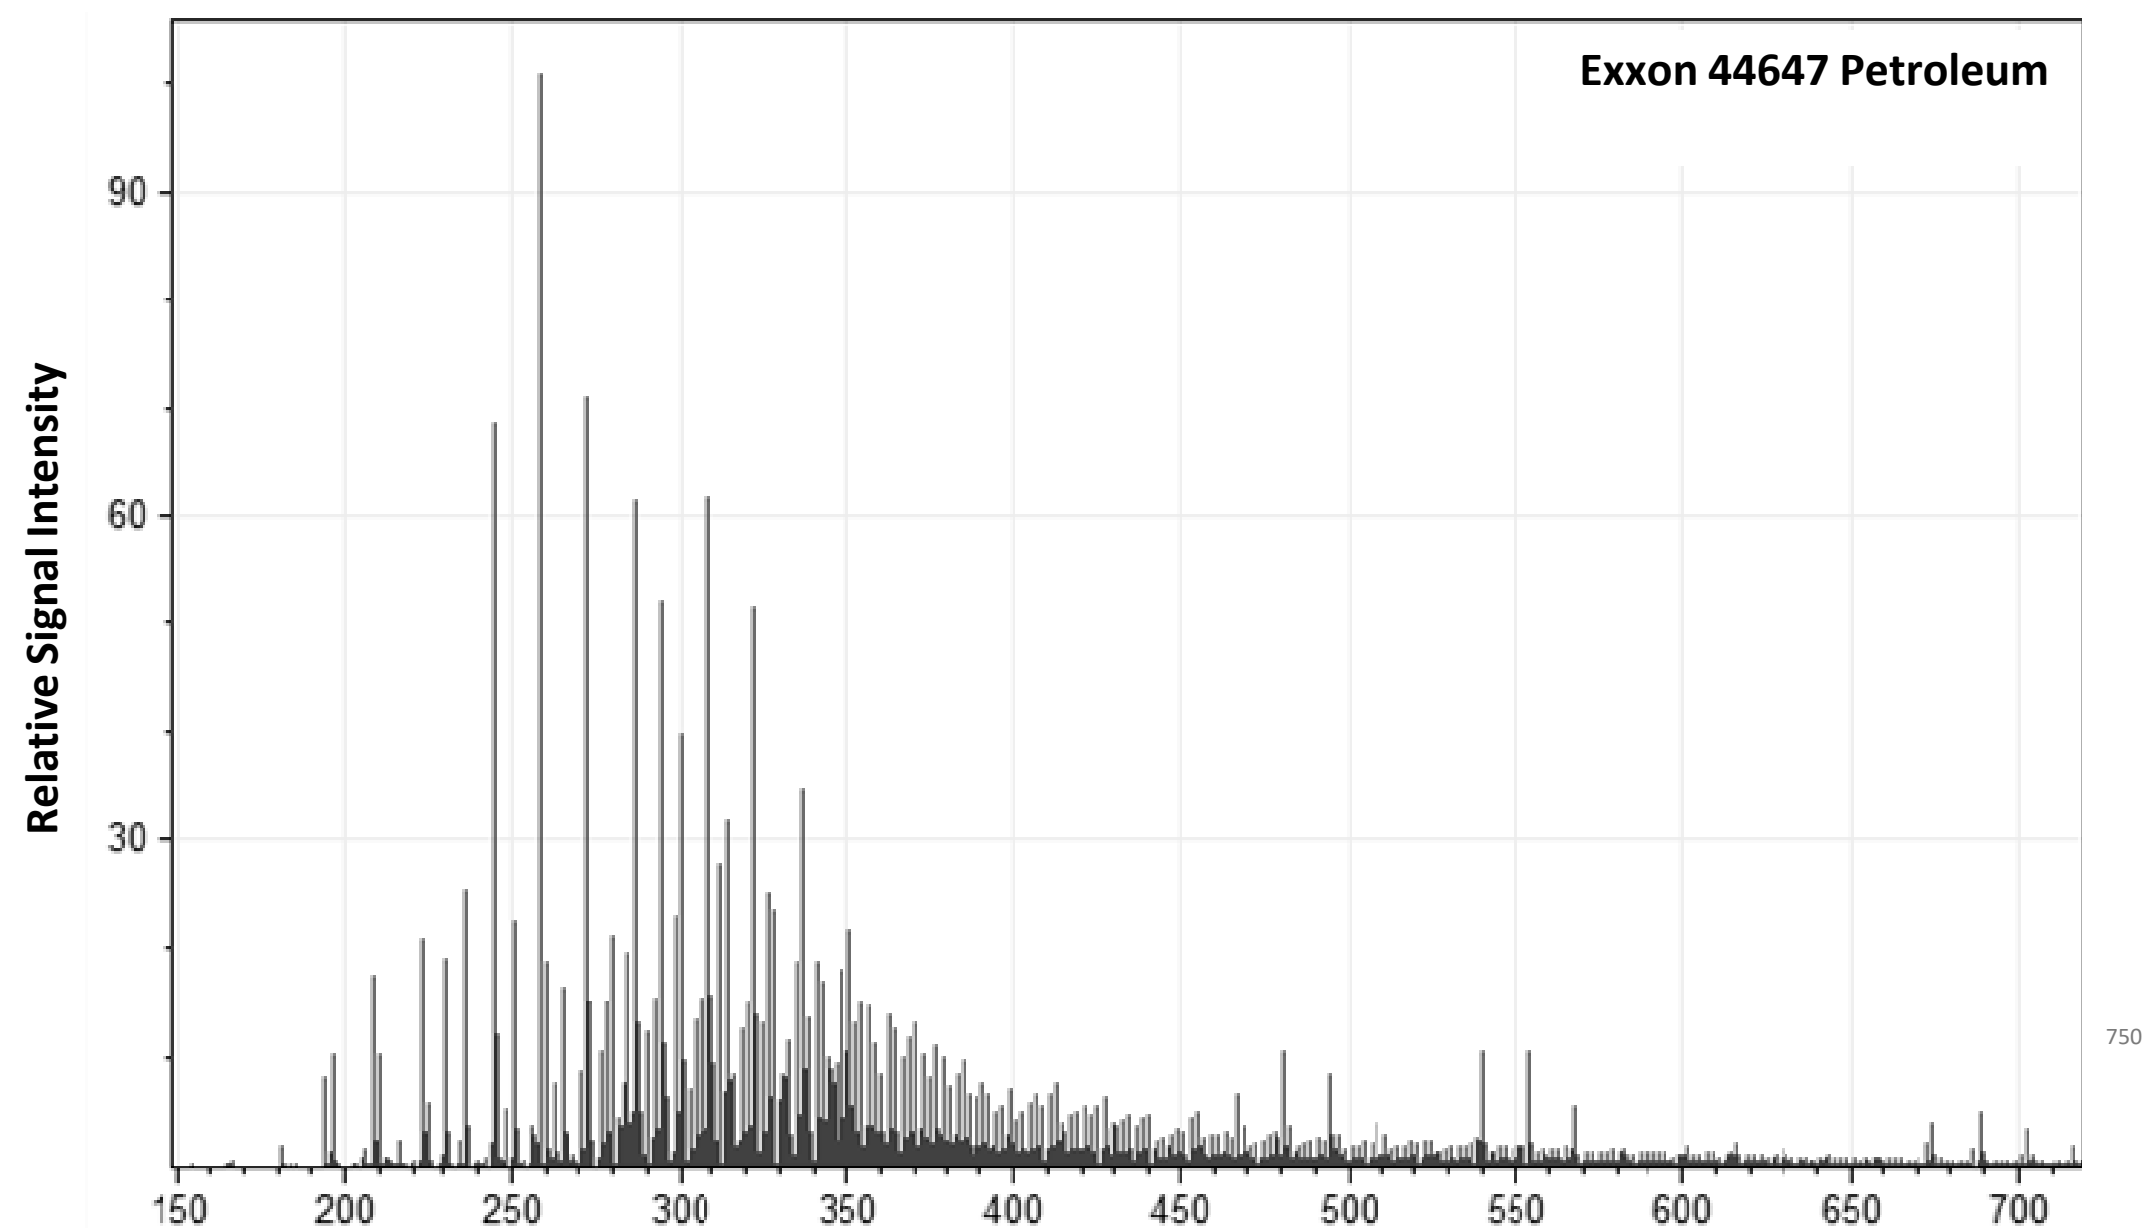

**Figure S10B.** Odd and even Kendrick Mass Defect plots of the organics extracted from Exxon 44647 Petroleum.

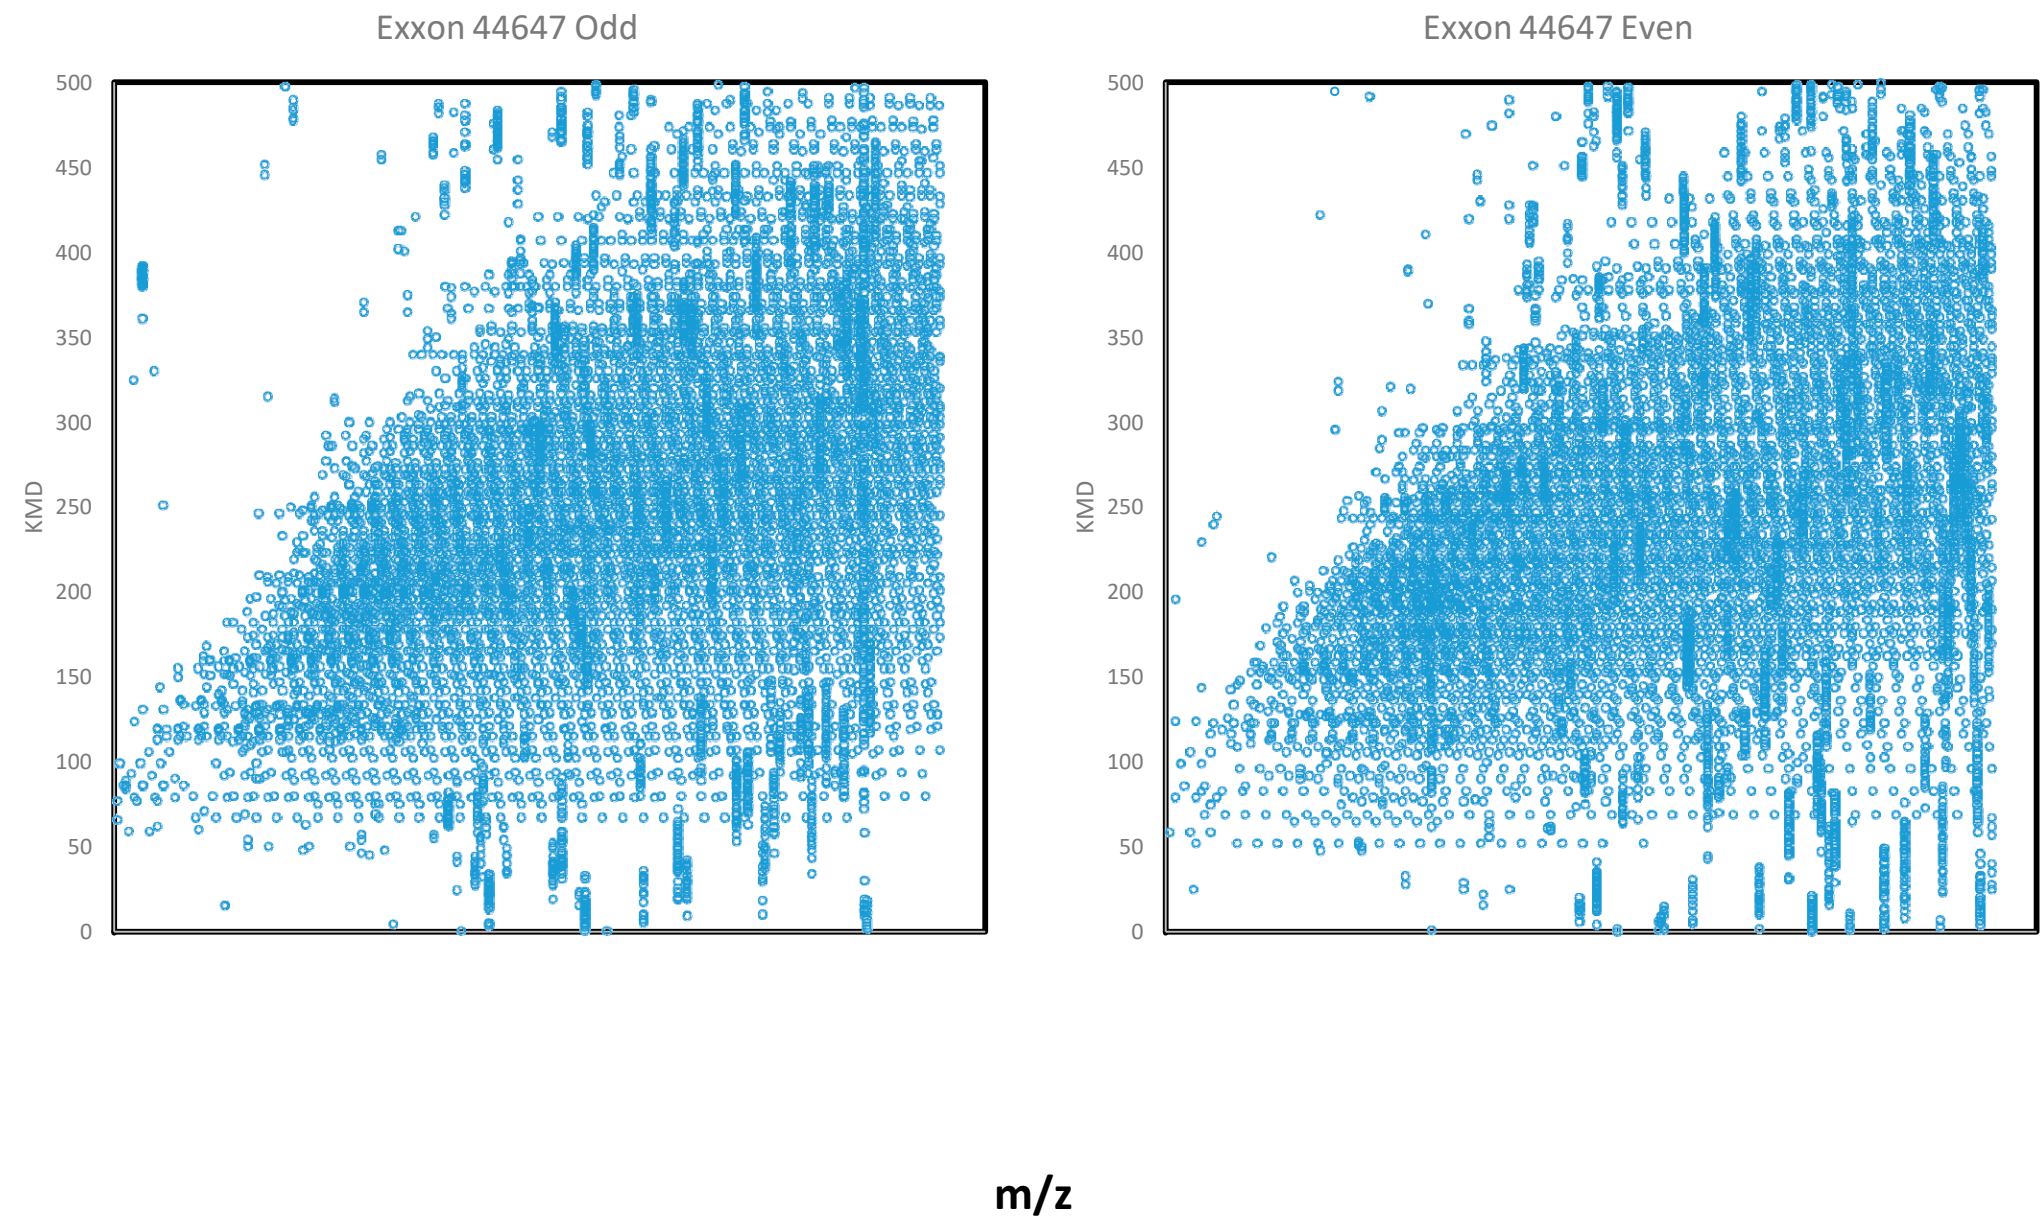

**Figure S11A.** Negative mode ESI FT-ICR-MS spectrum of organics extracted from the reaction of 7.4 M glucose heated at 85° C for eight days.

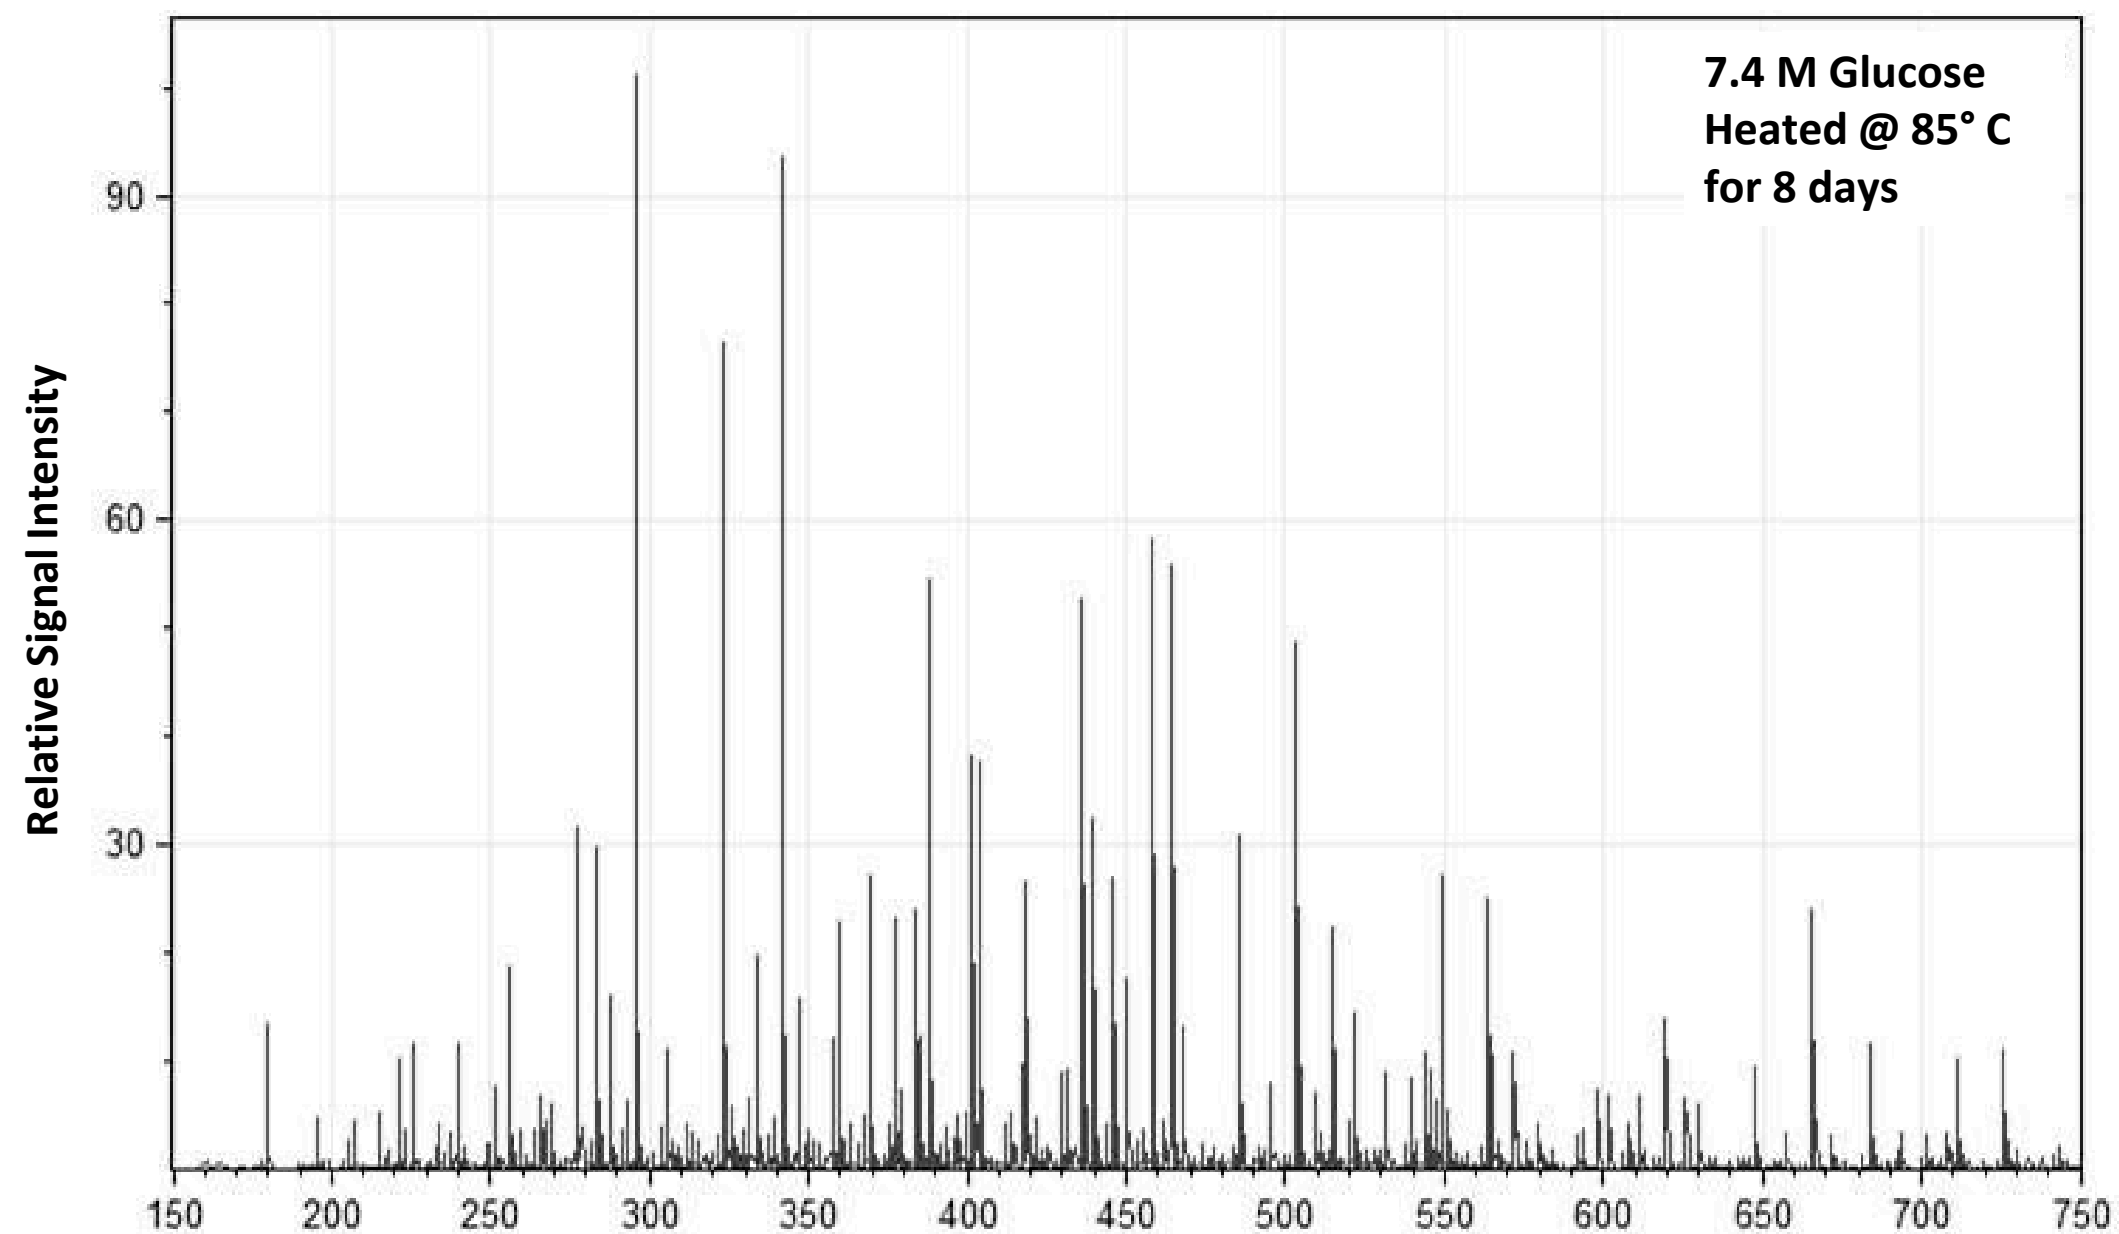

**Figure S11B.** Odd and even Kendrick Mass Defect plots of the organics extracted from the reaction of 7.4 M glucose heated at 85° C for eight days.

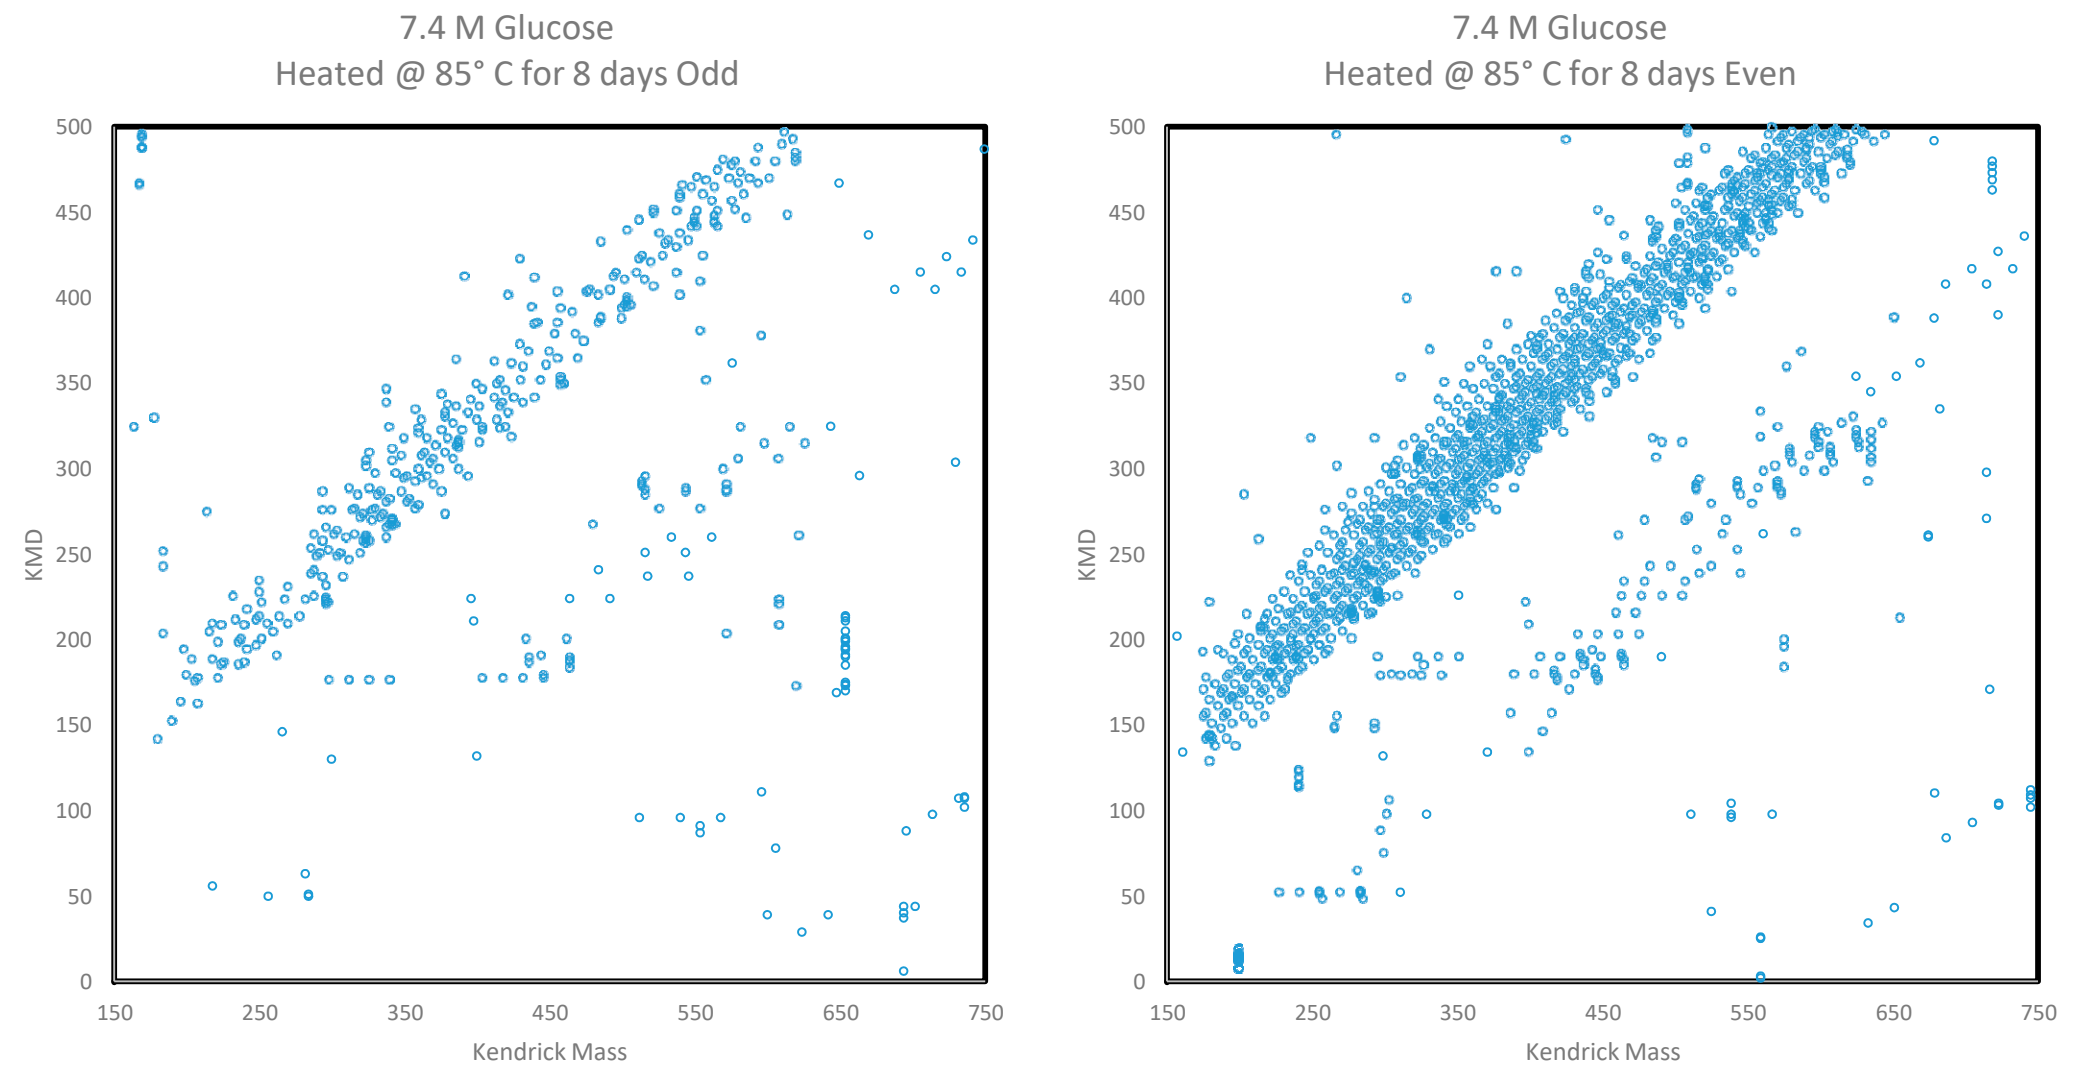

34 Glucose dry heated 150 C 2days

**Figure S12A.** Negative mode ESI FT-ICR-MS spectrum of organics extracted from the reaction of 3.3 M glucose and 3.3 M Glycine heated at 85° C for eight days.

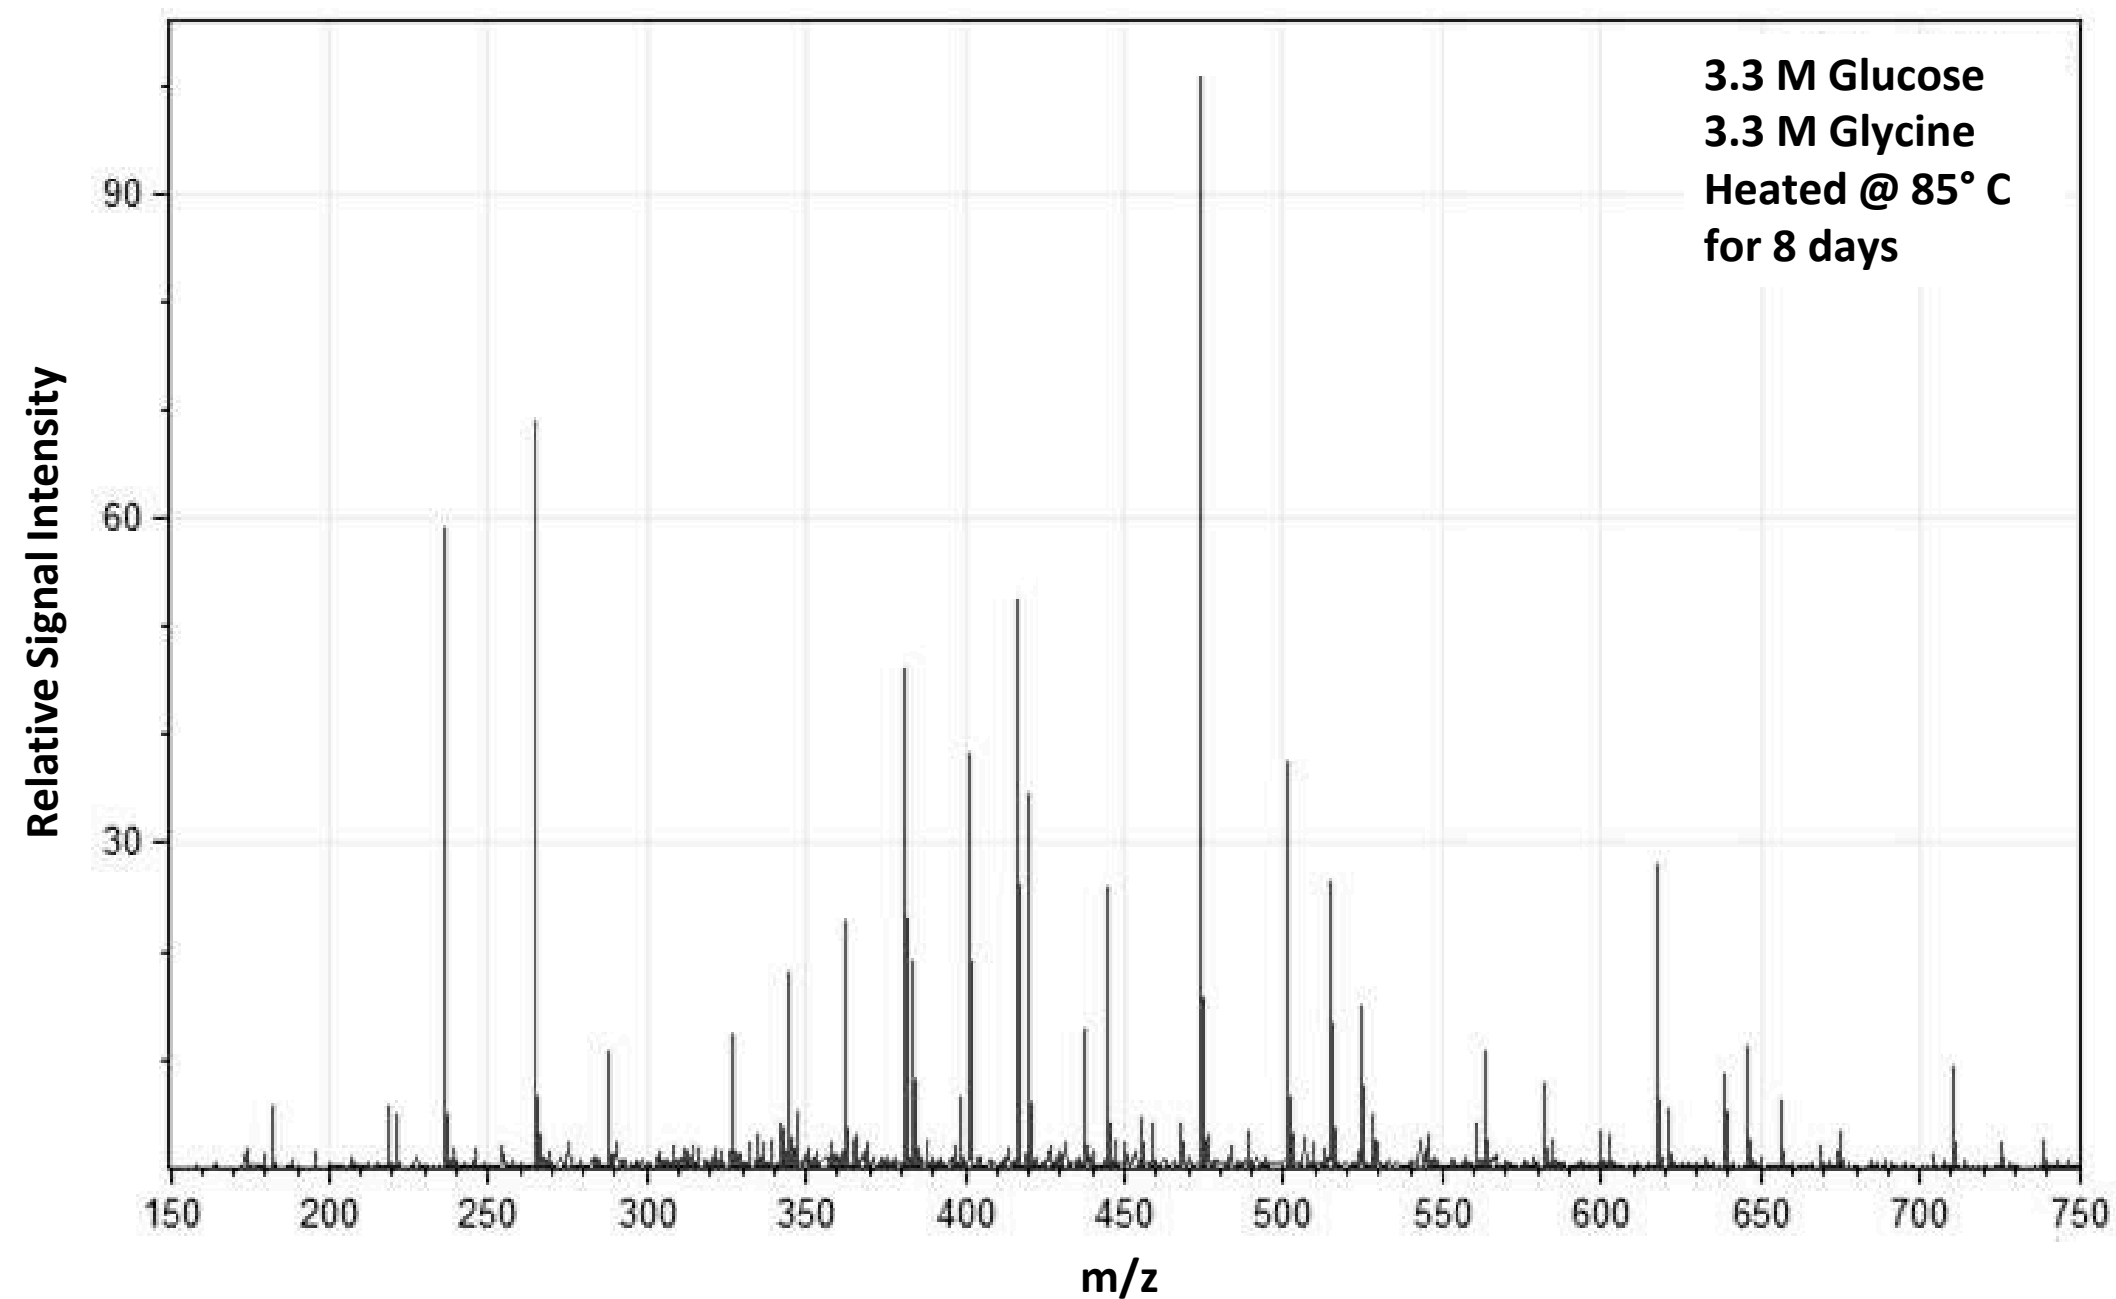



**Figure S12B.** Odd and even Kendrick Mass Defect plots of the organics extracted from the reaction of 3.3 M glucose and 3.3 M Glycine heated at 85° C for eight days.

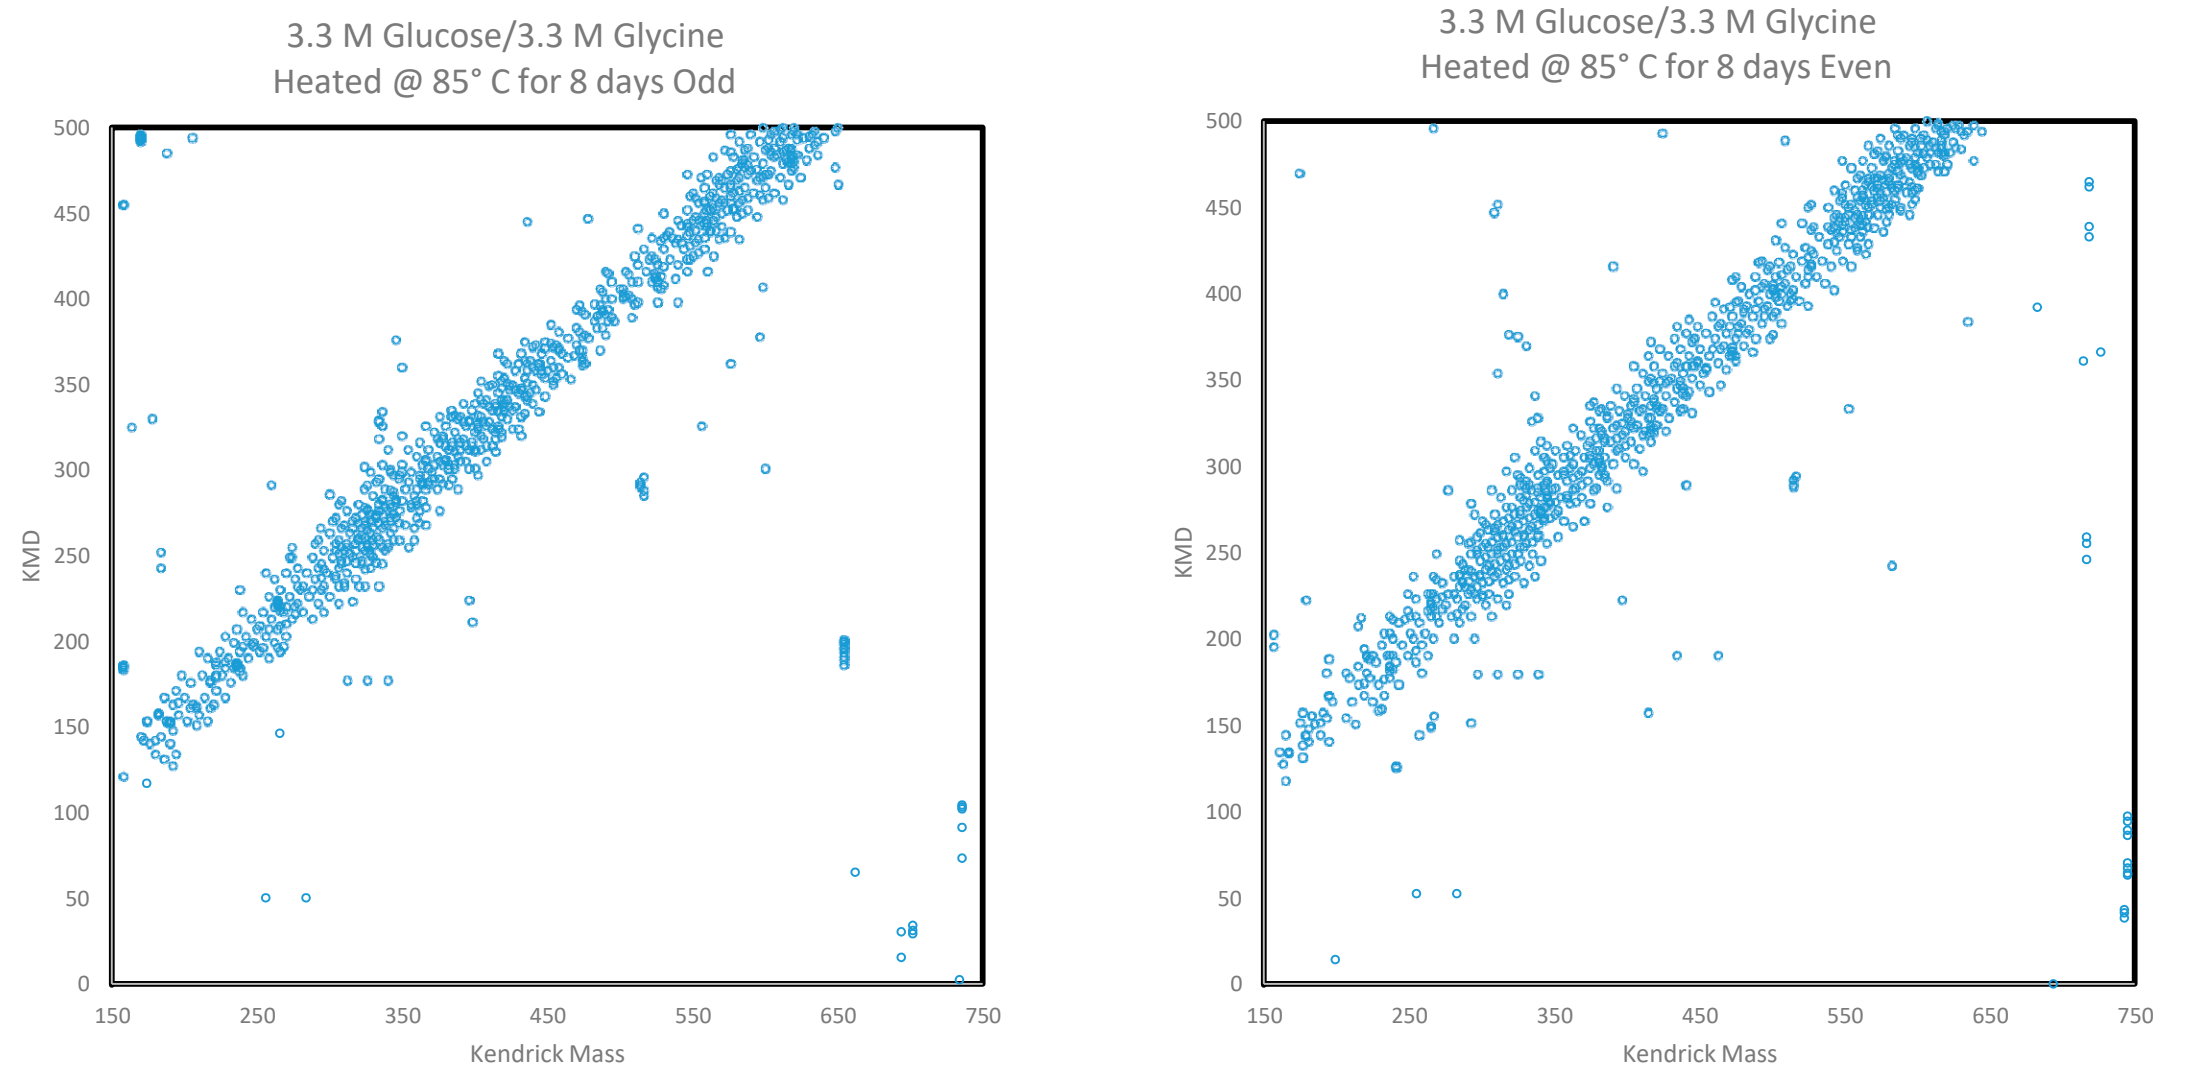

35 Glucose + Glycine wet

**Figure S13A.** Negative mode ESI FT-ICR-MS spectrum of organics extracted from the reaction of 200 mg glucose and 84 mg glycine dry heated at 150° C for eight days.

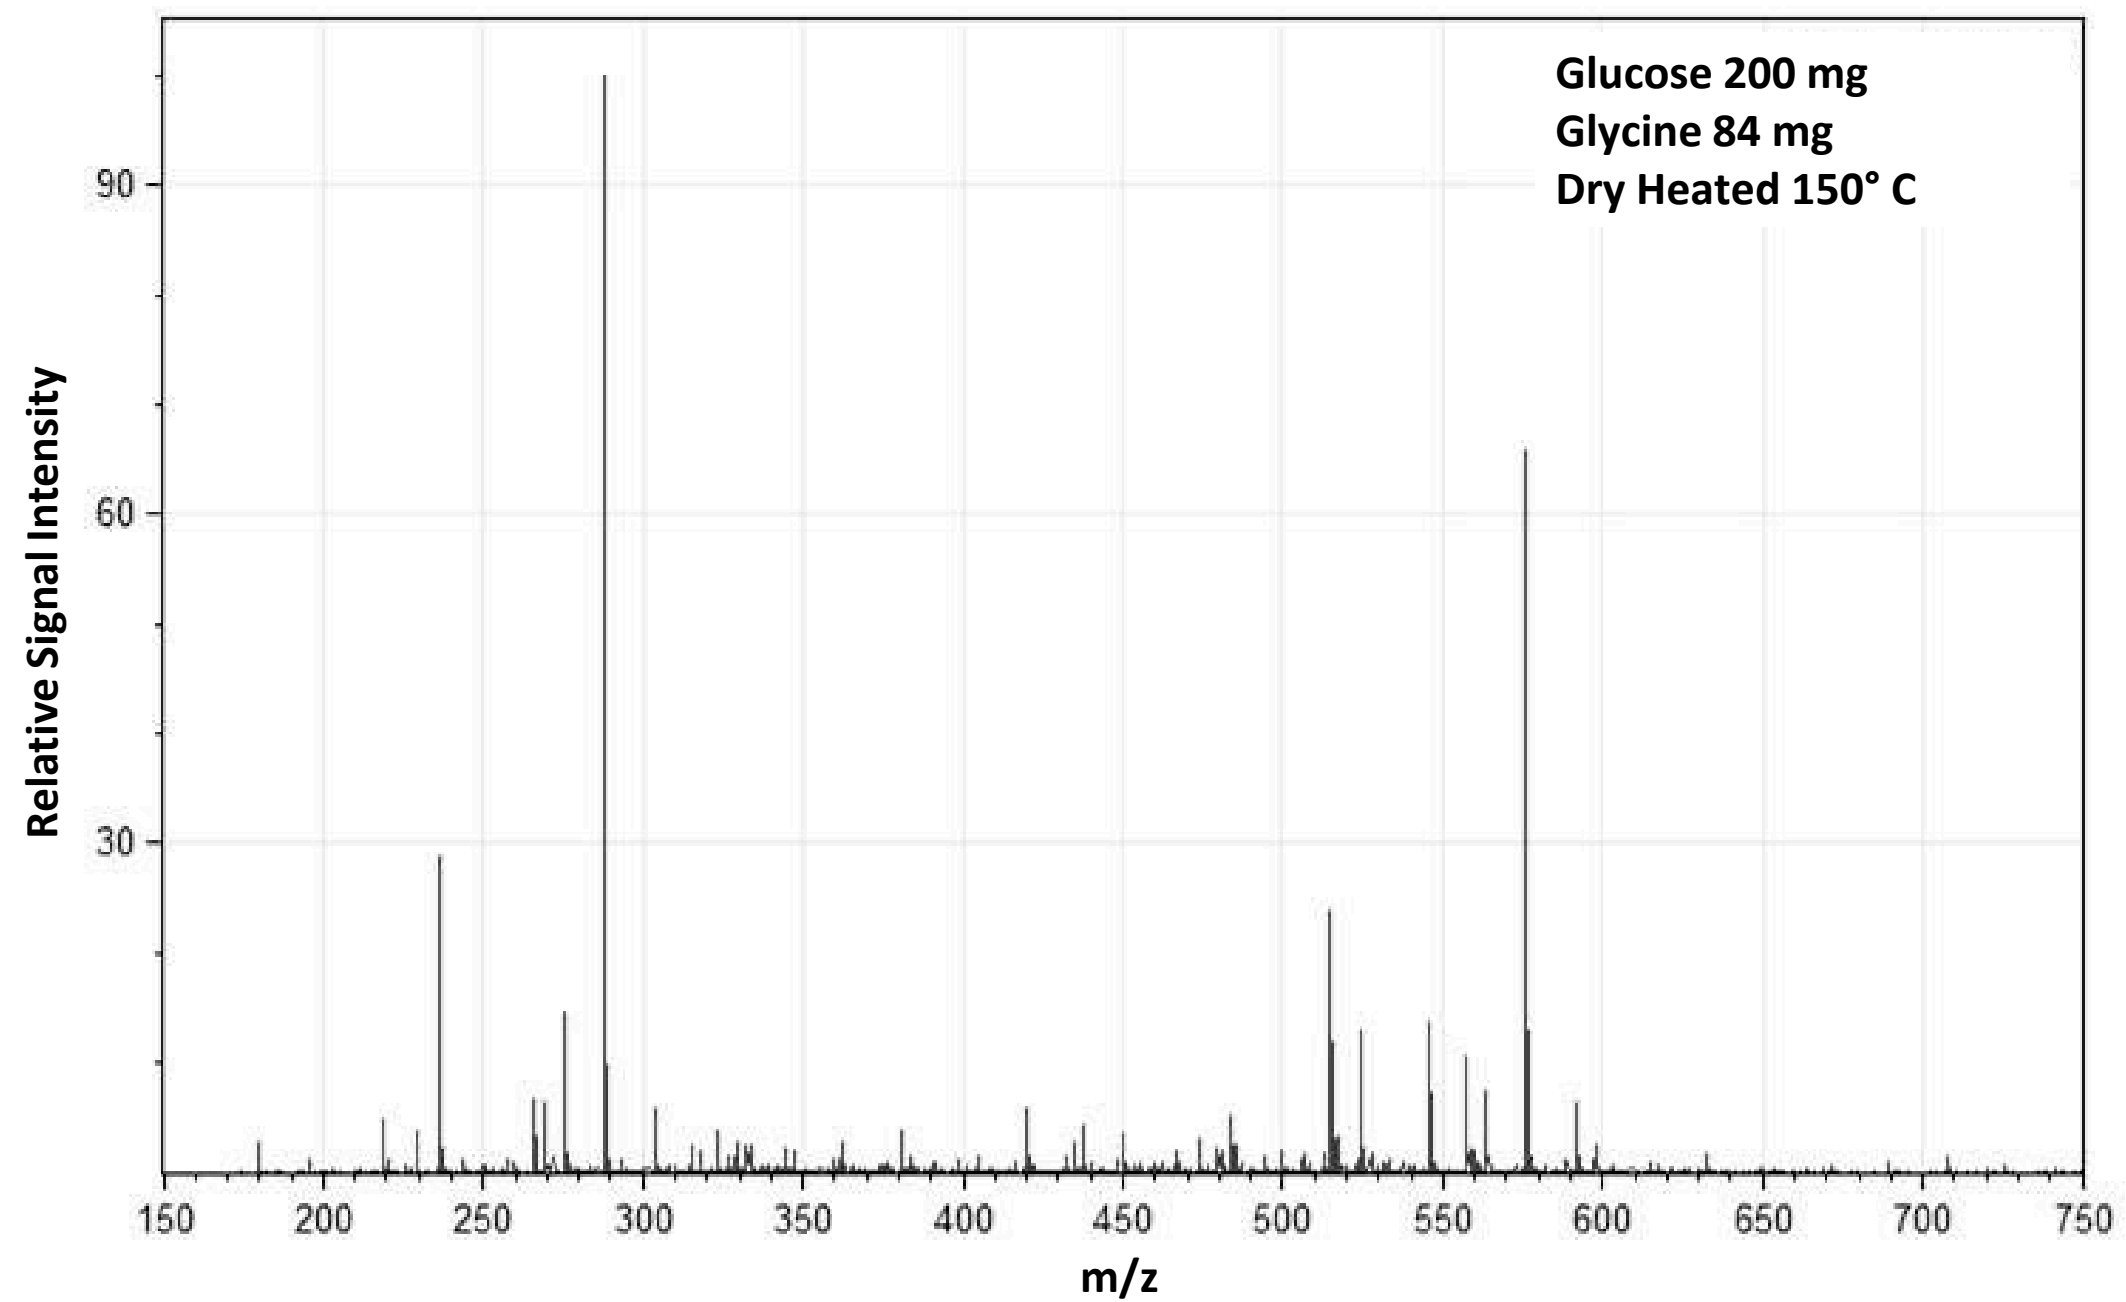

**Figure S13B.** Odd and even Kendrick Mass Defect plots of the organics extracted from the reaction of 200 mg glucose and 84 mg glycine dry heated at 150° C for eight days.

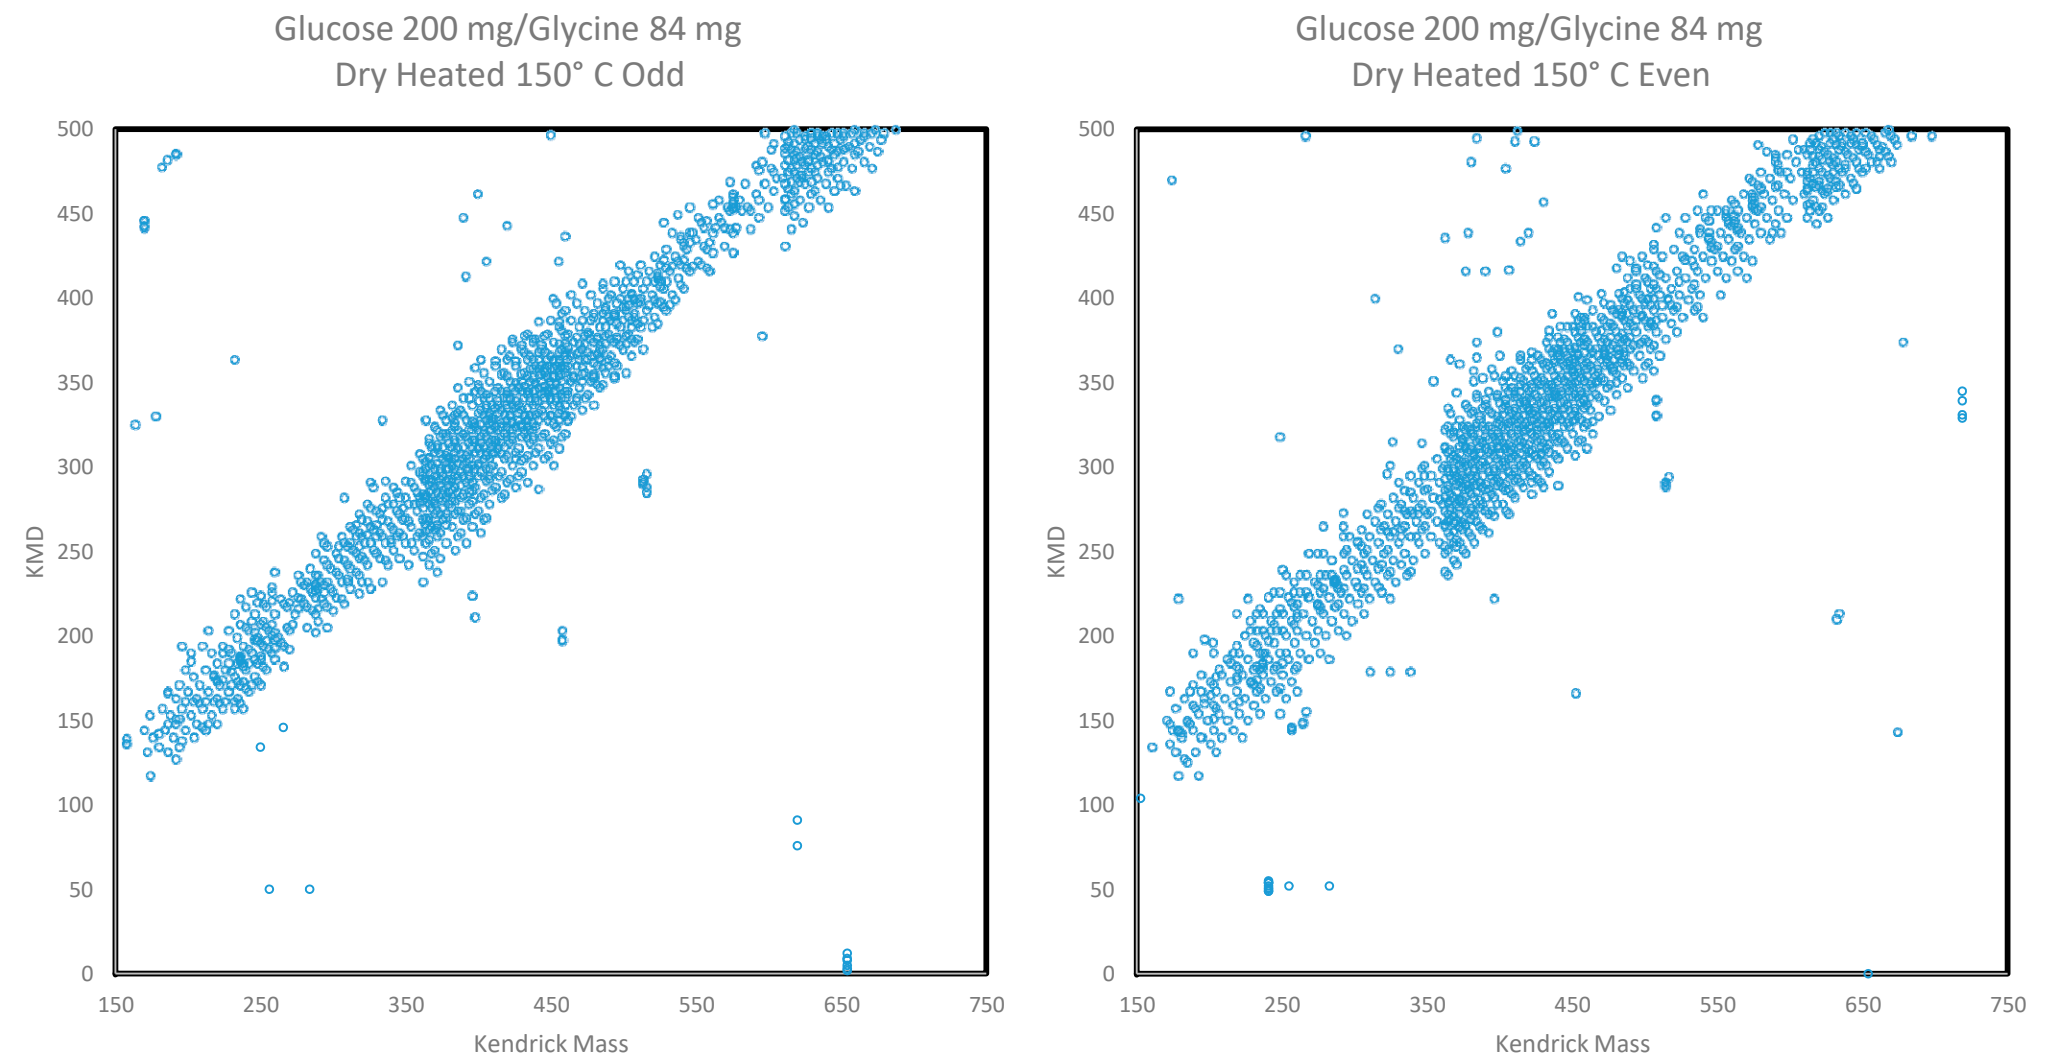

36 Glucose + Glycine Dry

**Figure S14A.** Negative mode ESI FT-ICR-MS spectrum of organics extracted from the reaction of 3.3 M glucose and 3.3 M NH<sub>4</sub>OH heated at 85° C for eight days.

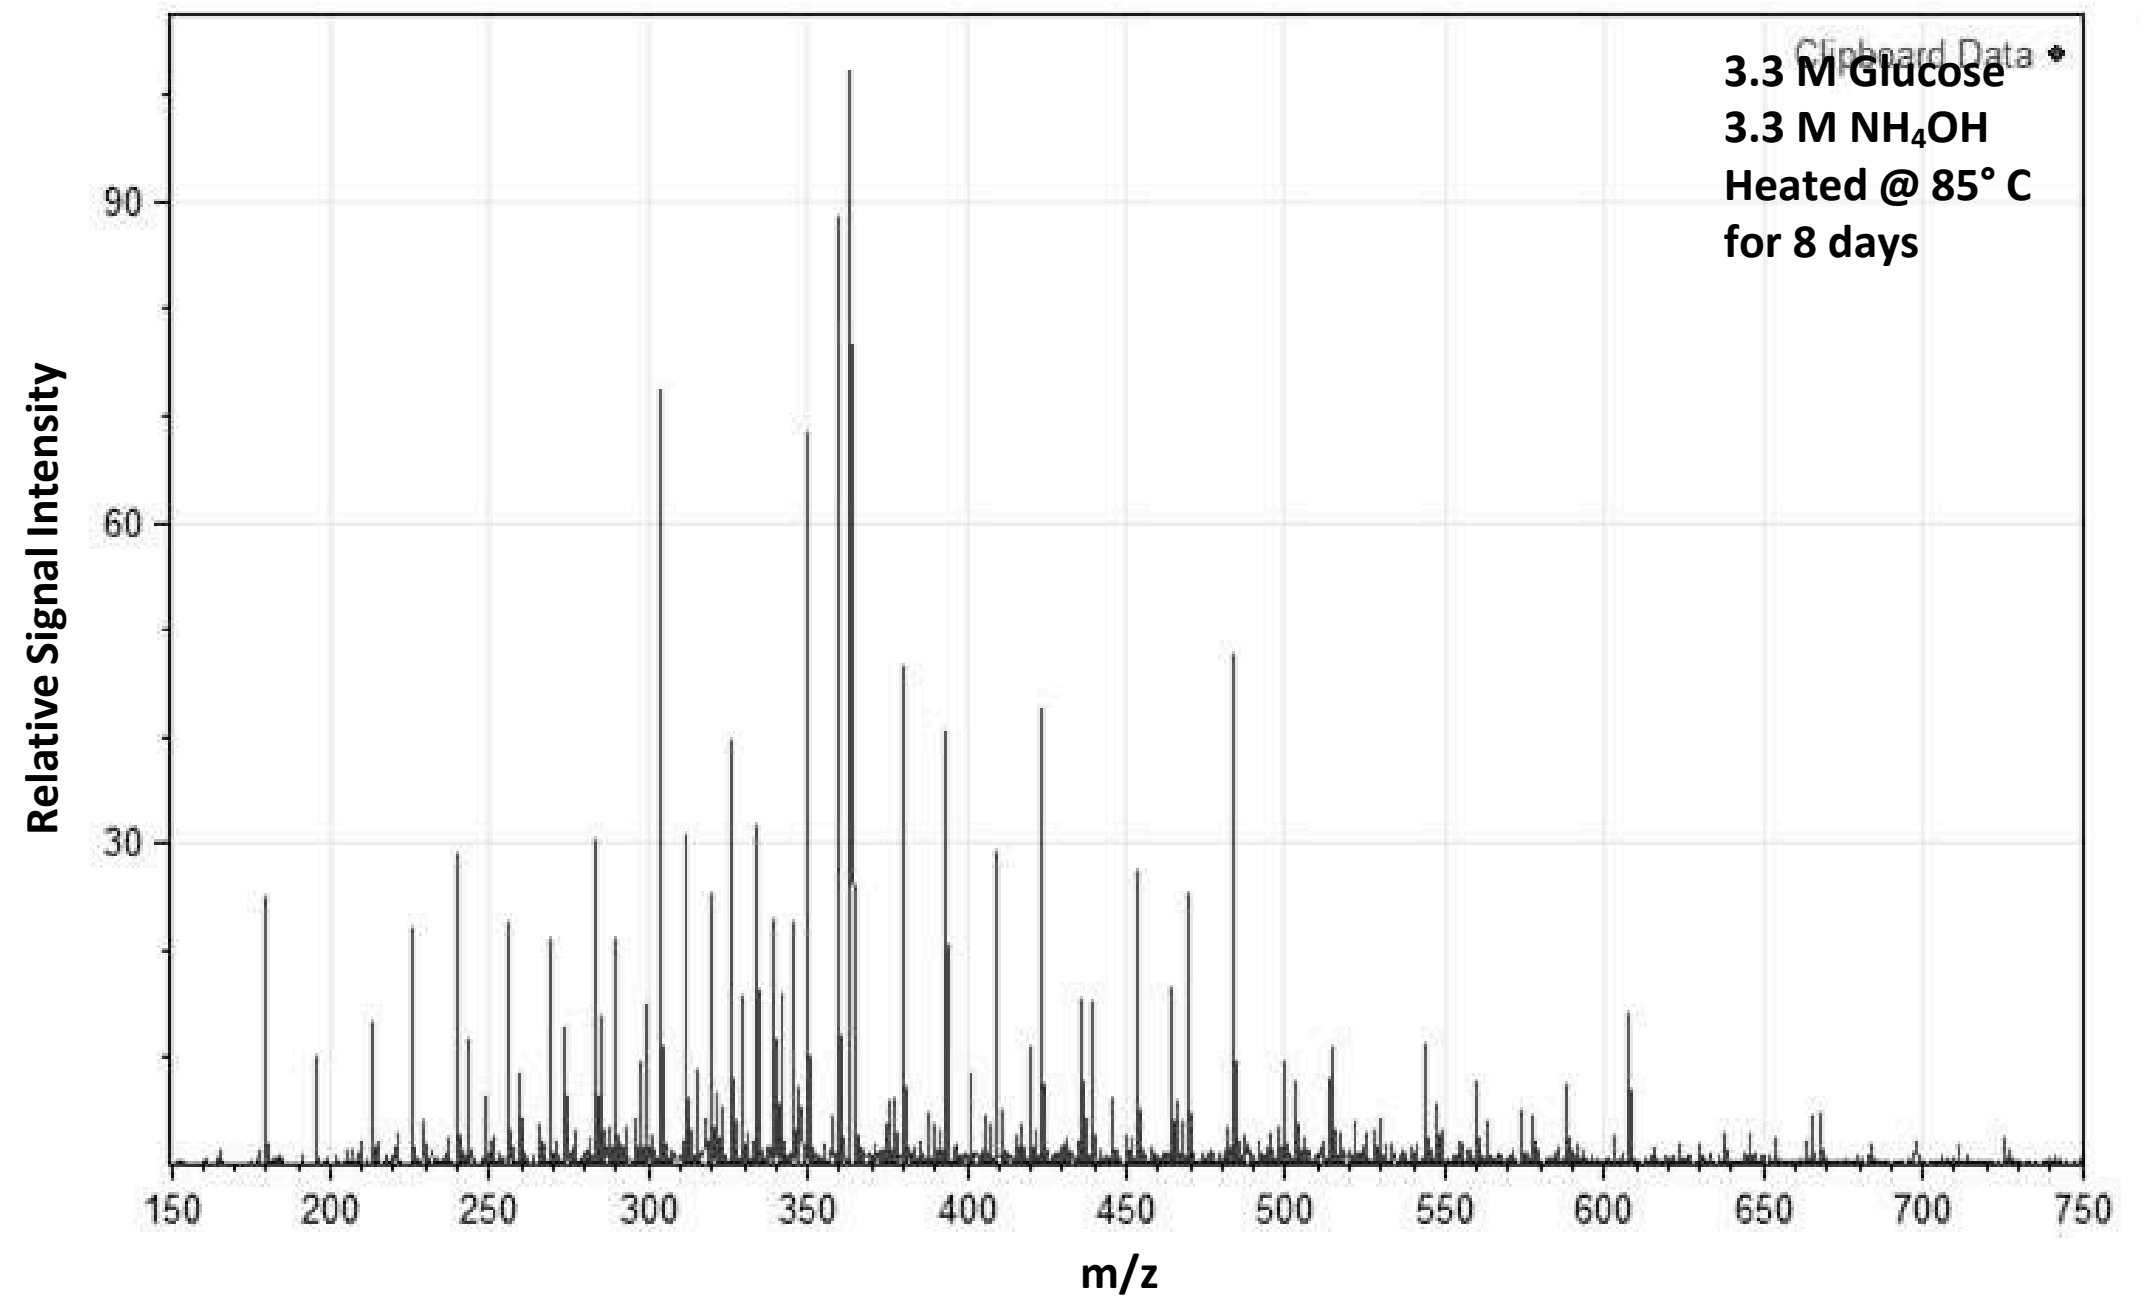

**Figure S14B.** Odd and even Kendrick Mass Defect plots of the organics extracted from the reaction of 3.3 M glucose and 3.3 M  $\text{NH}_4\text{OH}$  heated at 85° C for eight days.

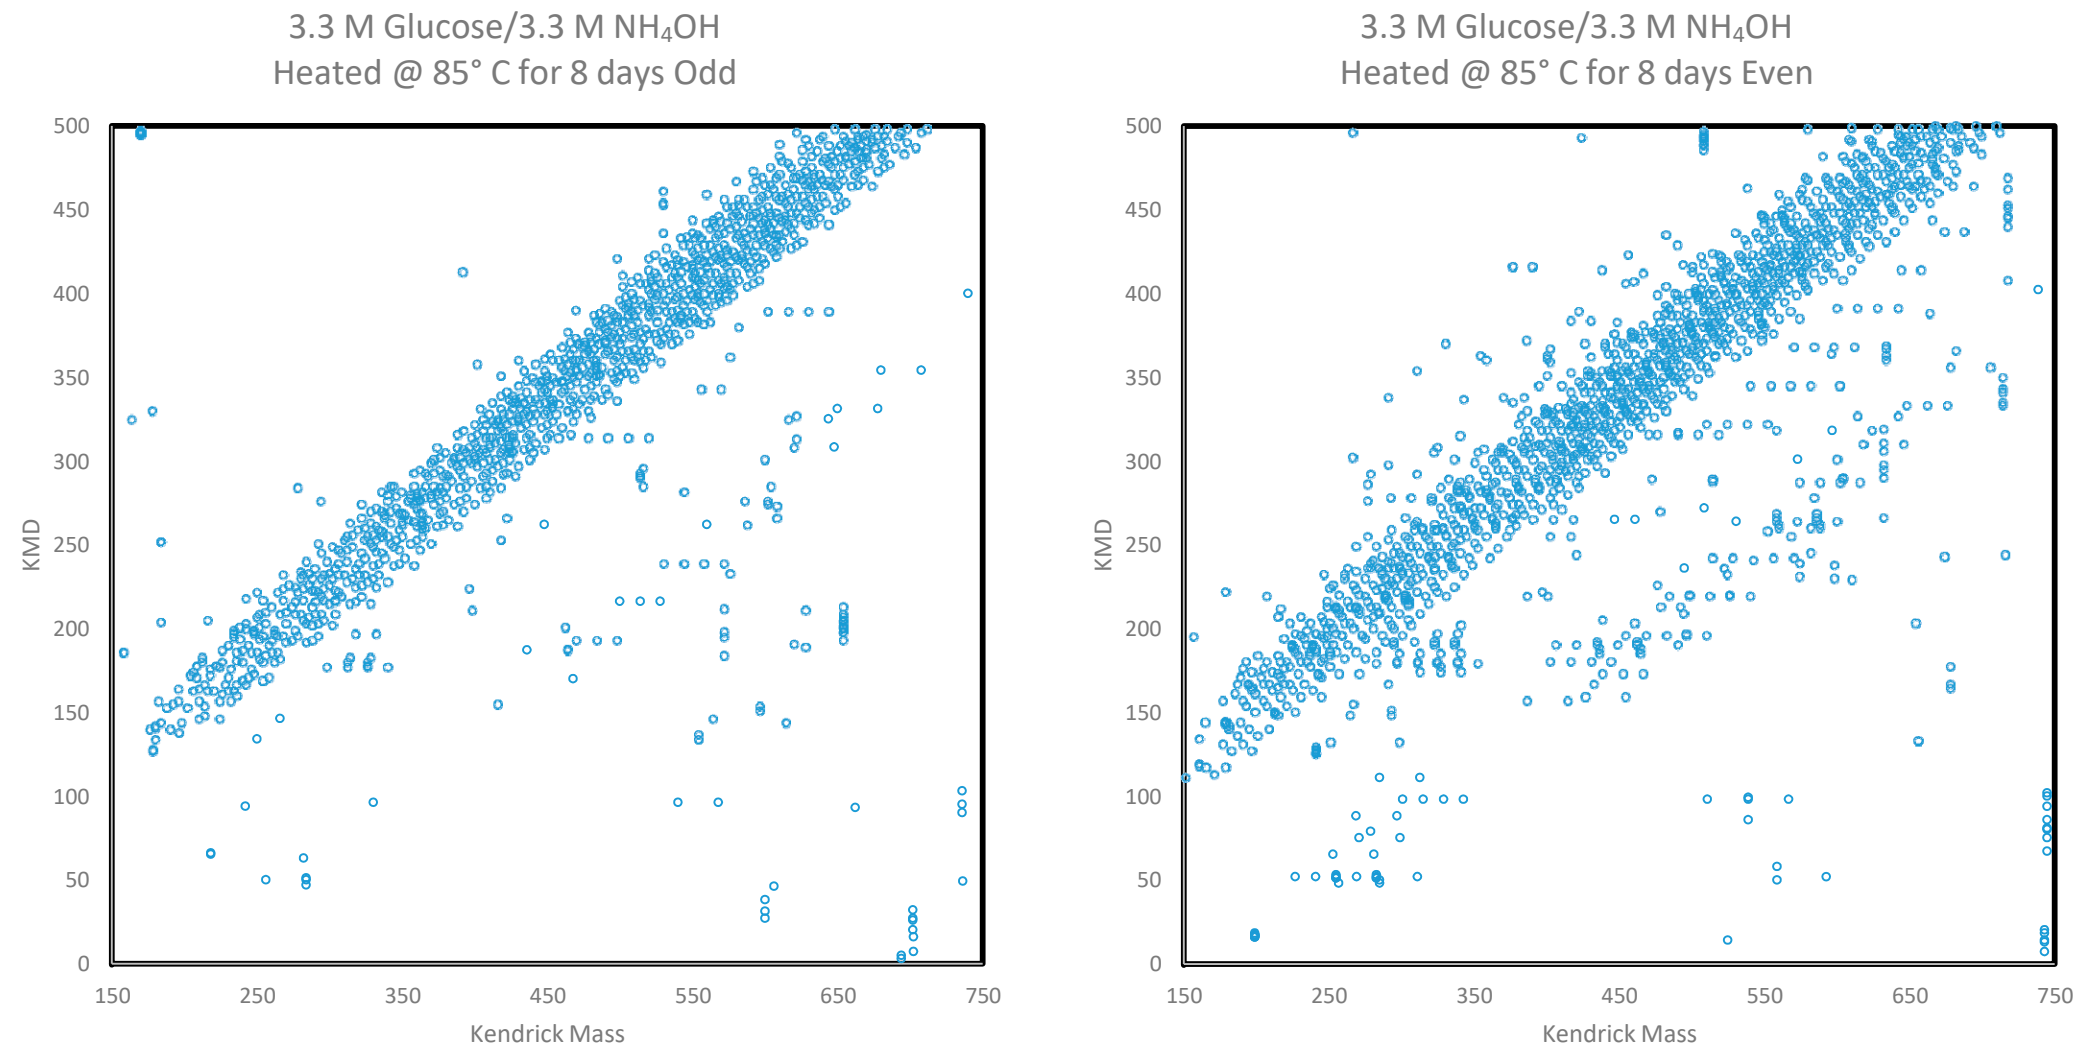

37 Glucose +  $\text{NH}_4\text{OH}$

**Figure S15A.** Negative mode ESI FT-ICR-MS spectrum of organics extracted from the reaction of 3.3 M glucose heated at 150° C for eight days.

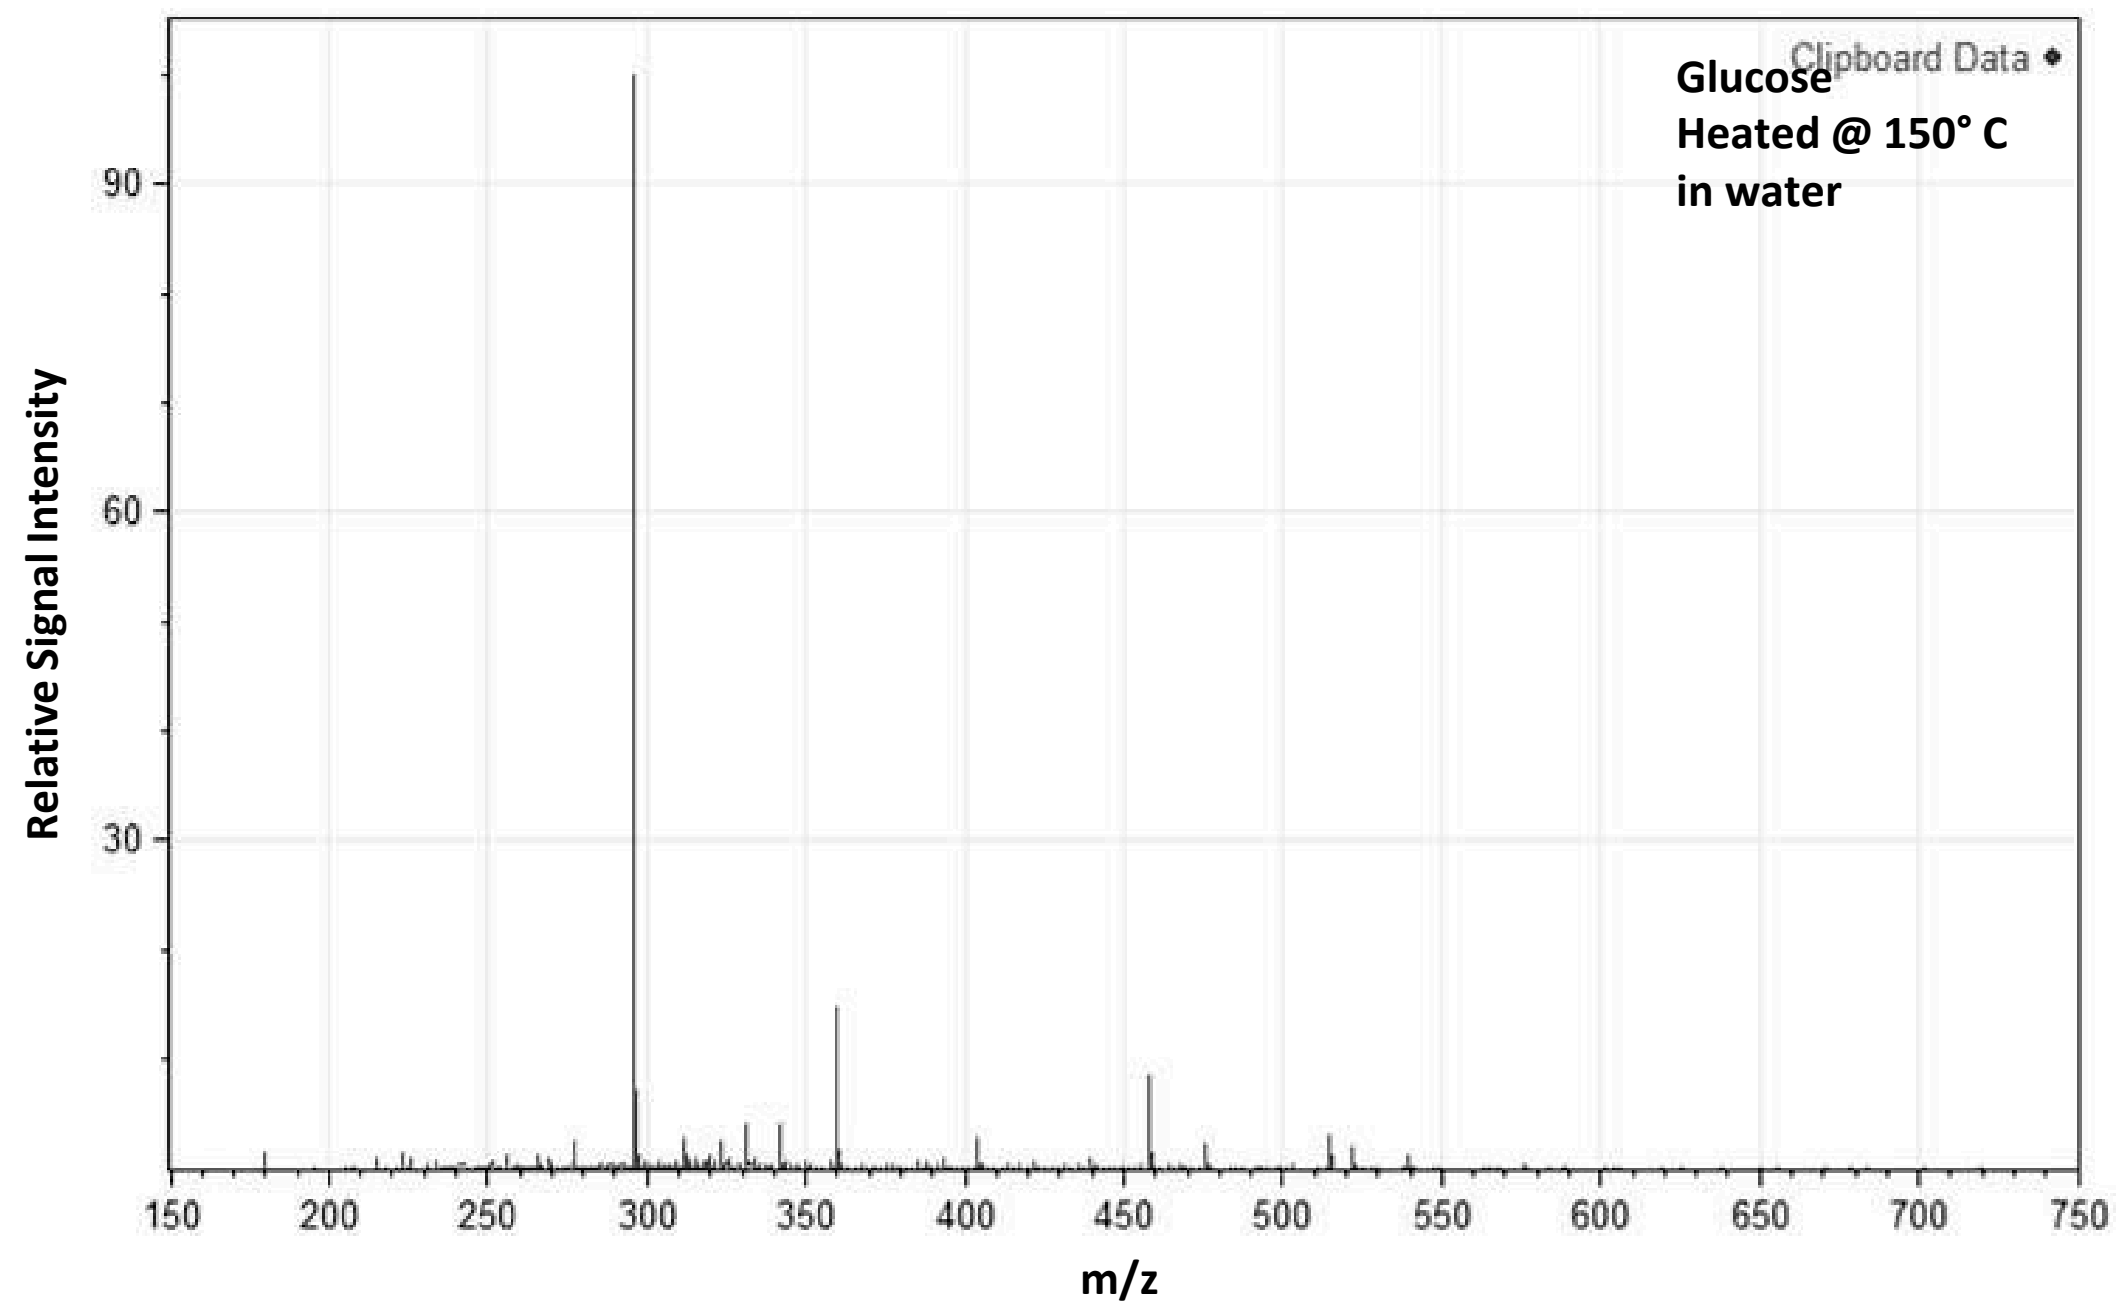

**Figure S15B.** Odd and even Kendrick Mass Defect plots of the organics extracted from the reaction of 3.3 M glucose heated at 150° C for eight days.

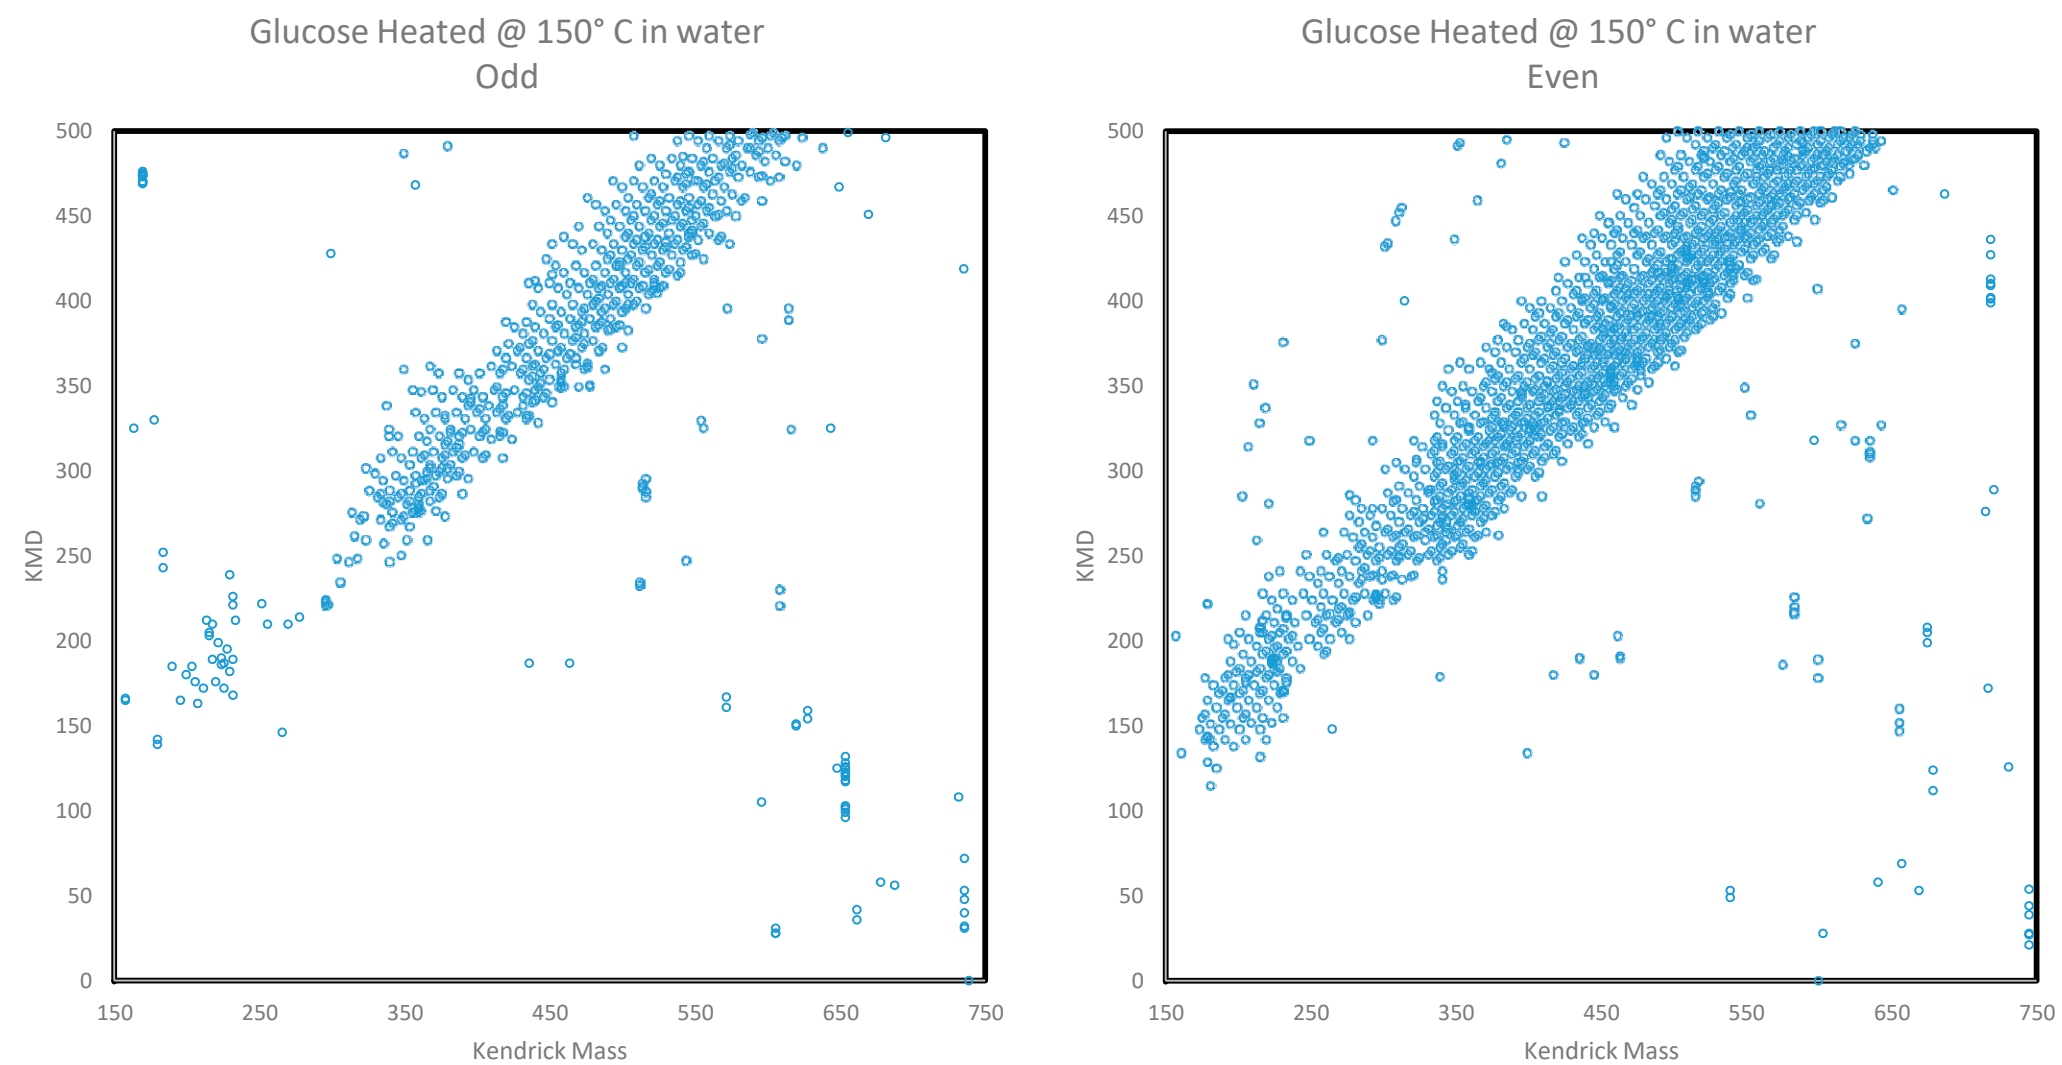

Sample 38 Glucose/Water 150° C

**Figure S16A.** Negative mode ESI FT-ICR-MS spectrum of organics extracted from the reaction of 1.95 M paraformaldehyde, 0.97 M glycolaldehyde and 0.195 M Ca(OH)<sub>2</sub> heated at 150° C for eight days.

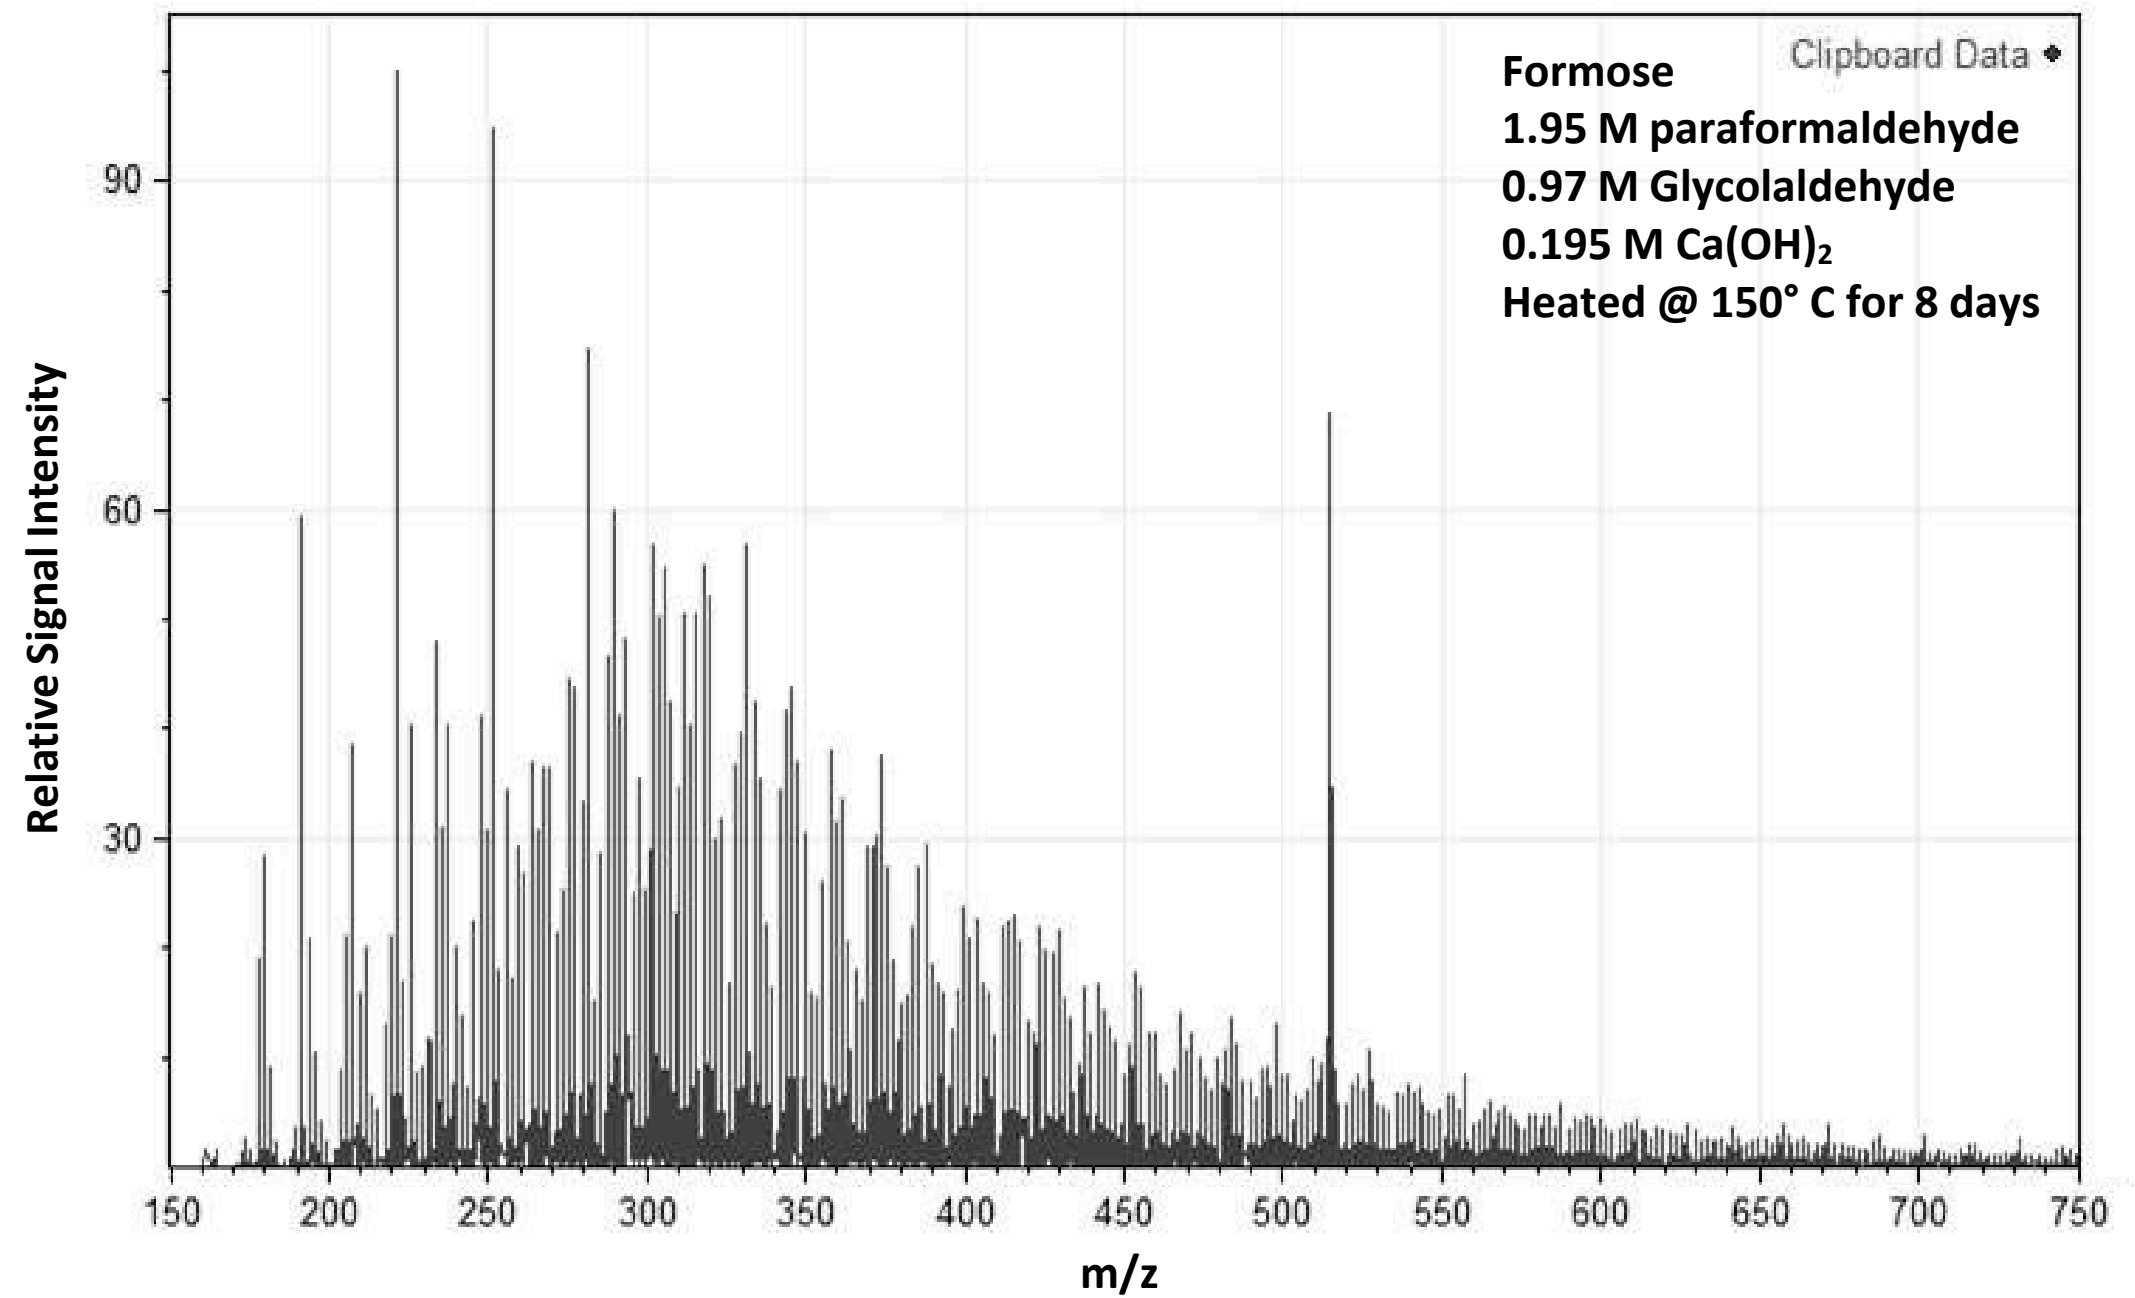



**Figure S16B.** Odd and even Kendrick Mass Defect plots of the organics extracted from the reaction of 1.95 M paraformaldehyde, 0.97 M glycolaldehyde and 0.195 M Ca(OH)<sub>2</sub> heated at 150° C for eight days.

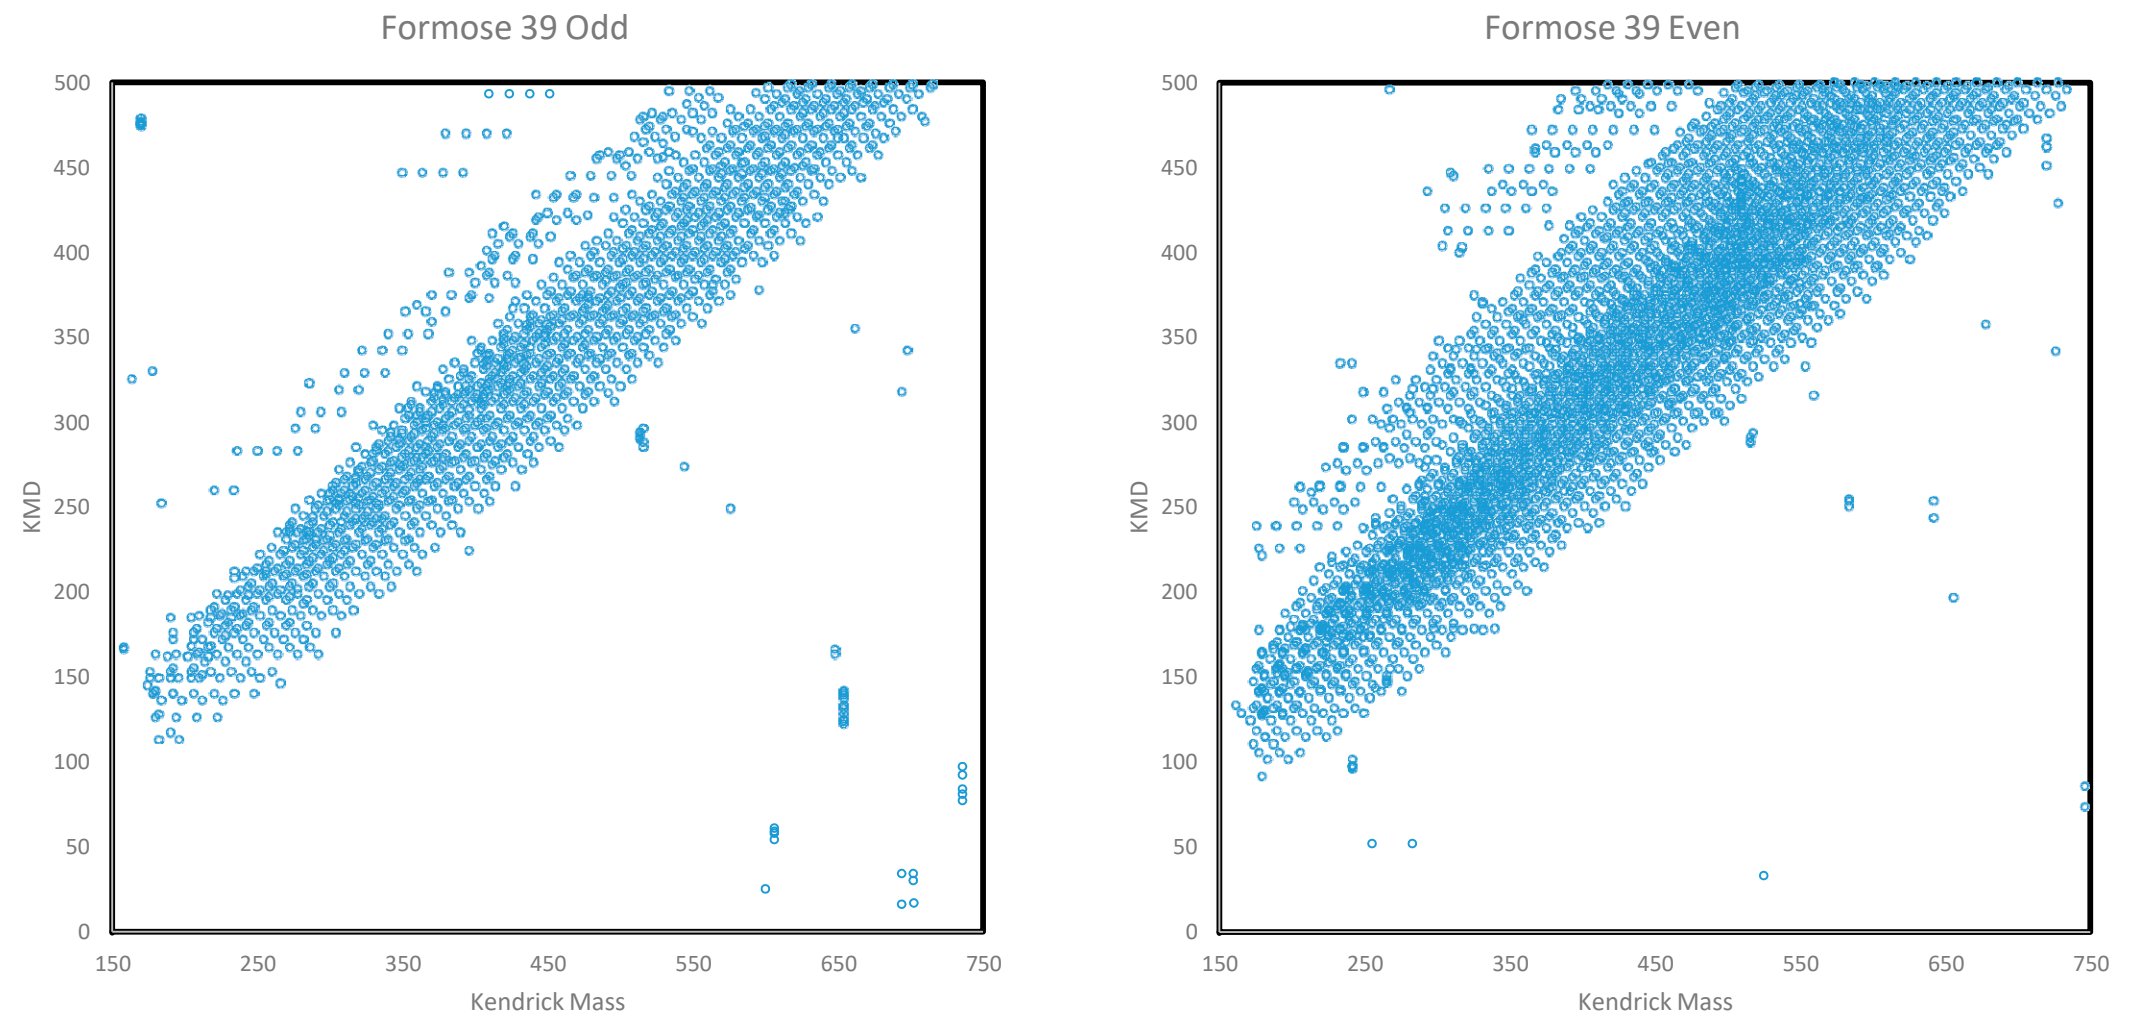

39 Formose 150 C

**Figure S17A.** Negative mode ESI FT-ICR-MS spectrum of organics extracted from the reaction of 1.95 M paraformaldehyde, 0.97 M glycolaldehyde, 0.195 M  $\text{Ca}(\text{OH})_2$  and 0.39 M  $\text{NH}_4\text{OH}$  heated at 150° C for eight days.

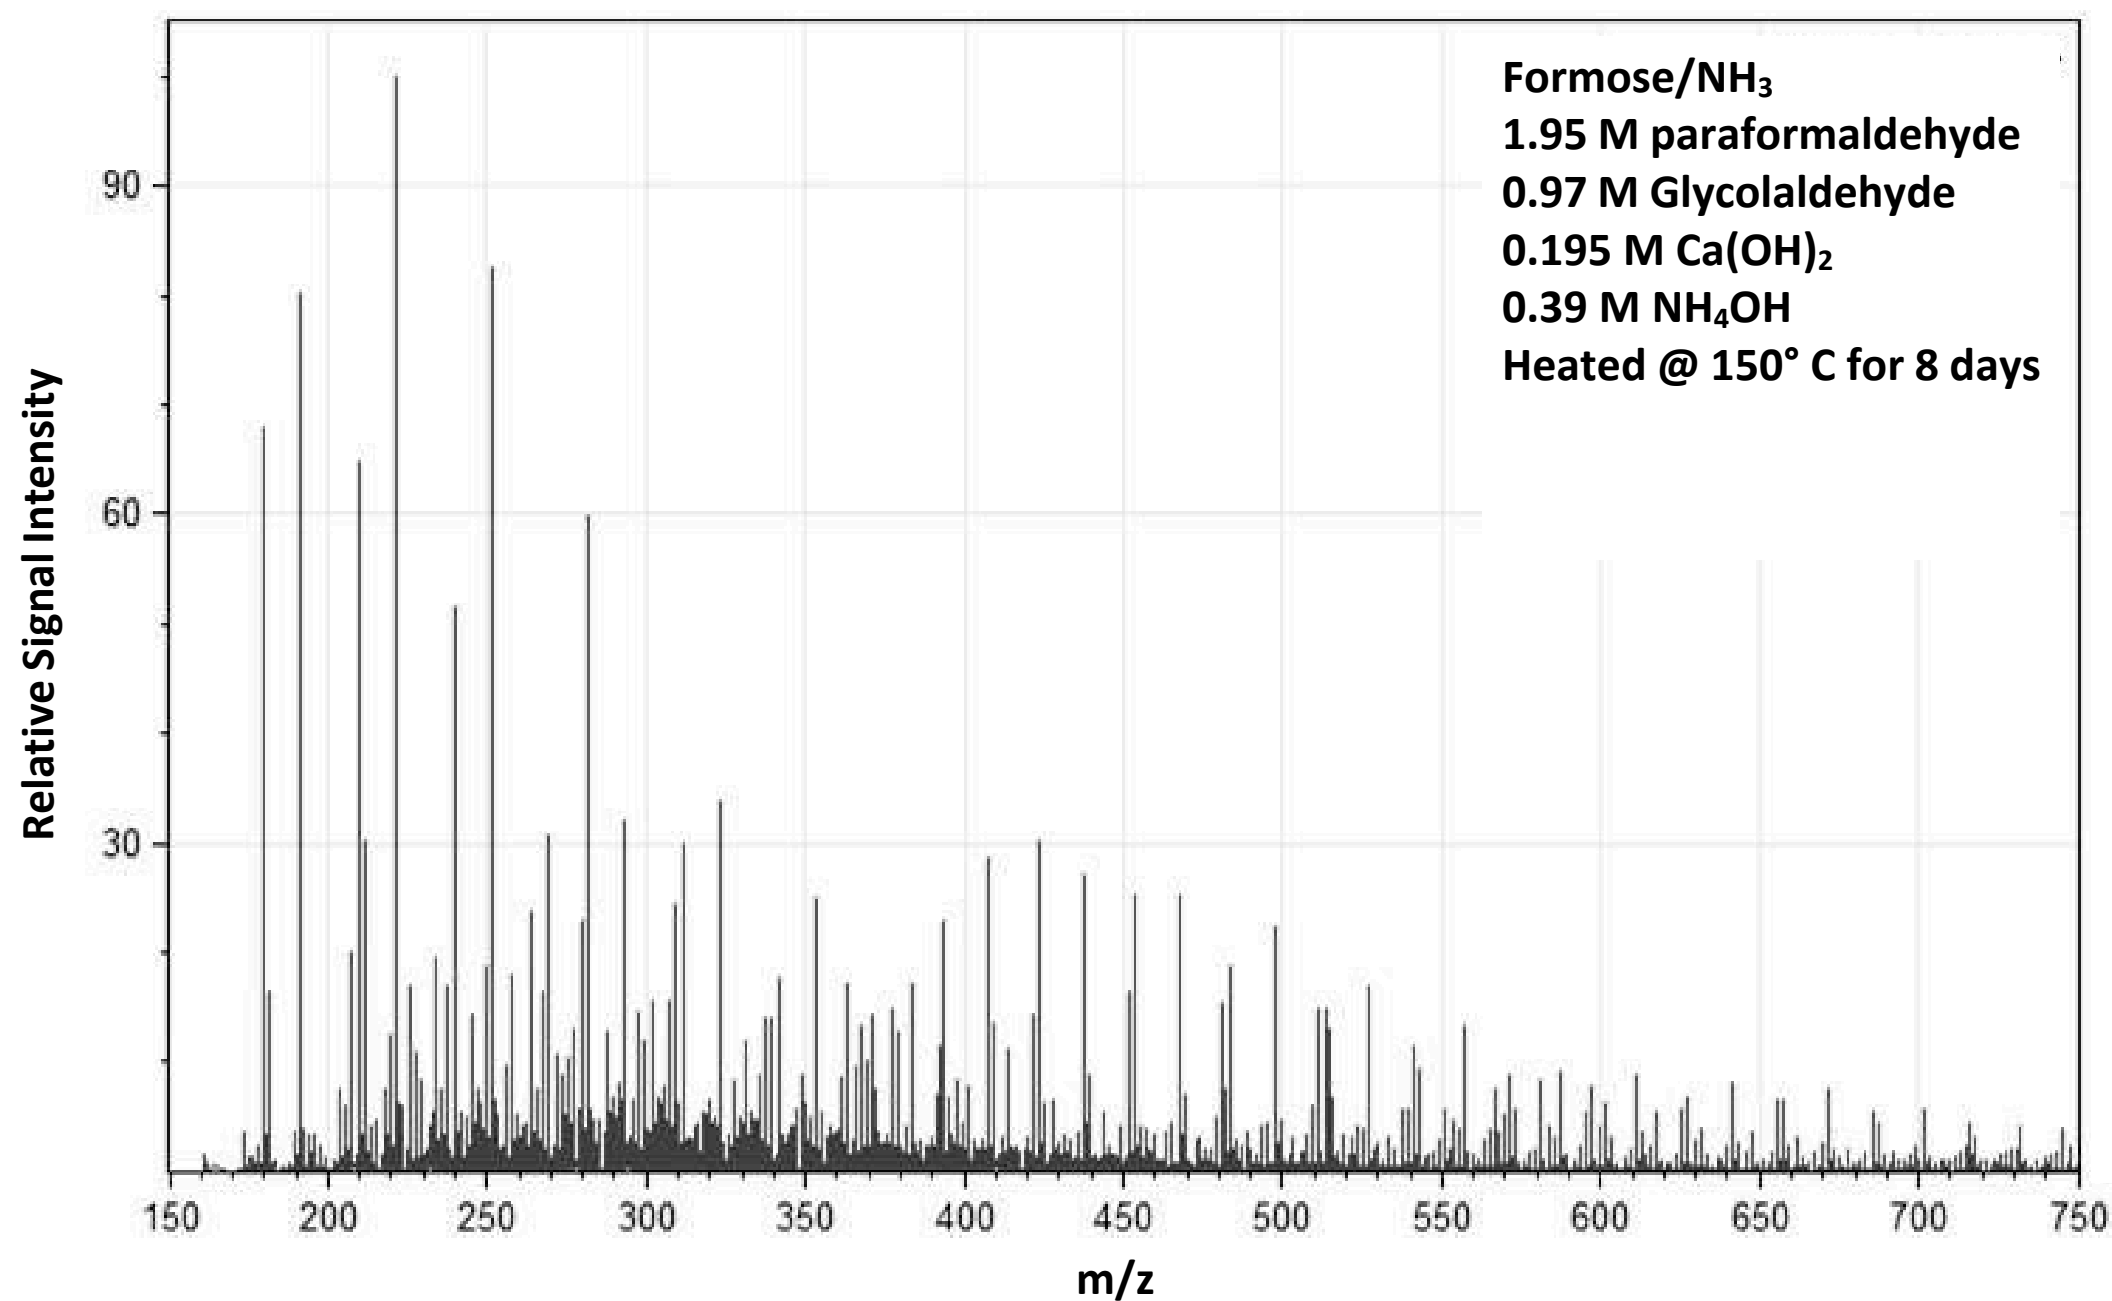

**Figure S17B.** Odd and even Kendrick Mass Defect plots of the organics extracted from the reaction of 1.95 M paraformaldehyde, 0.97 M glycolaldehyde, 0.195 M  $\text{Ca}(\text{OH})_2$  and 0.39 M  $\text{NH}_4\text{OH}$  heated at 150° C for eight days.

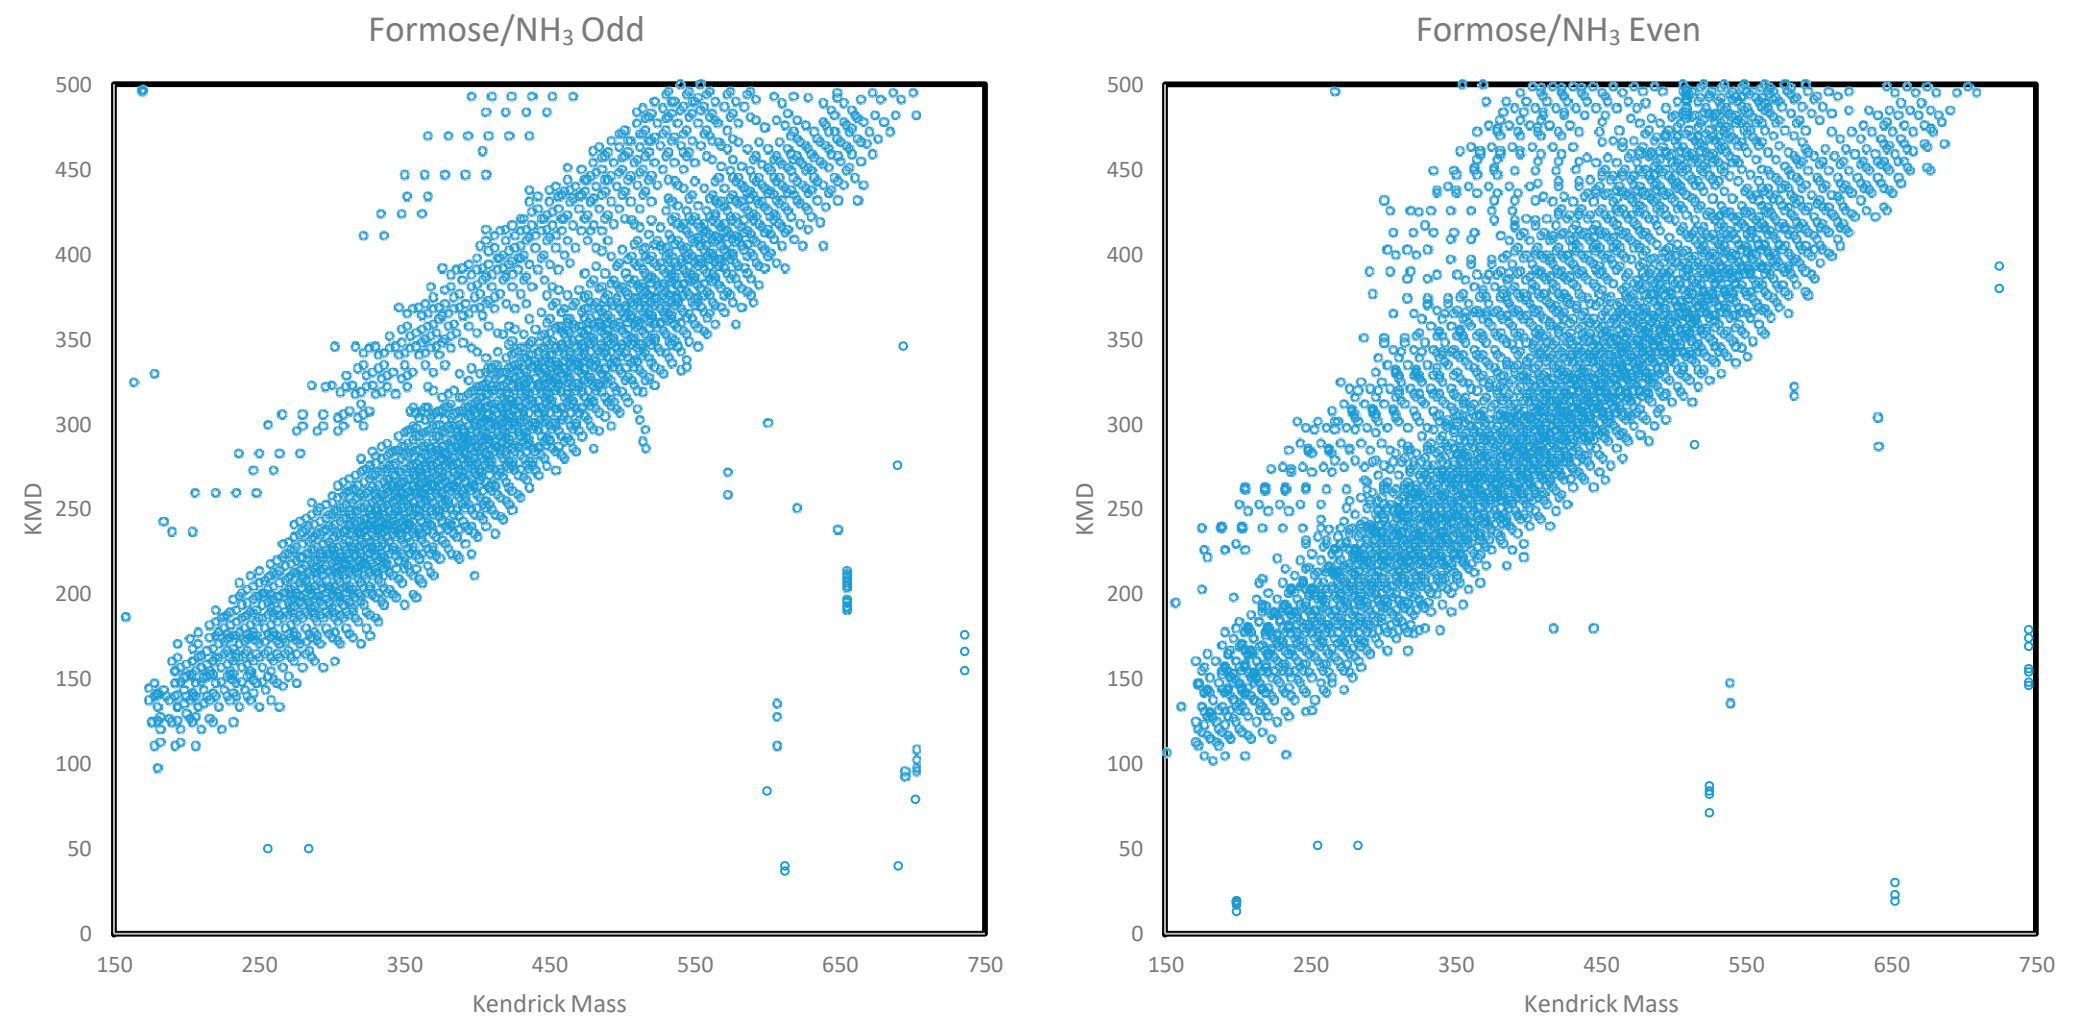

40 Formose/ $\text{NH}_3$  150° C

**Figure S18A.** Negative mode ESI FT-ICR-MS spectrum of organics extracted from the reaction of 5.55 M  $\text{NH}_4\text{OH}$ , 0.55 M  $\text{HCHO}$  and 0.05 M  $\text{CH}_3\text{CHO}$  heated at  $150^\circ\text{C}$  for 47 hours.

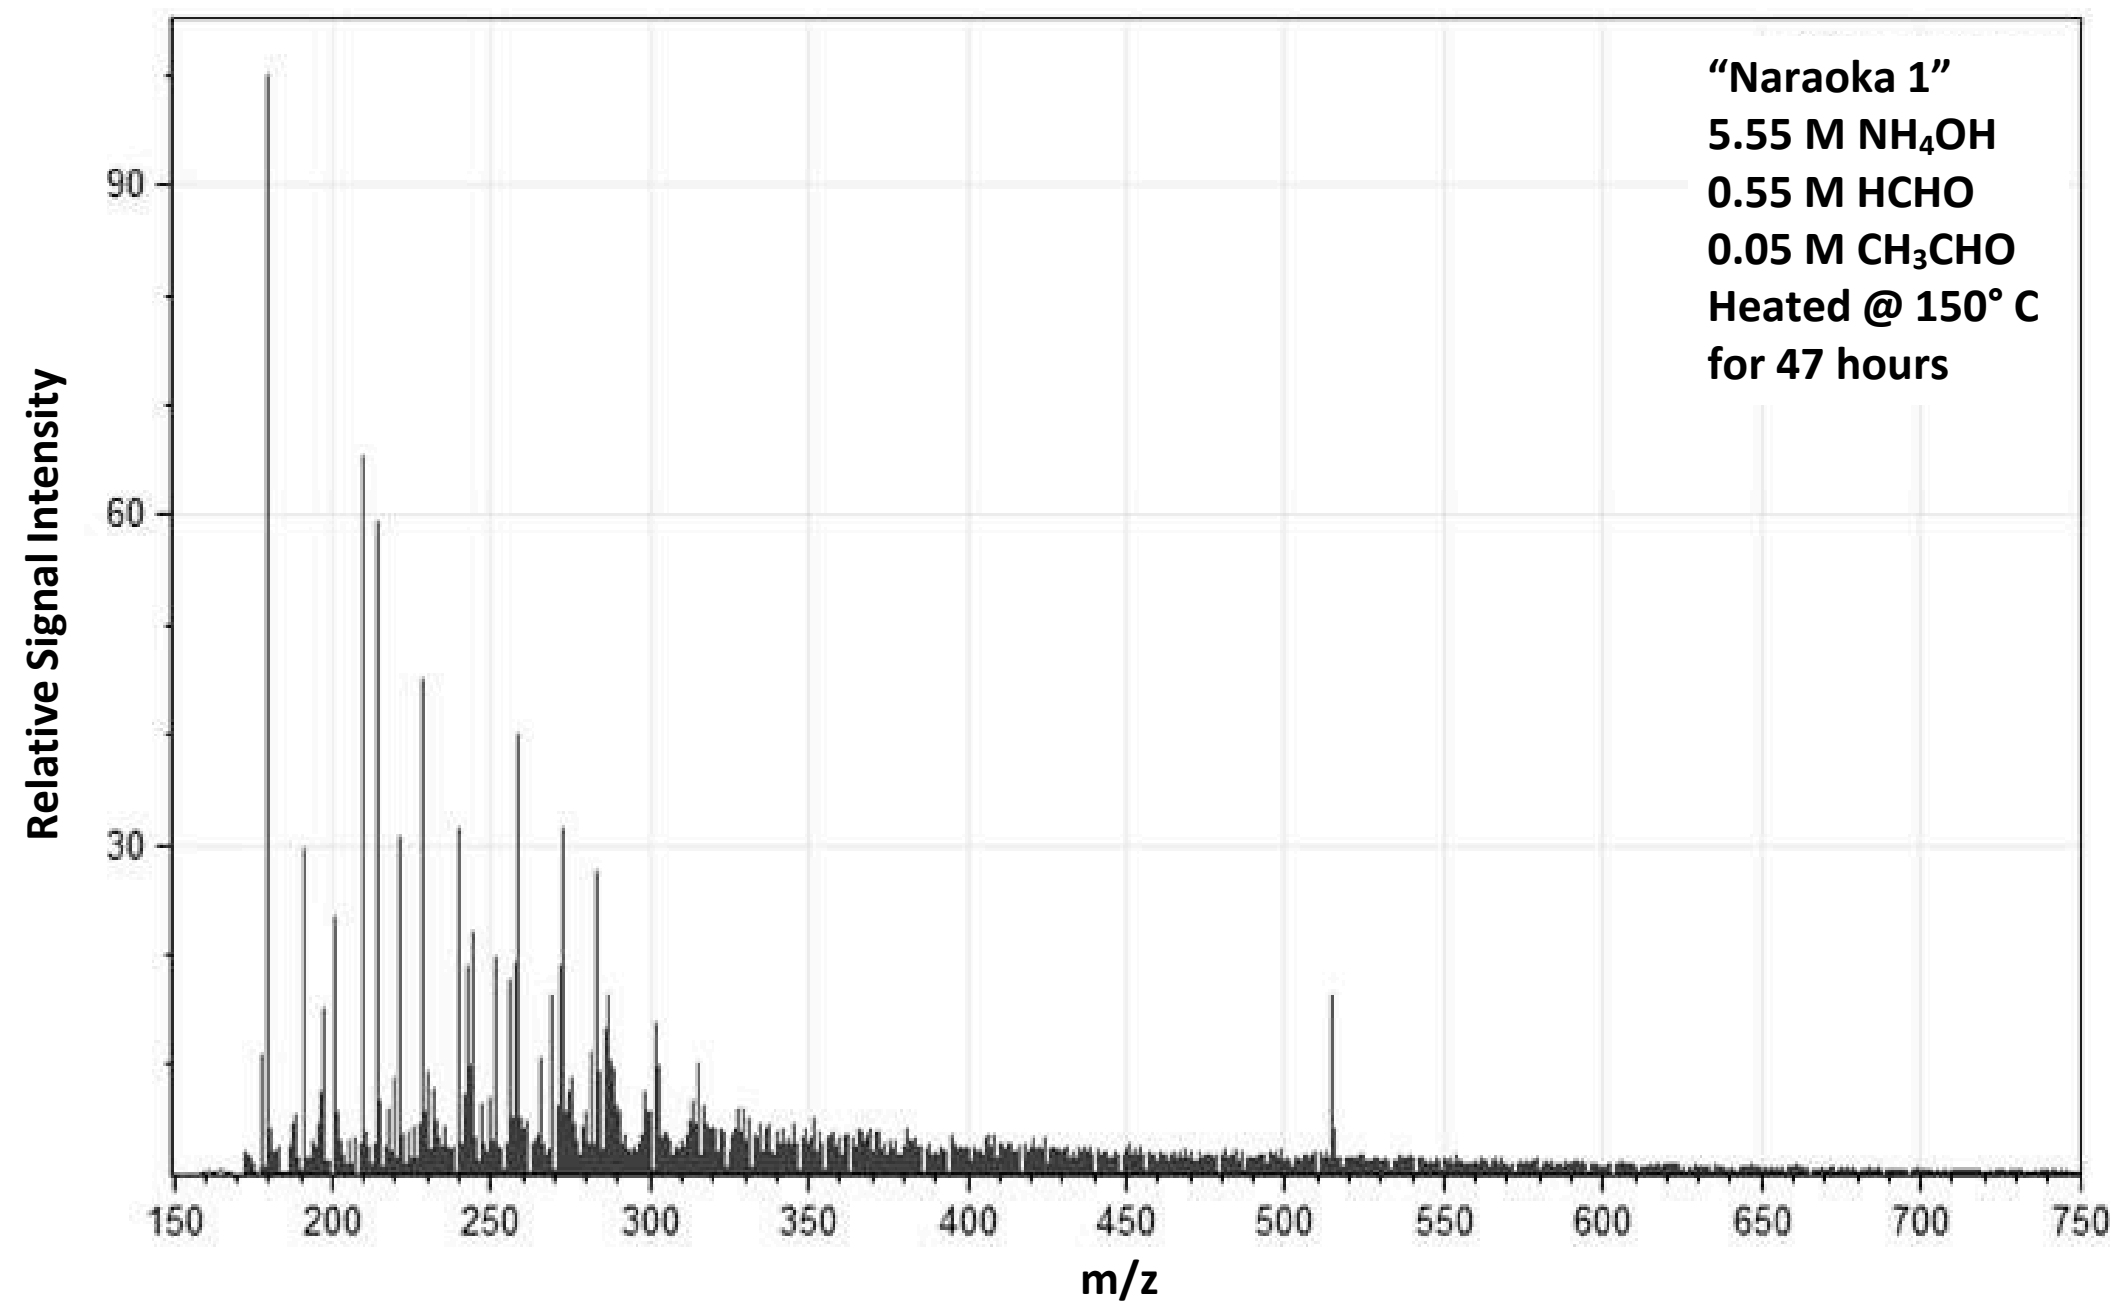

**Figure S18B.** Odd and even Kendrick Mass Defect plots of the organics extracted from the reaction of 5.55 M  $\text{NH}_4\text{OH}$ , 0.55 M HCHO and 0.05 M  $\text{CH}_3\text{CHO}$  heated at 150° C for 47 hours.

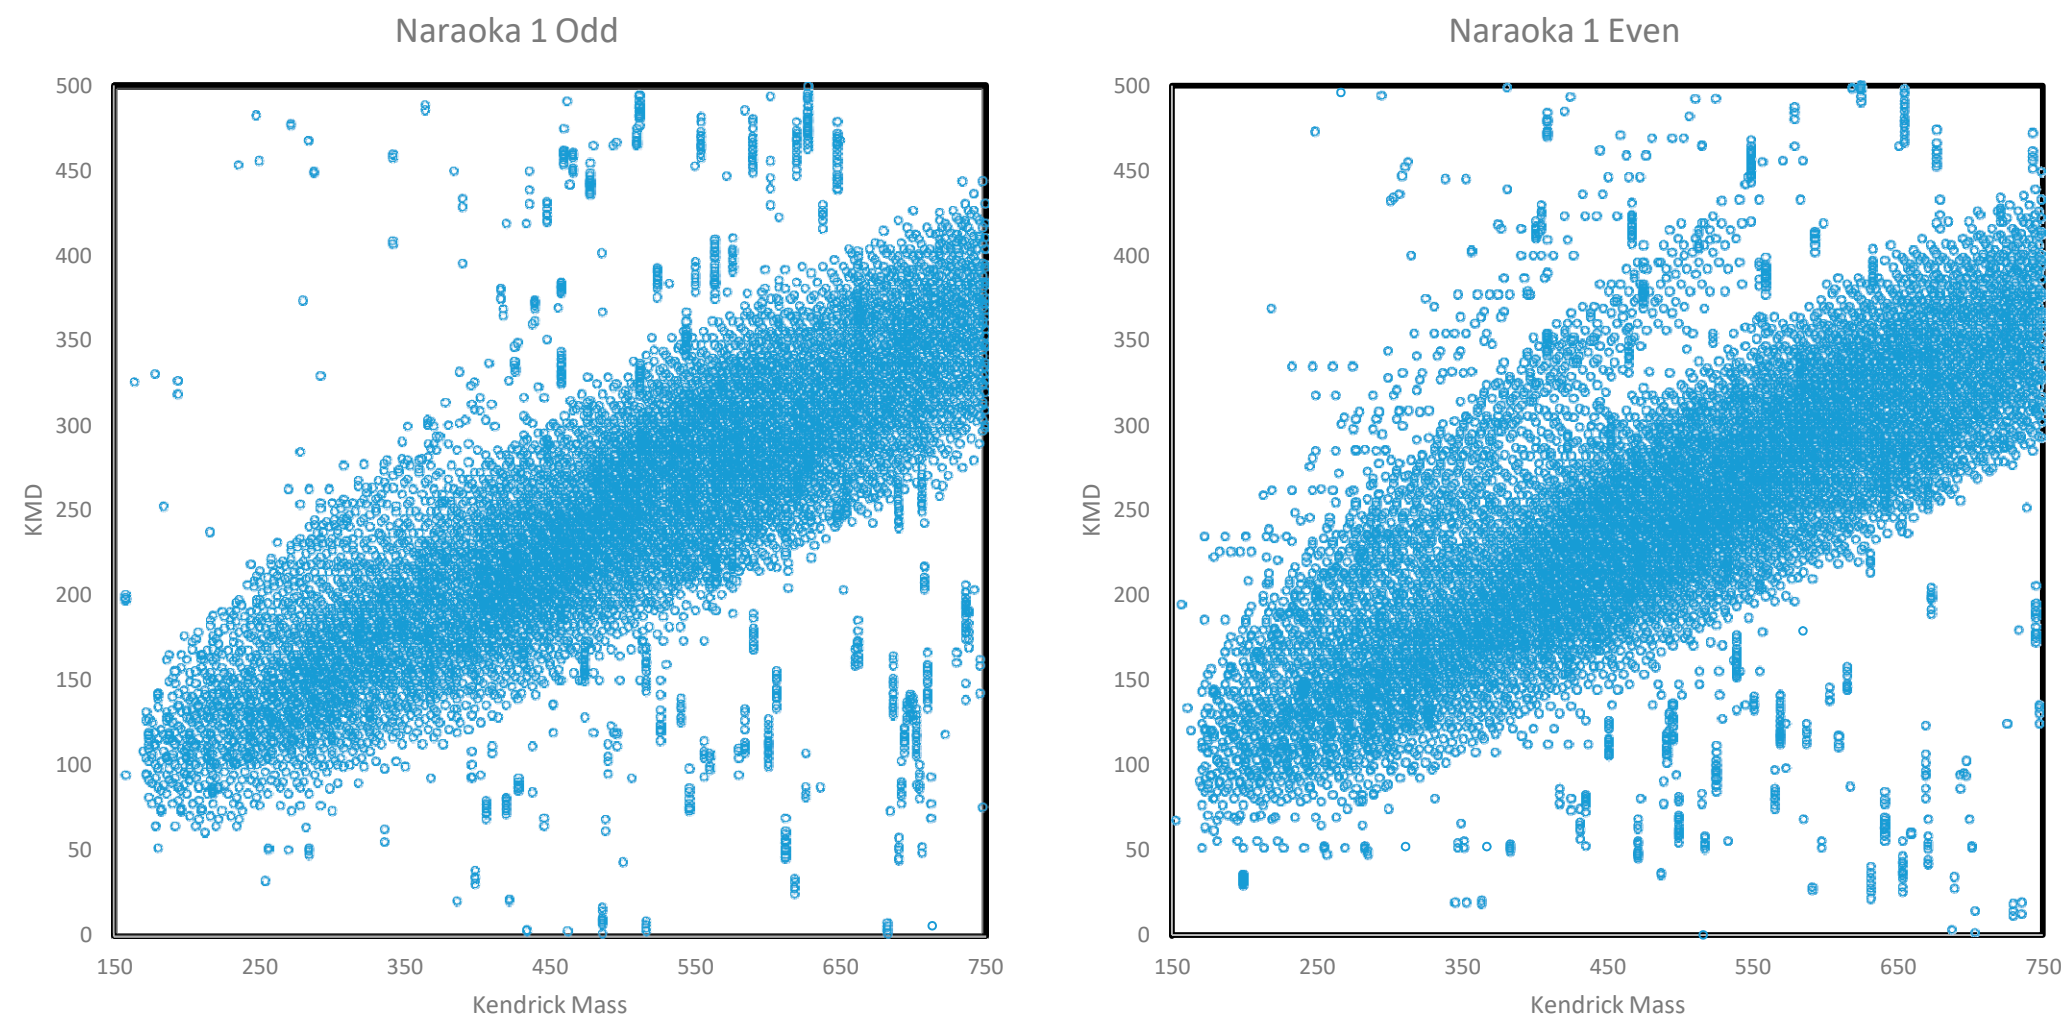

Sample 41 Naraoka 1 ( $\text{NH}_3 + \text{HCHO} + \text{CH}_3\text{CHO}$ )

**Figure S19A.** Negative mode ESI FT-ICR-MS spectrum of organics extracted from the reaction of 5.55 M NH<sub>4</sub>OH, 0.55 M HCHO, 0.05 M CH<sub>3</sub>CHO and 0.05 M glycolaldehyde heated at 150° C for 47 hours.

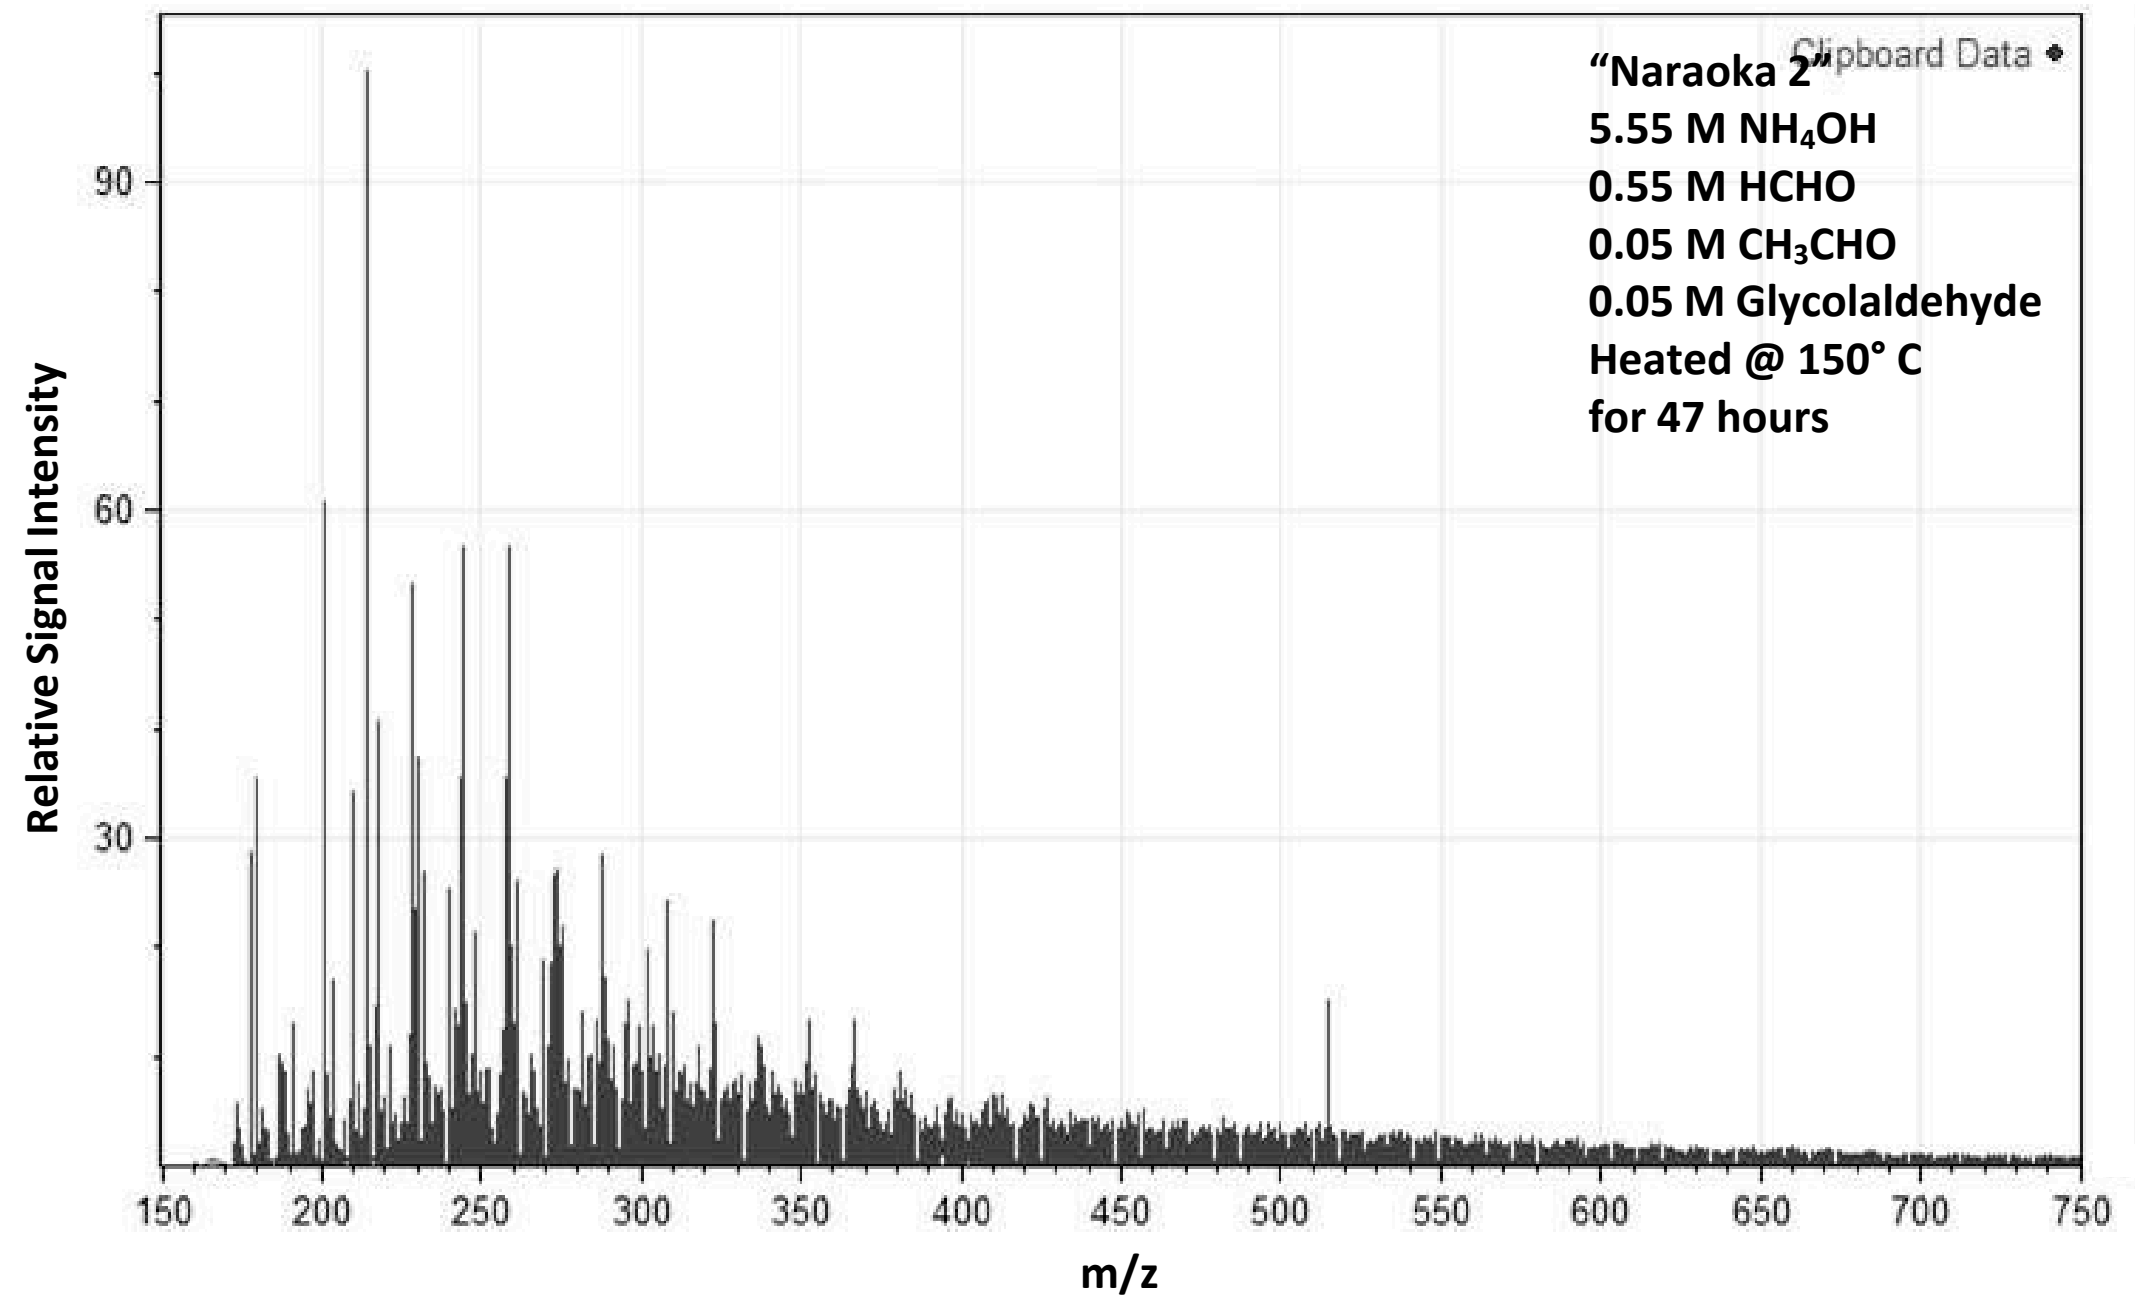

**Figure S19B.** Odd and even Kendrick Mass Defect plots of the organics extracted from the reaction of 5.55 M  $\text{NH}_4\text{OH}$ , 0.55 M  $\text{HCHO}$ , 0.05 M  $\text{CH}_3\text{CHO}$  and 0.05 M glycolaldehyde heated at 150° C for 47 hours.

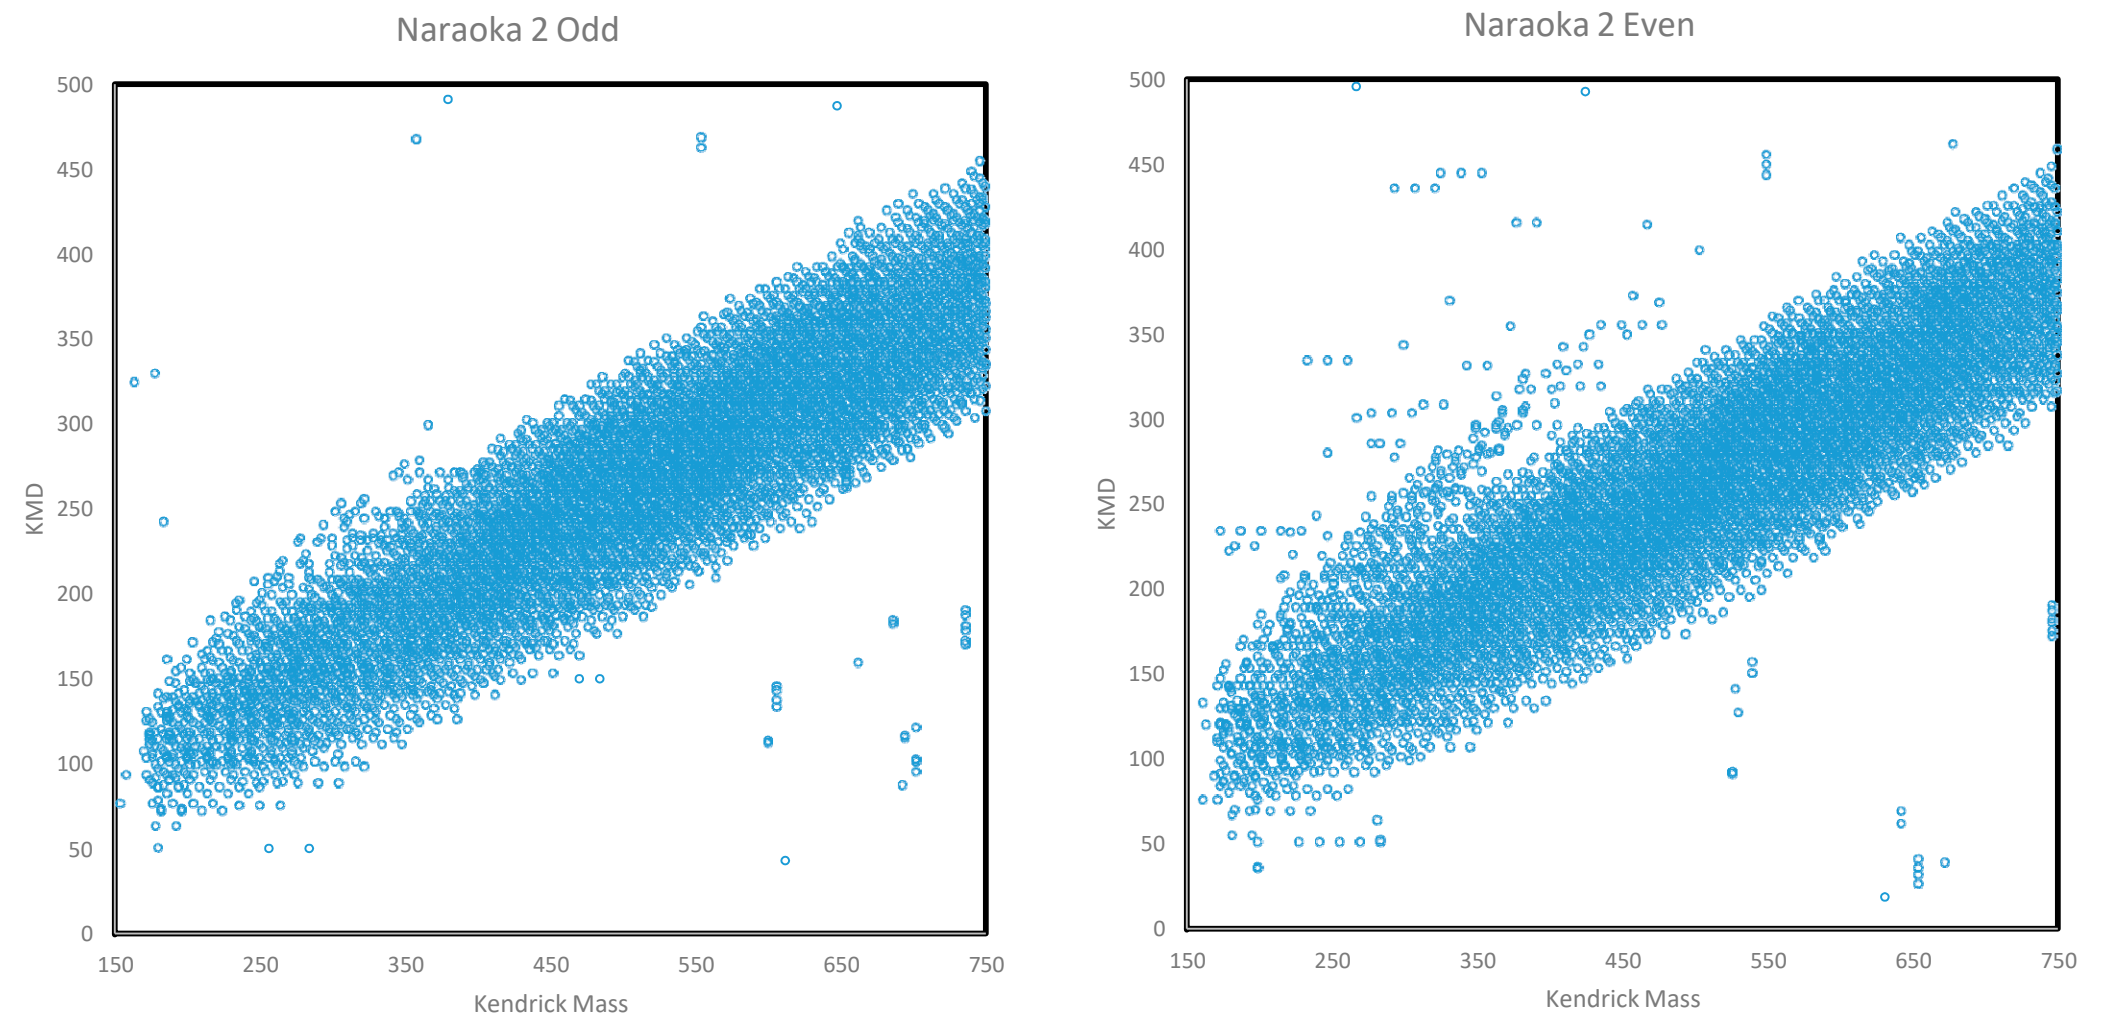

Sample 42 Naraoka 2 ( $\text{NH}_3 + \text{HCHO} + \text{CH}_3\text{CHO} + \text{Glycolaldehyde}$ )

**Figure S20A.** Negative mode ESI FT-ICR-MS spectrum of organics extracted from commercial 70% (~13.2 M) aqueous glycolonitrile solution which had been left sealed from the manufacturer after reaction at ~25° C for ~ 20 years.

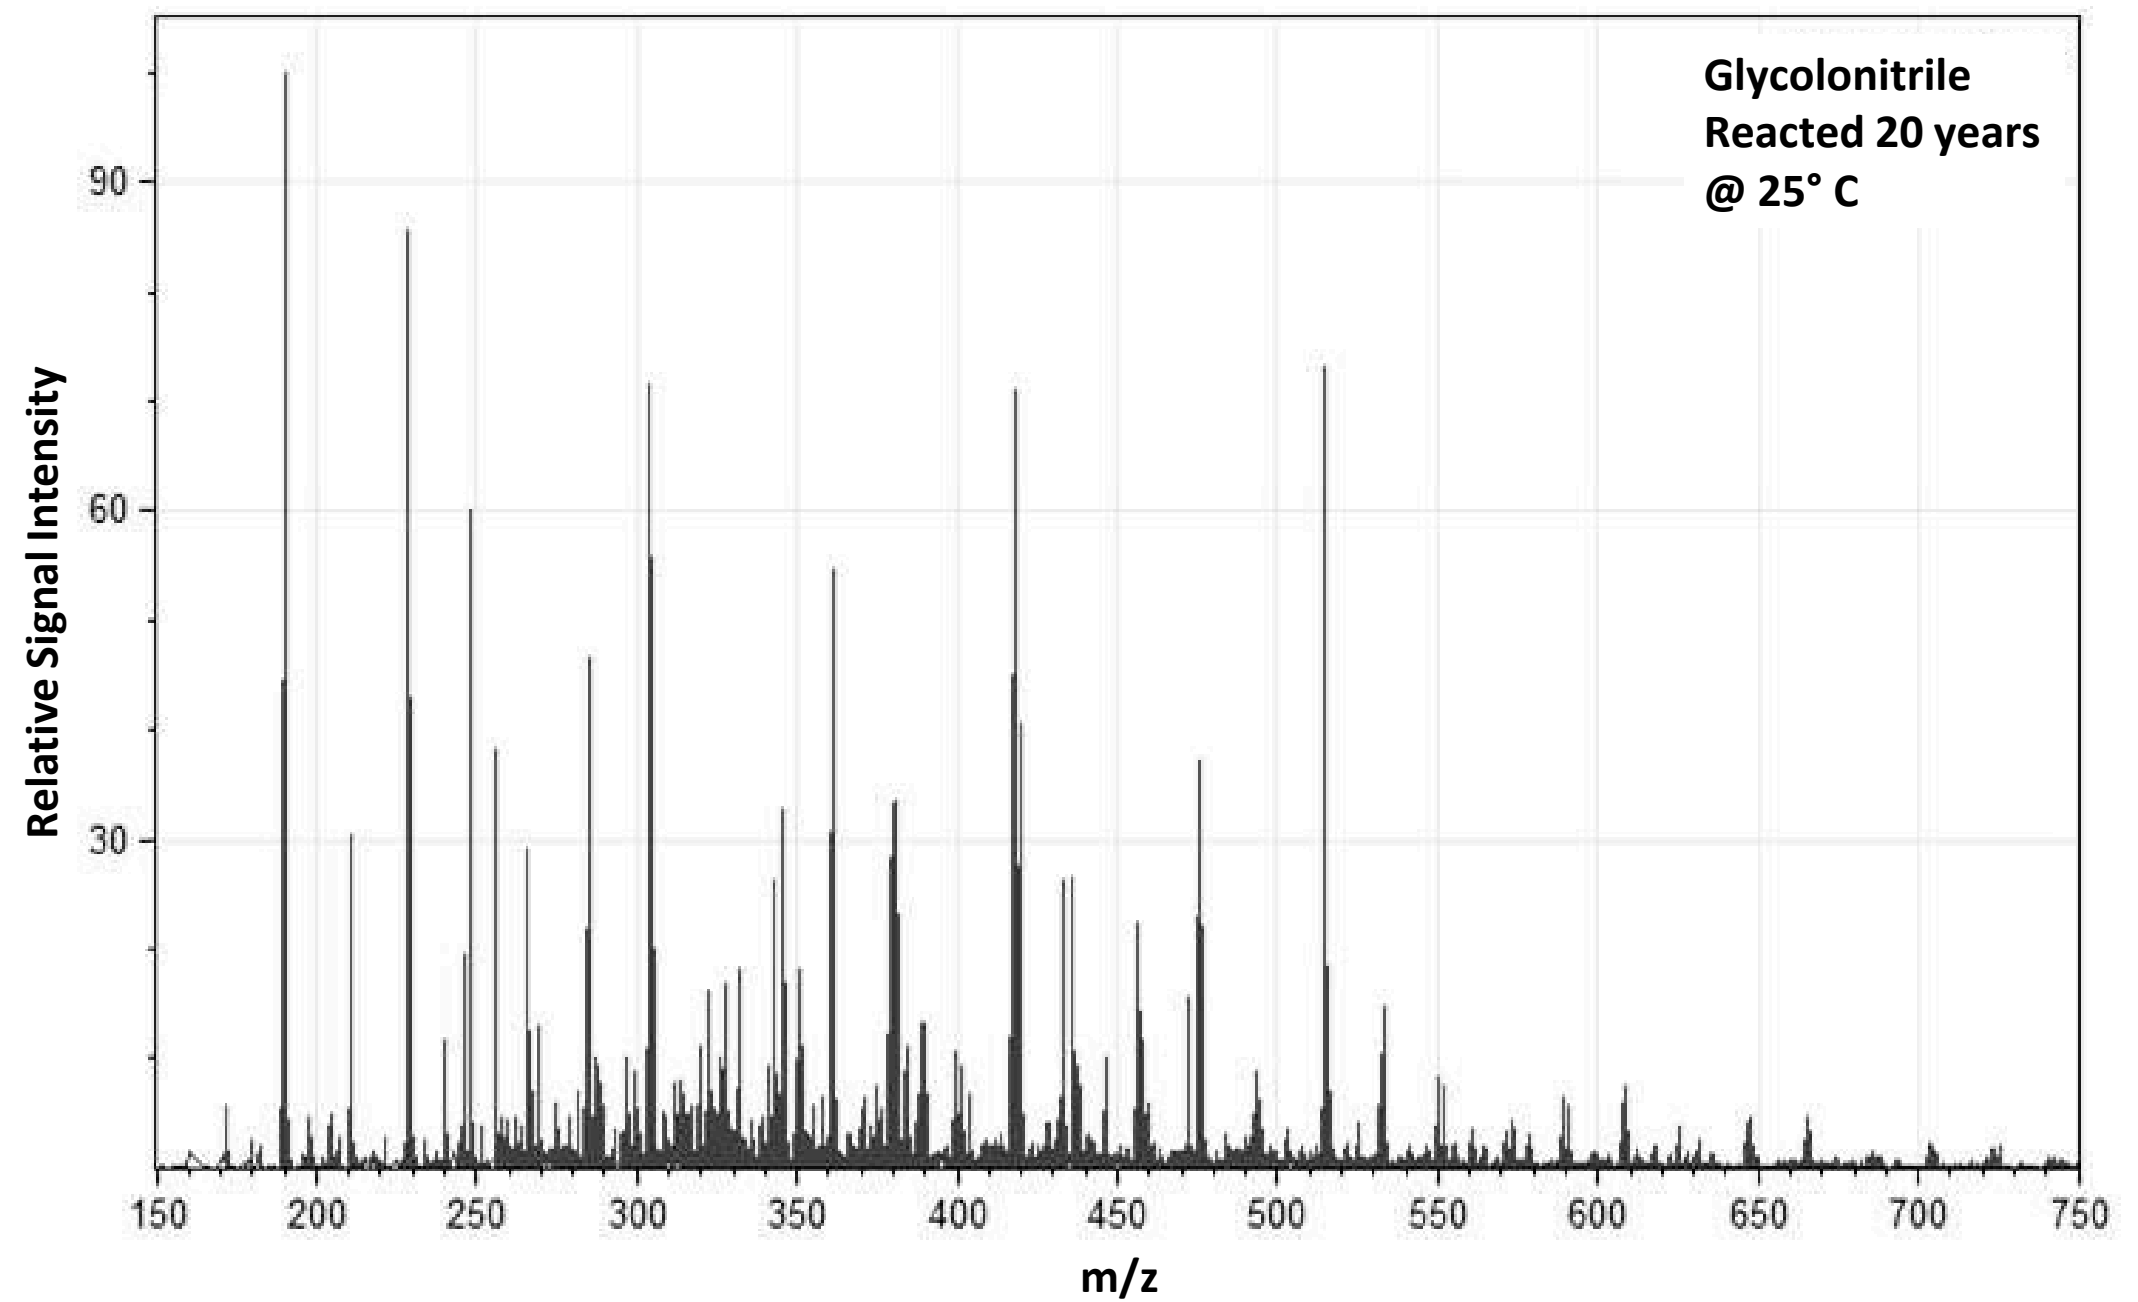



**Figure S20B.** Odd and even Kendrick Mass Defect plots of the organics extracted from commercial 70% (~13.2 M) aqueous glycolonitrile solution which had been left sealed from the manufacturer after reaction at ~25° C for ~ 20 years.

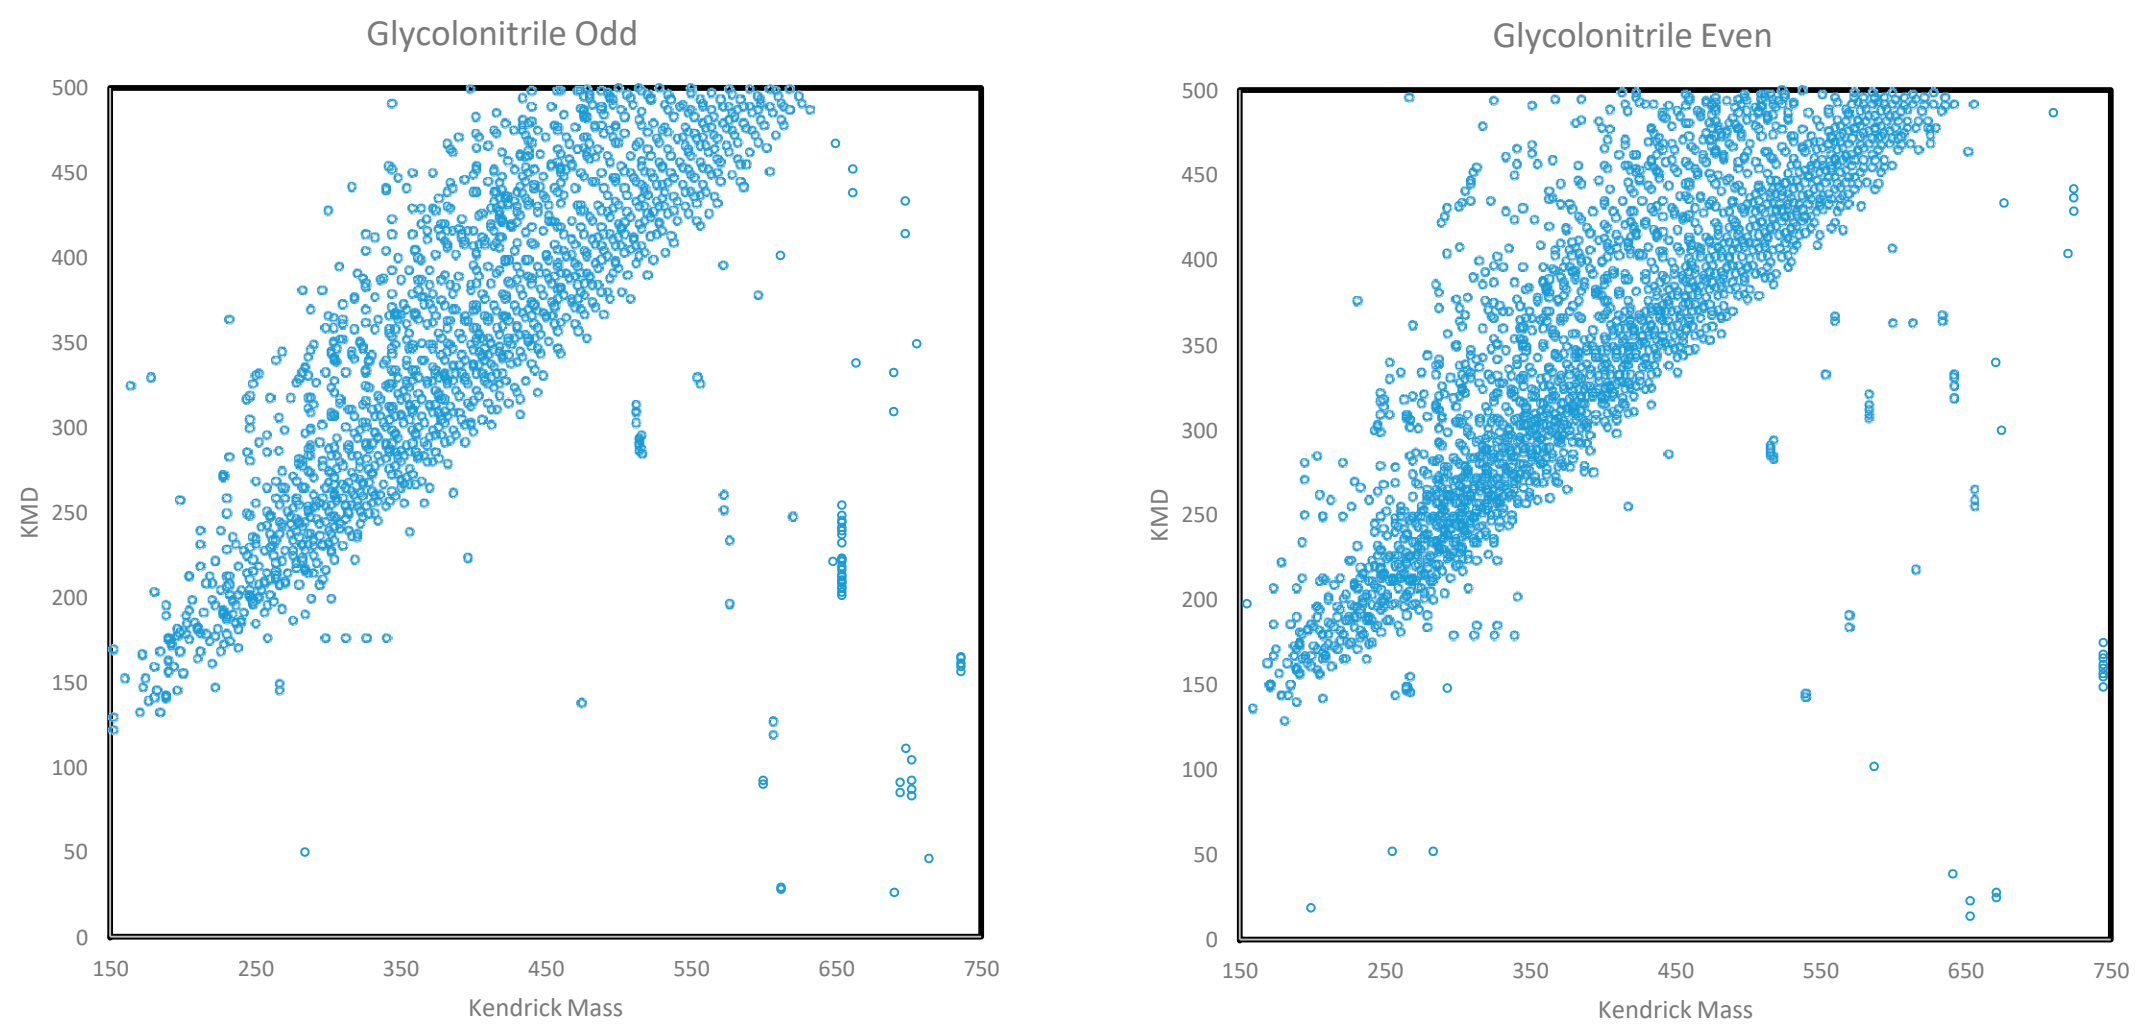

43 Glycolonitrile (20 year reaction in water at 25° C)

**Figure S21A.** Negative mode ESI FT-ICR-MS spectrum of organics extracted from a Miller Urey electric discharge reaction prepared from CH<sub>4</sub>, NH<sub>3</sub> and H<sub>2</sub>O (see reference 49 in the main text) and frozen at -20° C for ~25 years.

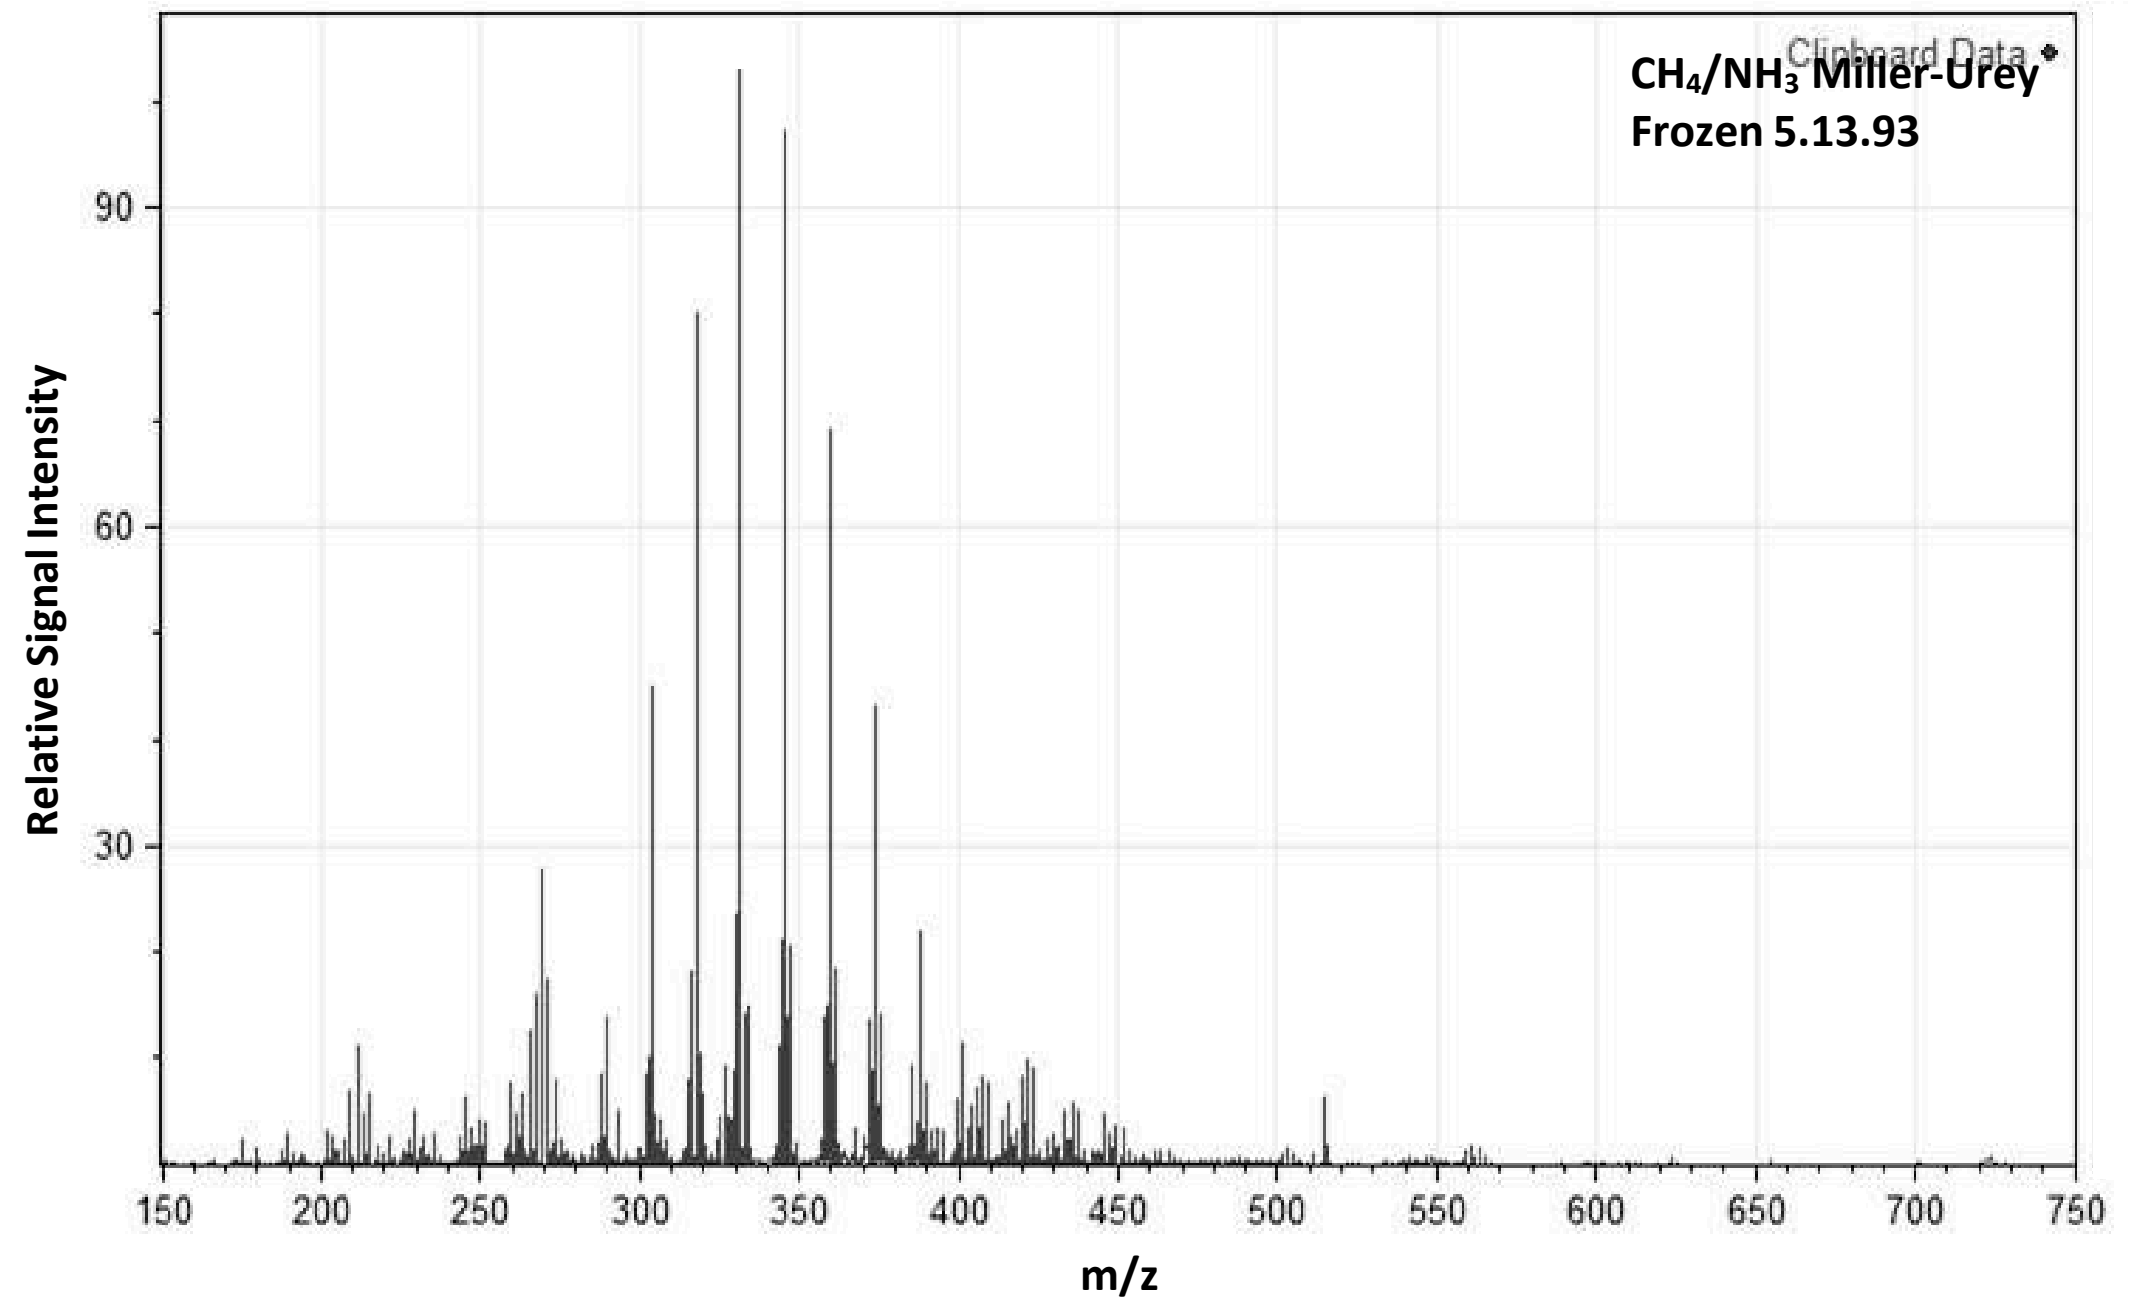

**Figure S21B.** Odd and even Kendrick Mass Defect plots of the organics extracted from a Miller Urey electric discharge reaction prepared from CH<sub>4</sub>, NH<sub>3</sub> and H<sub>2</sub>O (see reference 49 in the main text) and frozen at -20° C for ~25 years.

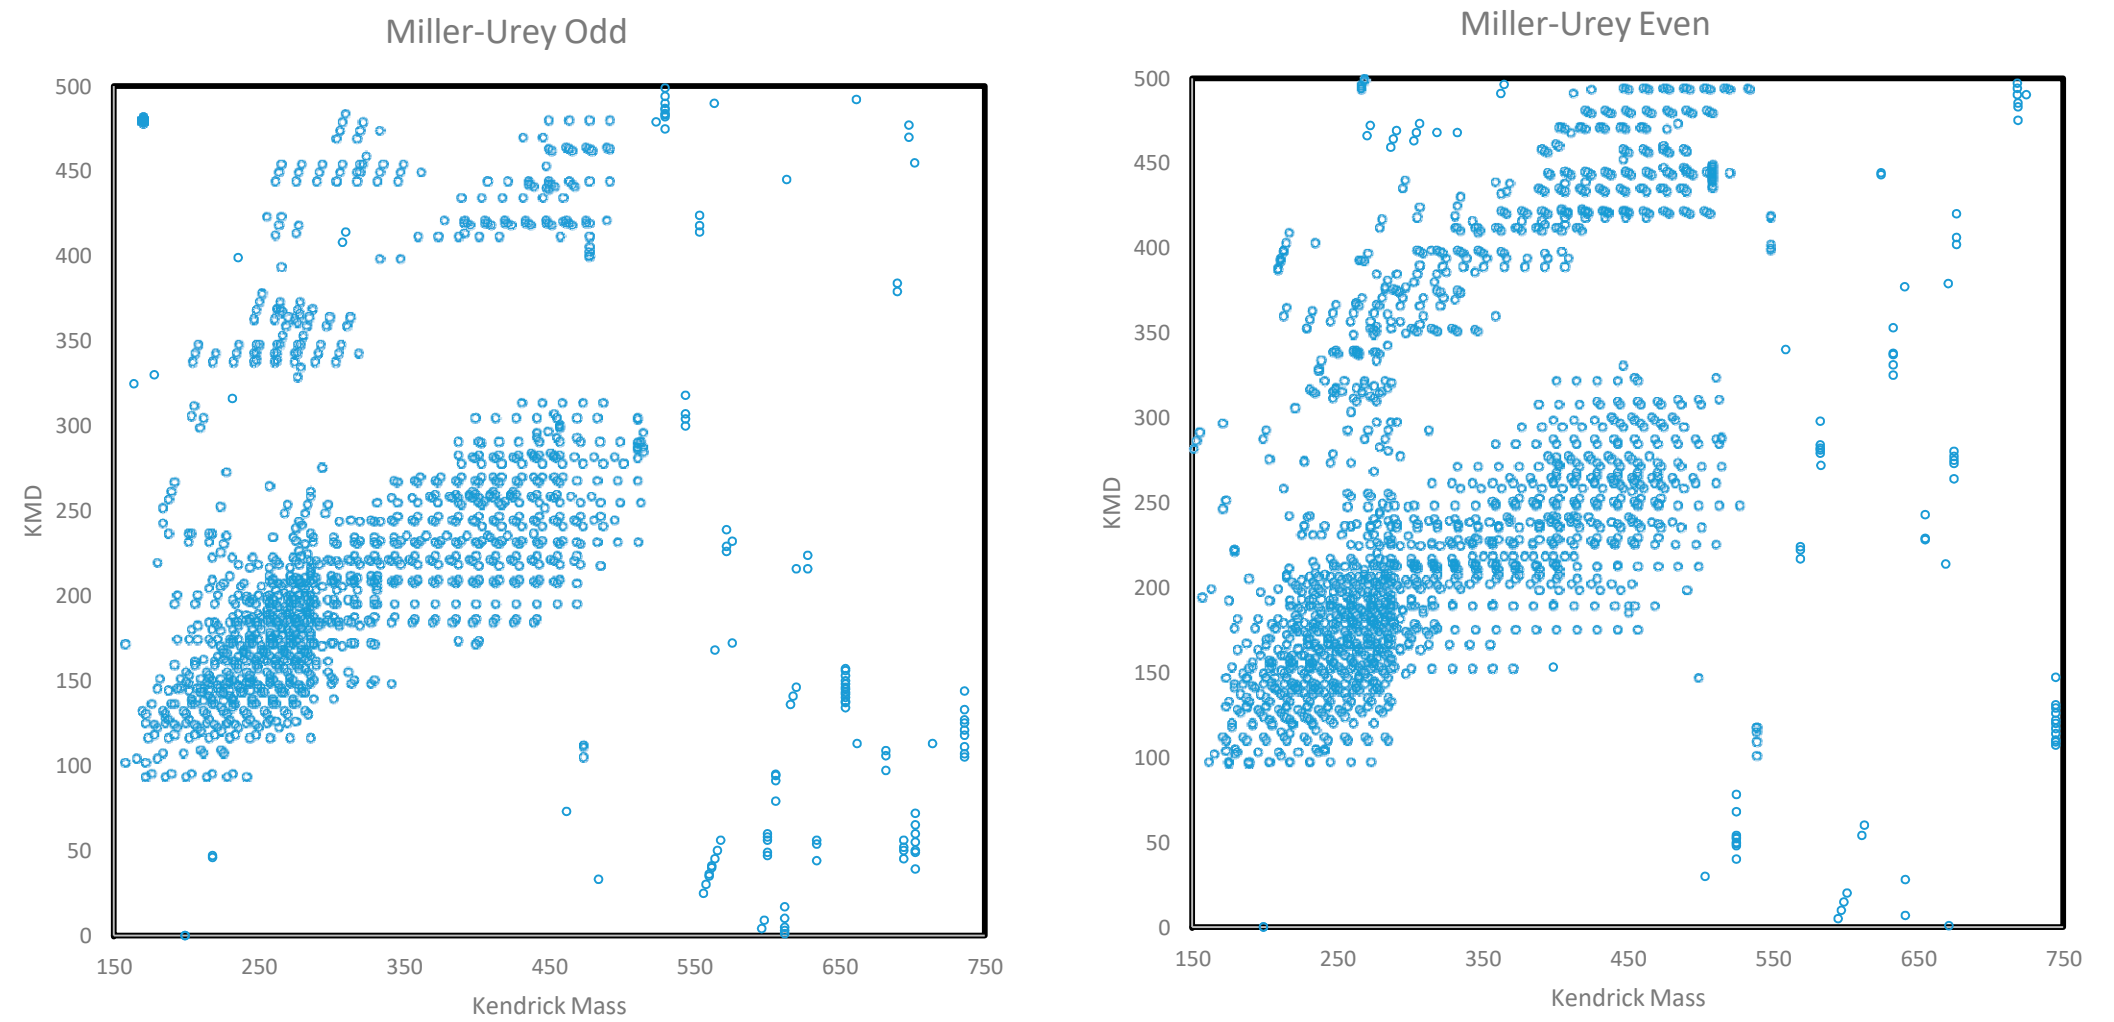

Sample 44 CH<sub>4</sub>/NH<sub>3</sub> Miller-Urey, frozen 5.13.93

**Figure S22A.** Negative mode ESI FT-ICR-MS spectrum of organics extracted from an  $\text{NH}_4\text{CN}$  polymerization prepared from 0.15 M  $\text{NH}_3$  and 0.1 M HCN and frozen at -20 C for ~45 years (see reference [49] in the main text).

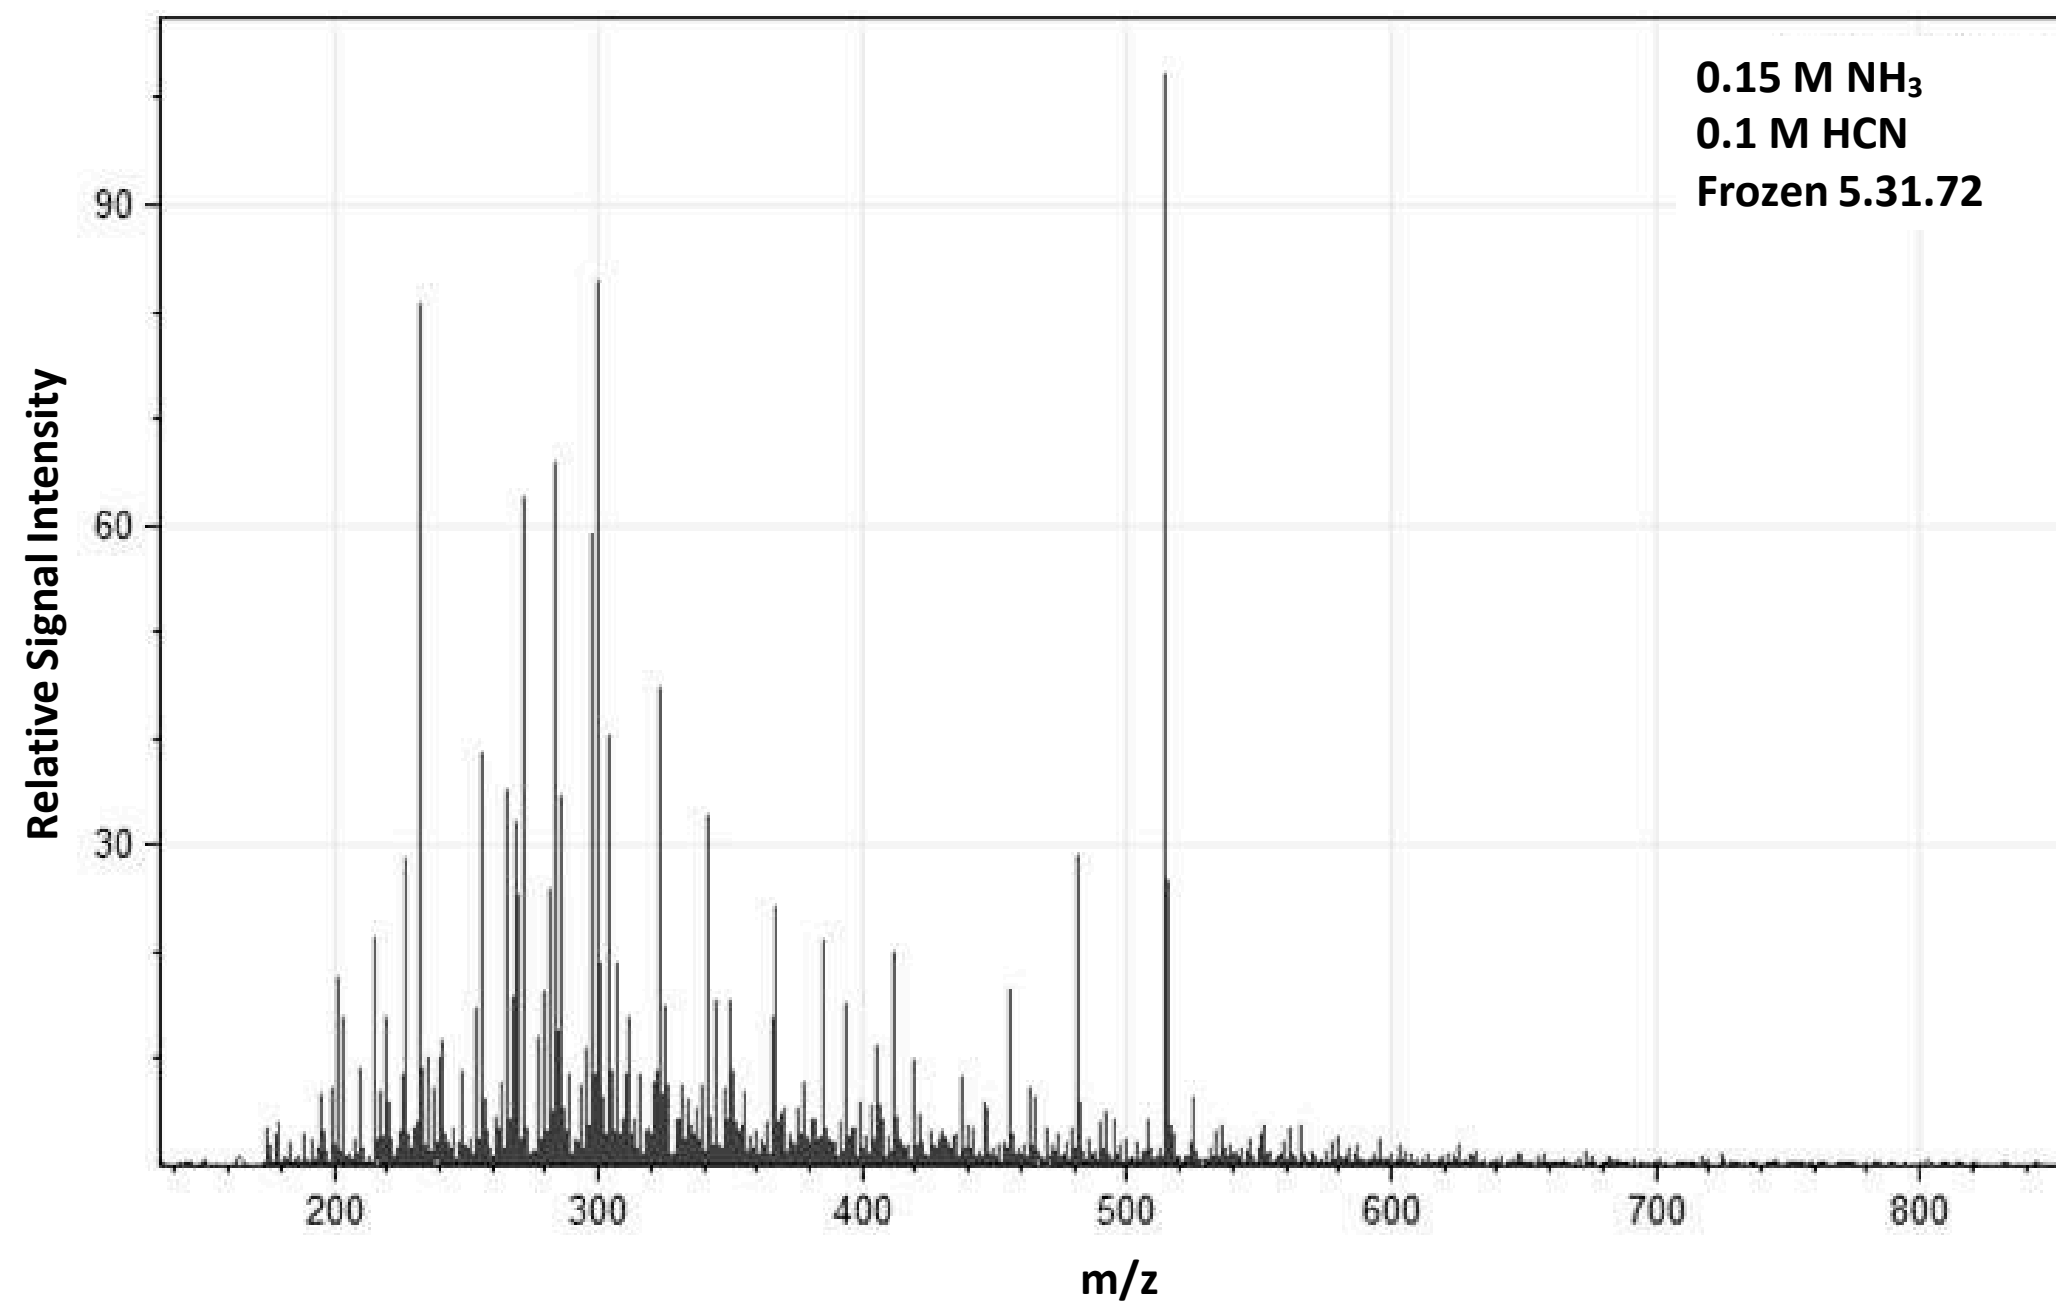

**Figure S22B.** Odd and even Kendrick Mass Defect plots of the organics extracted from an  $\text{NH}_4\text{CN}$  polymerization prepared from 0.15 M  $\text{NH}_3$  and 0.1 M HCN and frozen at -20 C for  $\sim 45$  years (see reference [49] in the main text).

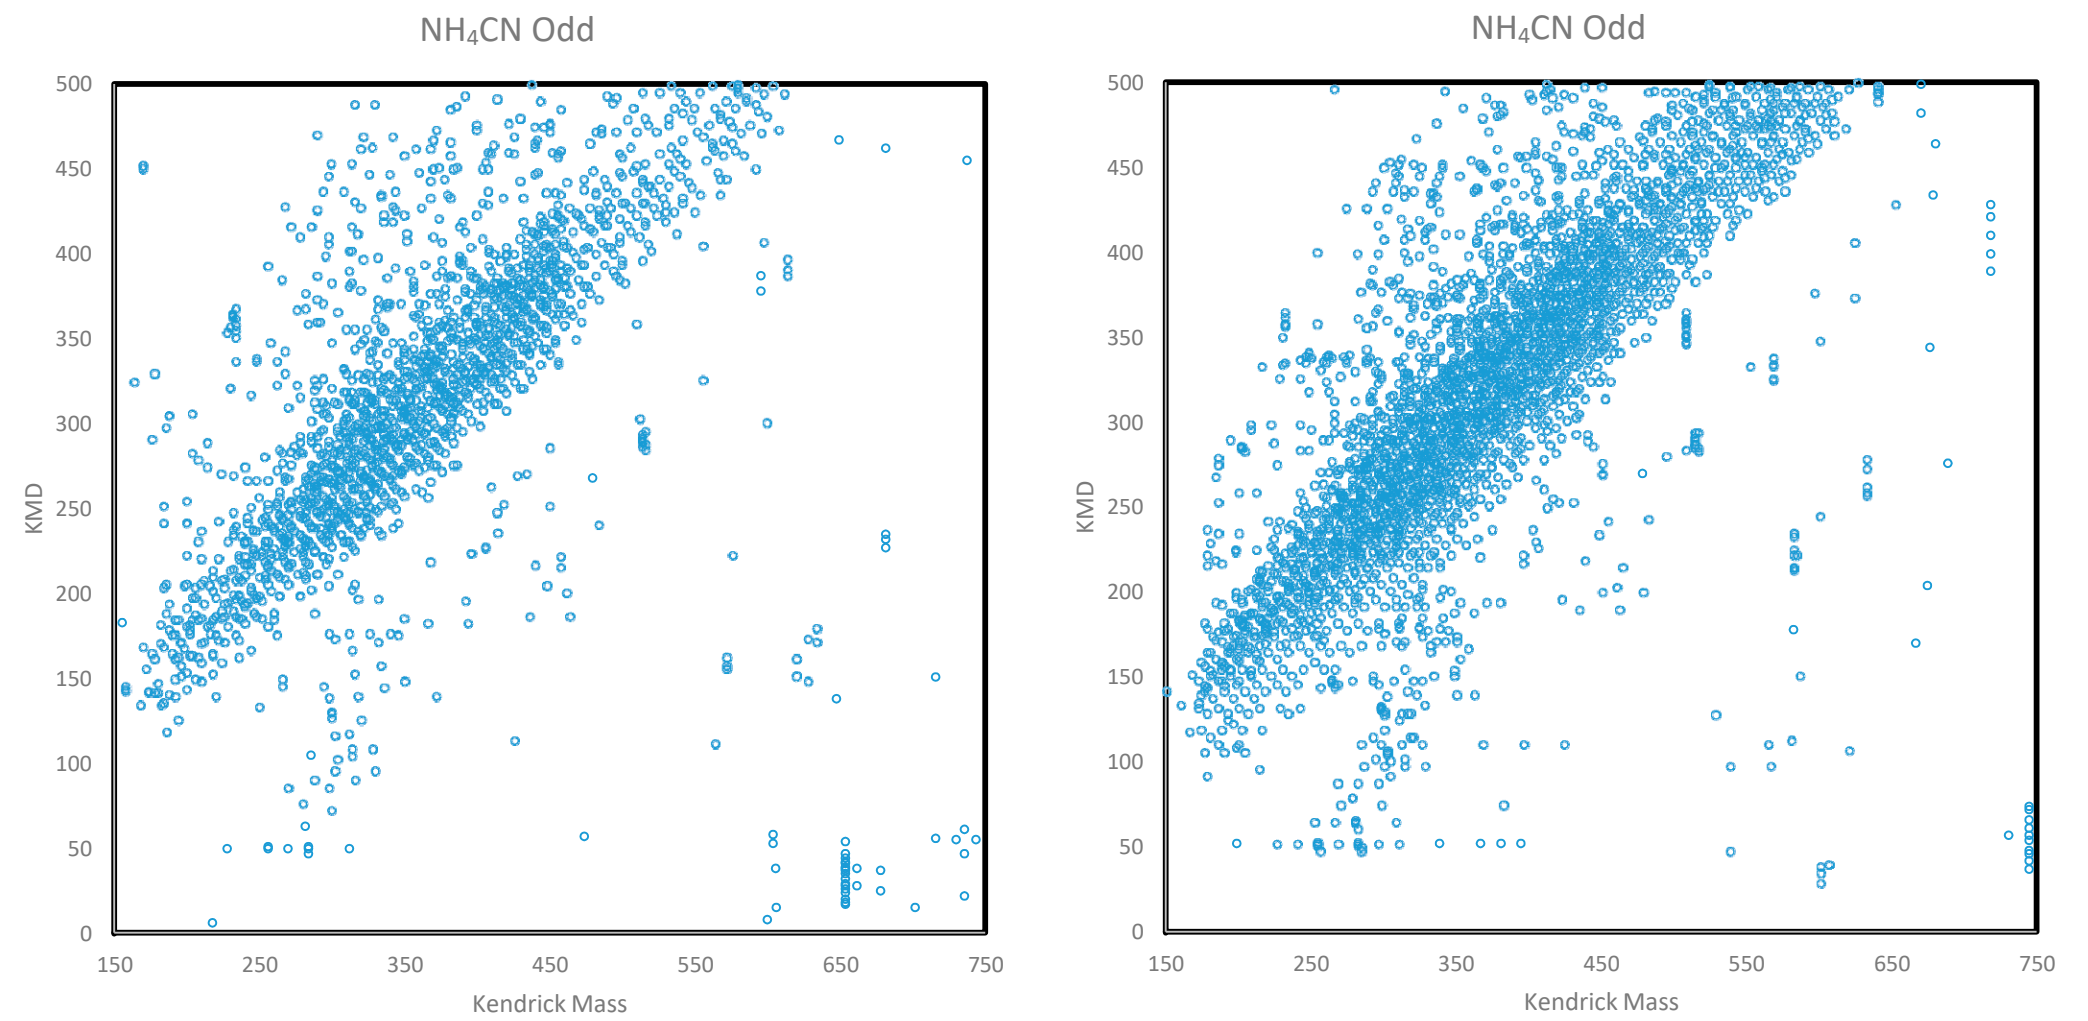

Sample 45 NH<sub>4</sub>CN (frozen 5.31.72)

**Figure S23A.** Negative mode ESI FT-ICR-MS spectrum of organics extracted from neat pyruvic acid heated at 150° C for 47 hours.

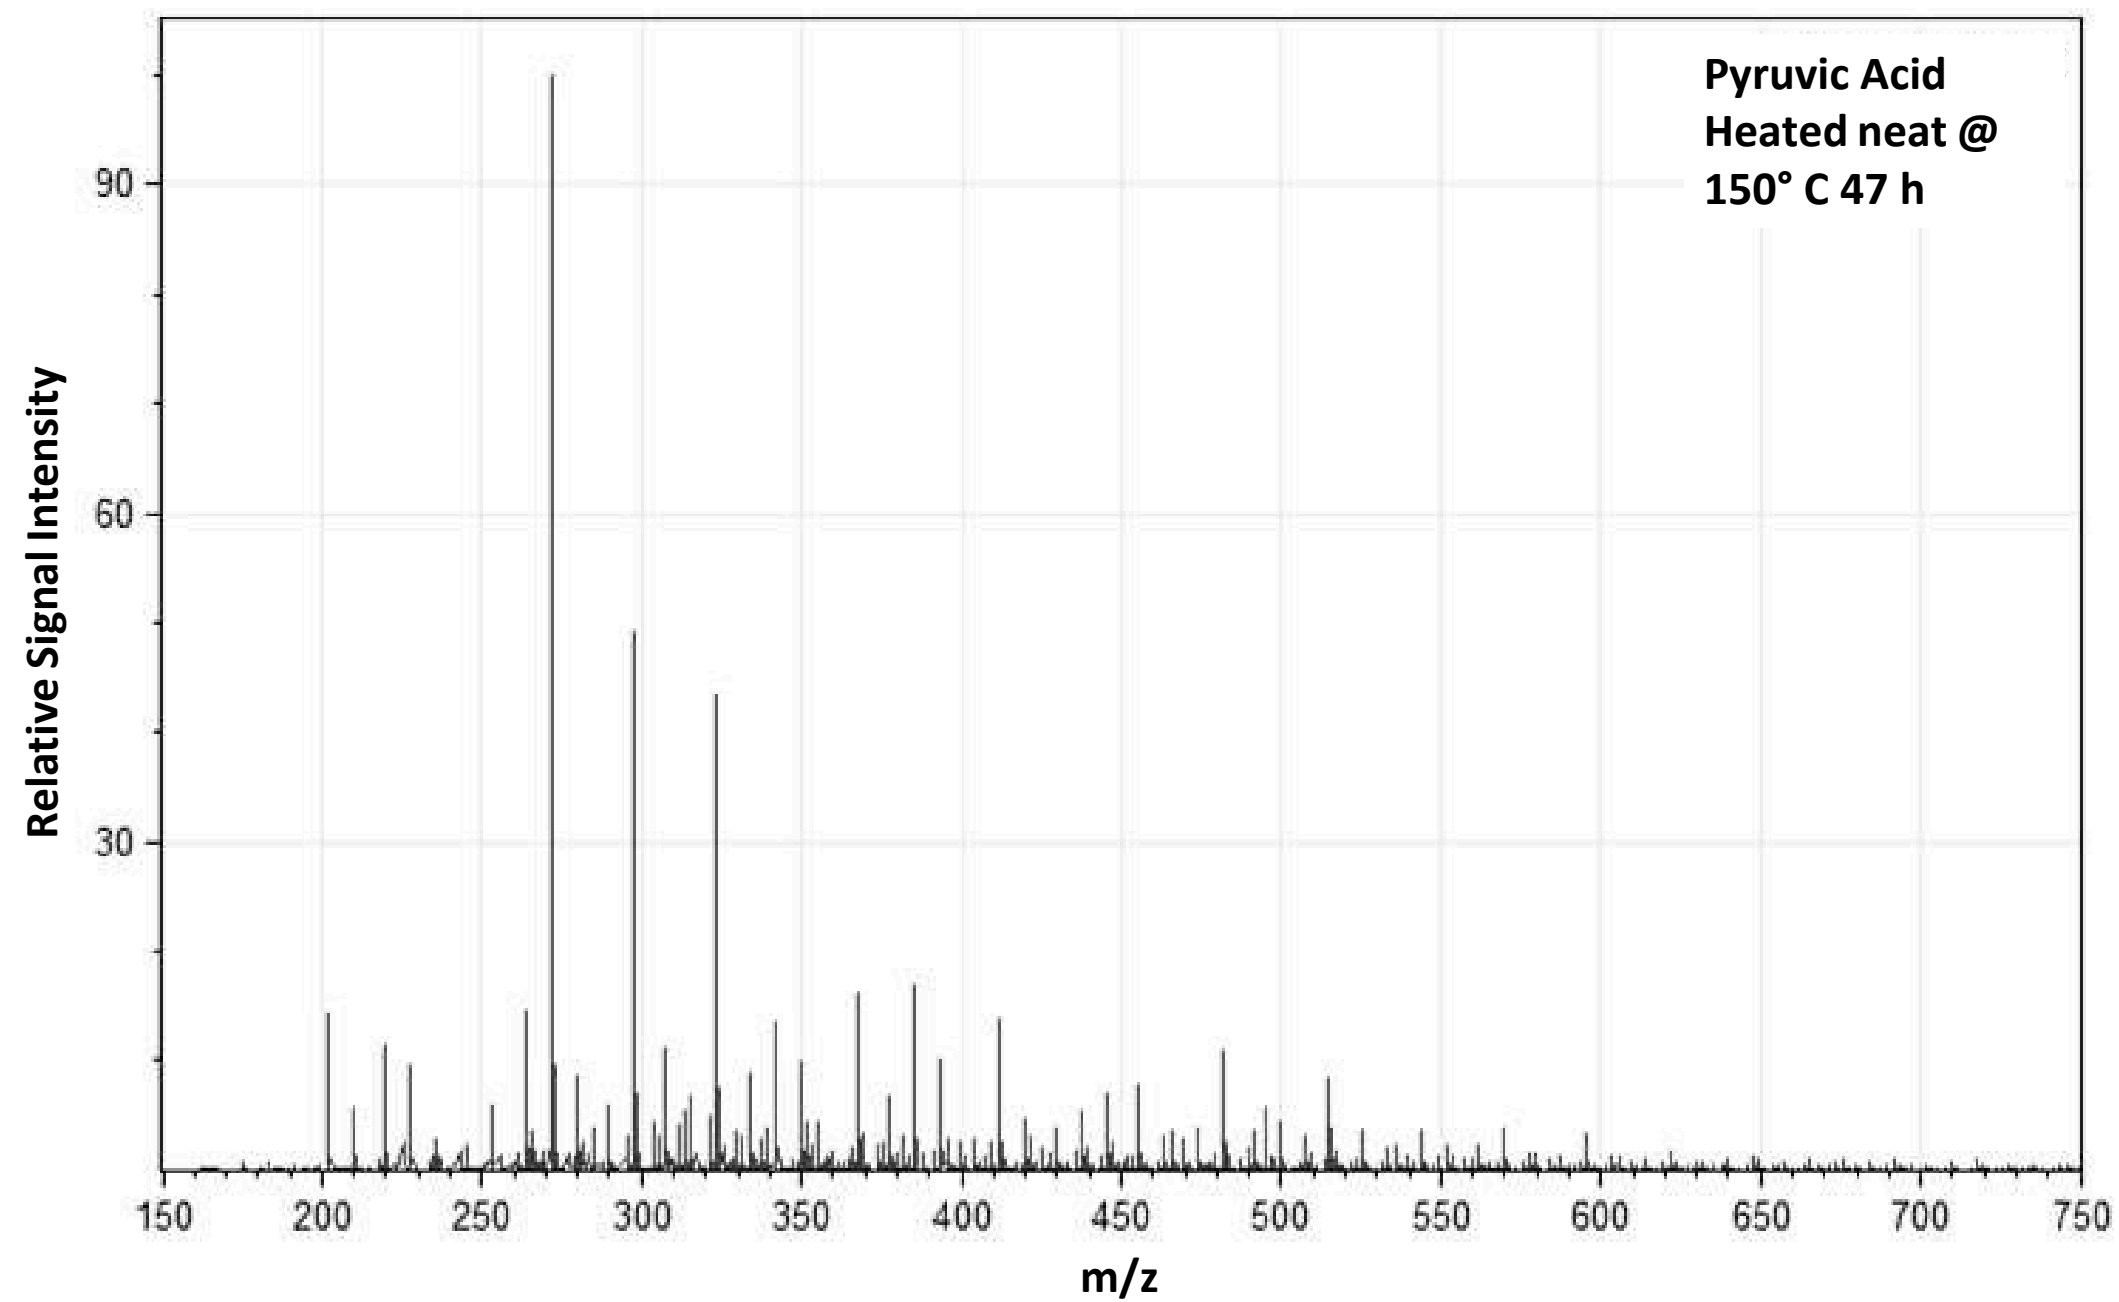

**Figure S23B.** Odd and even Kendrick Mass Defect plots of the organics extracted from neat pyruvic acid heated at 150° C for 47 hours.

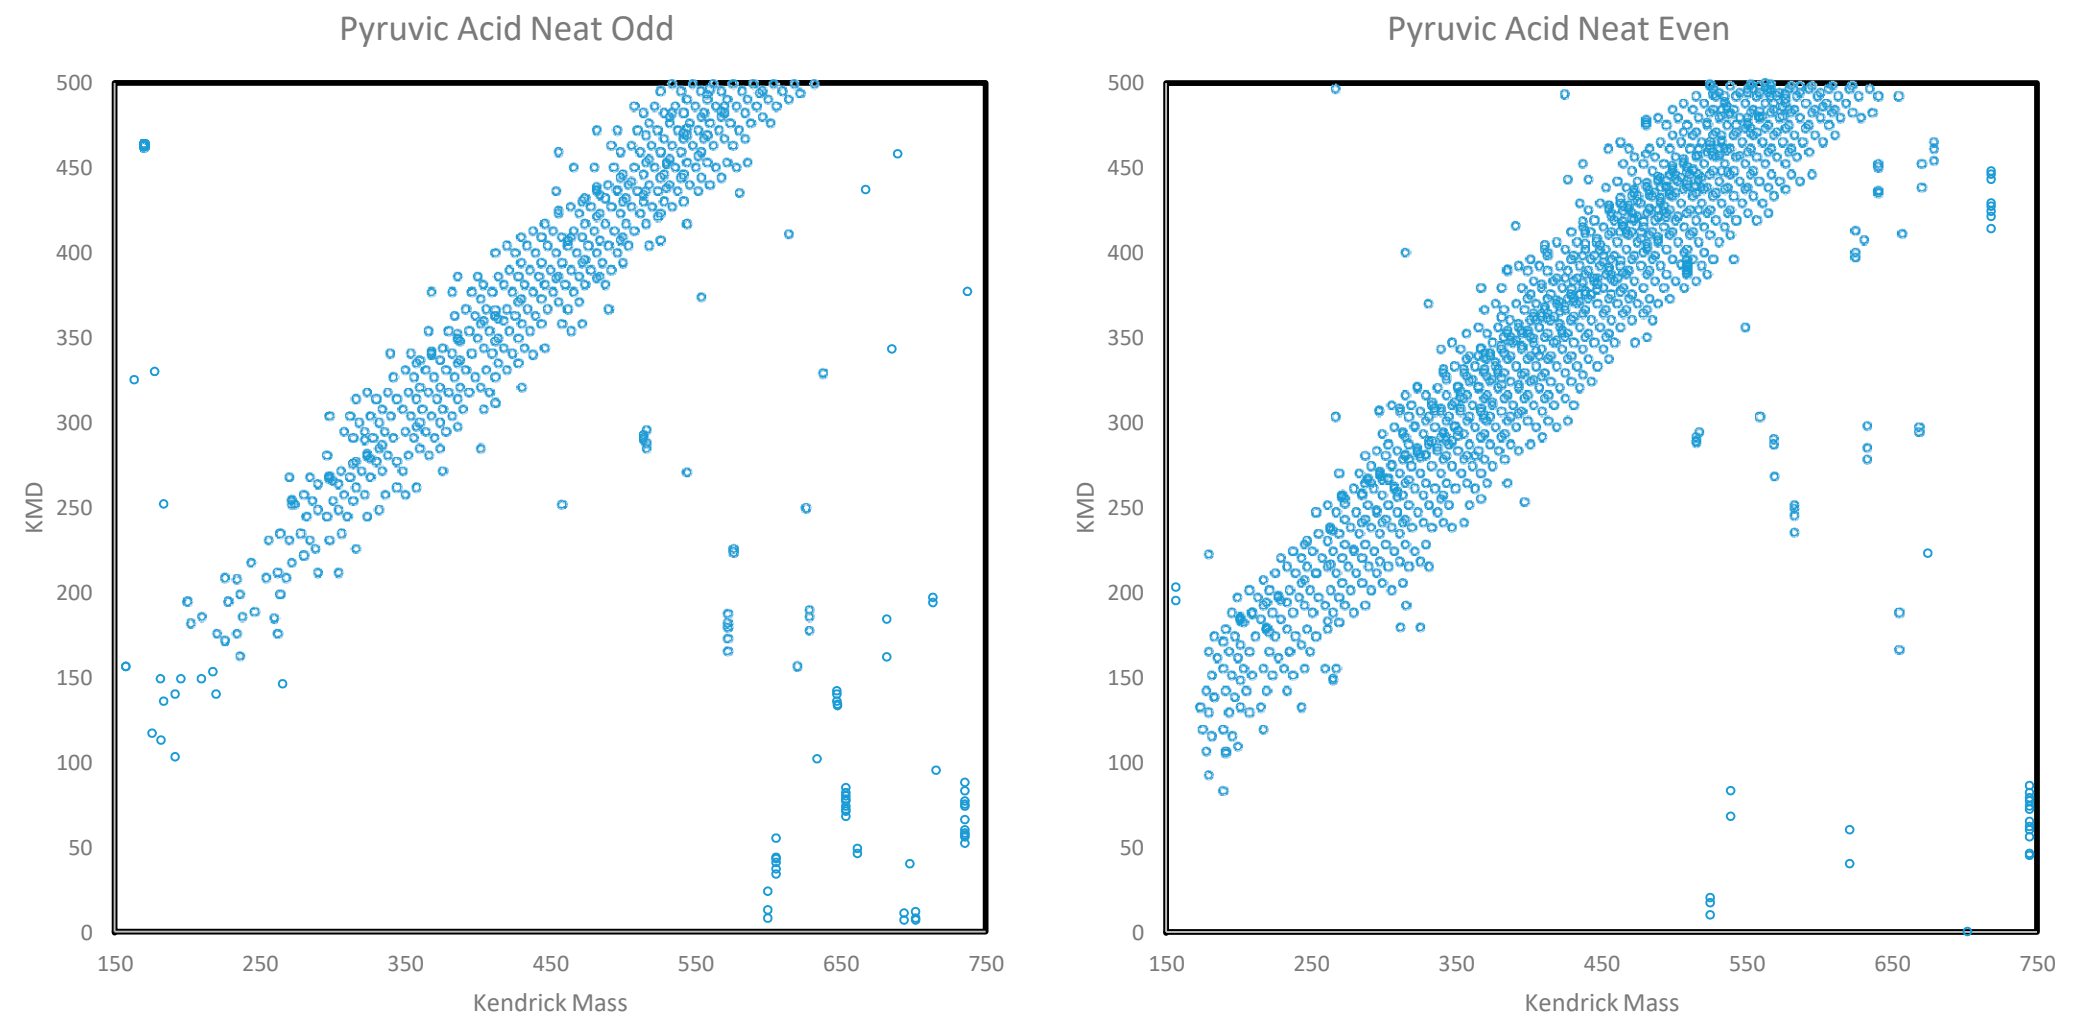

Sample 46 Neat Pyruvic Acid 150°

**Figure S24A.** Negative mode ESI FT-ICR-MS spectrum of organics extracted from 5.7 M aqueous pyruvic acid heated at 150° C for 47 hours.

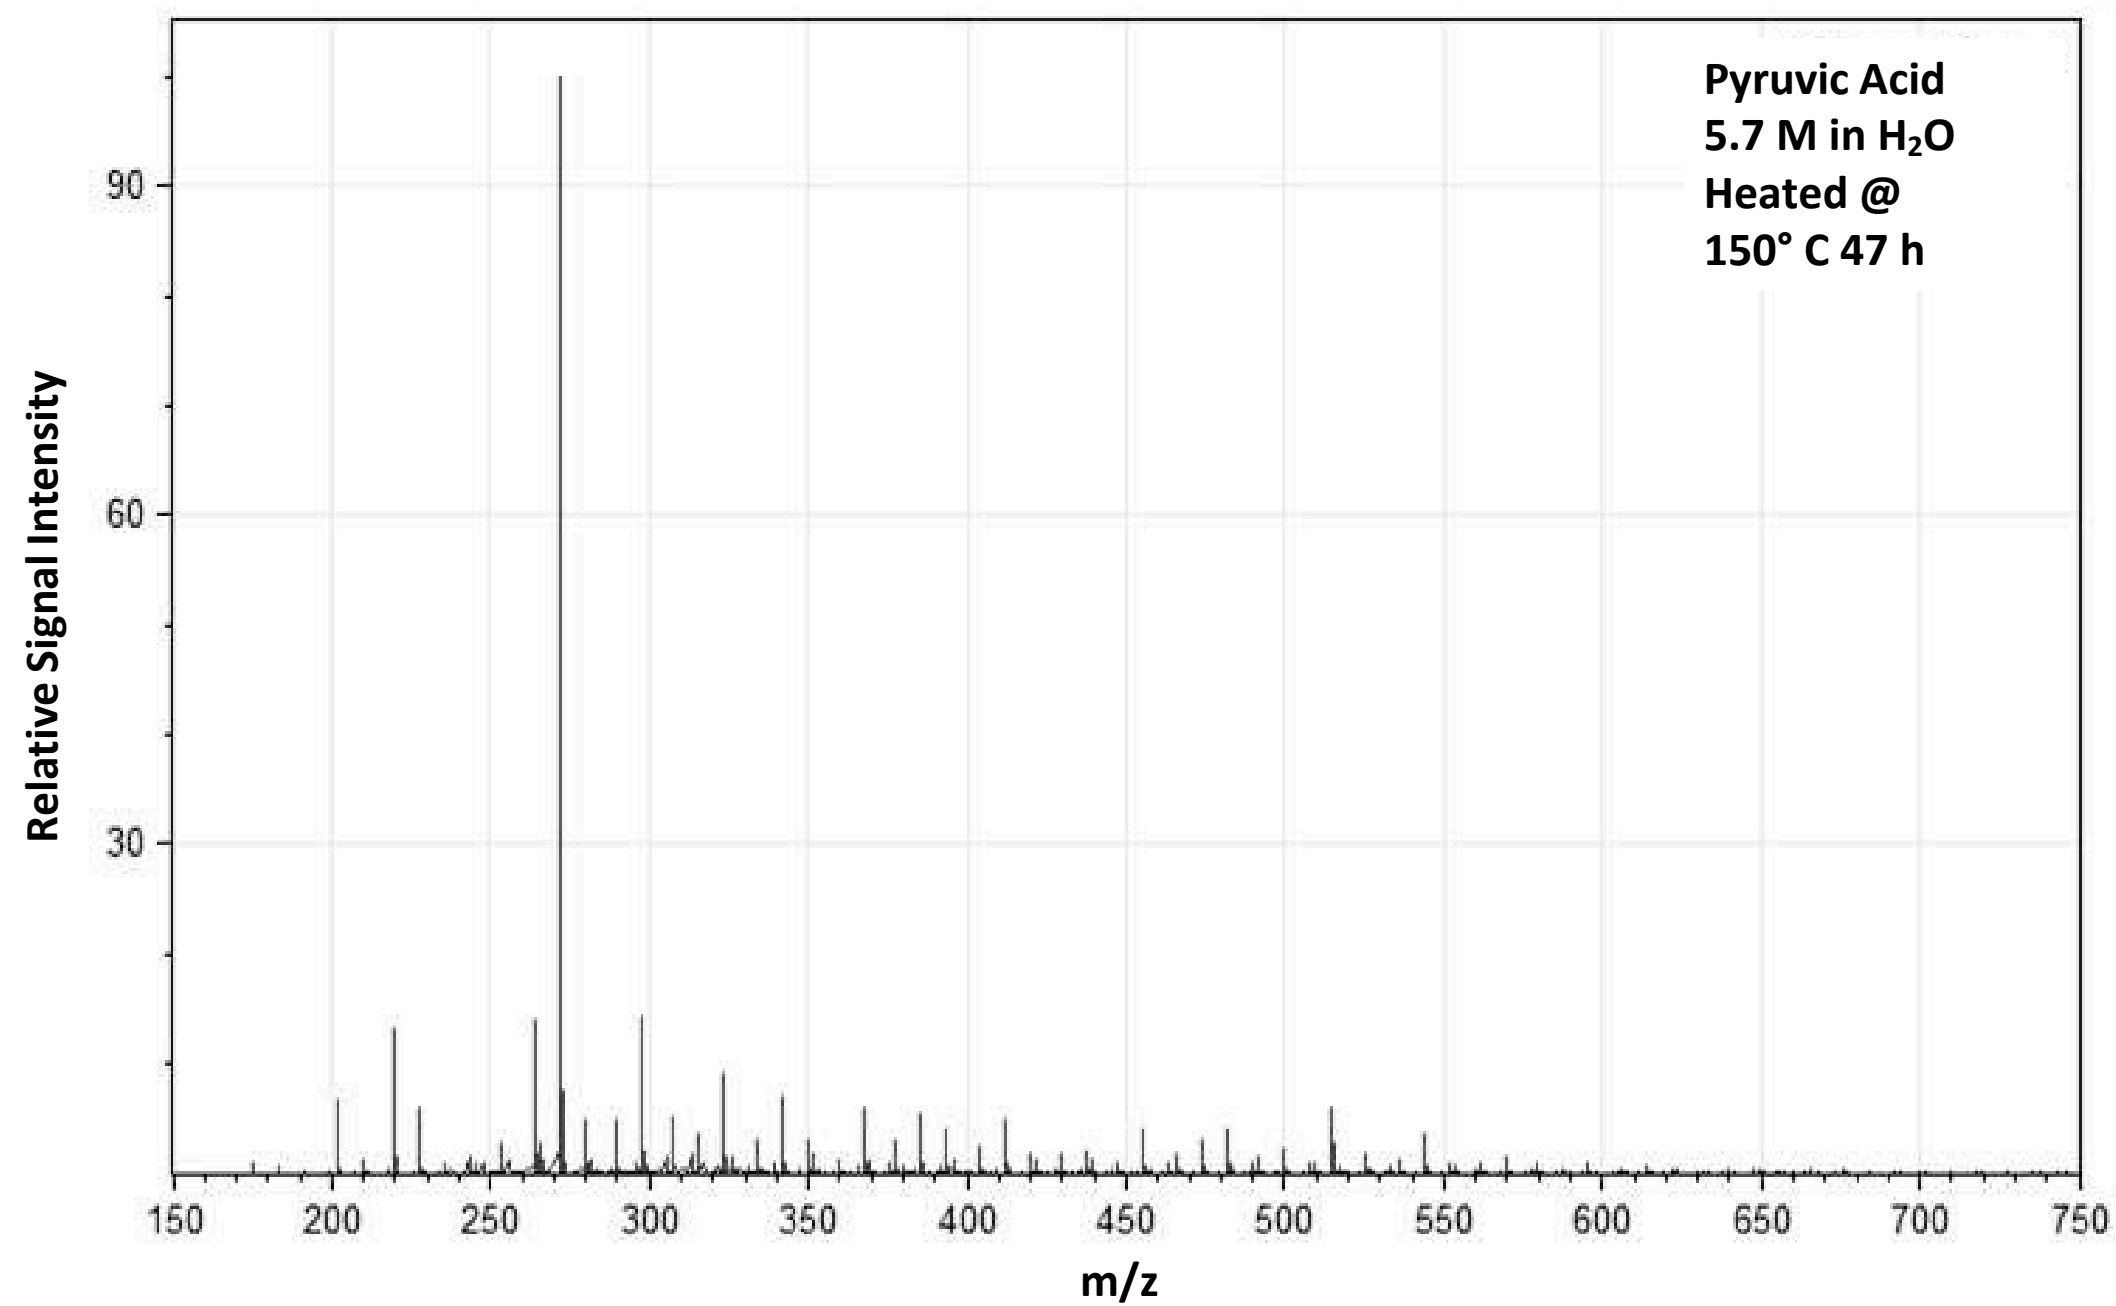



**Figure S24B.** Odd and even Kendrick Mass Defect plots of the organics extracted from 5.7 M aqueous pyruvic acid heated at 150° C for 47 hours.

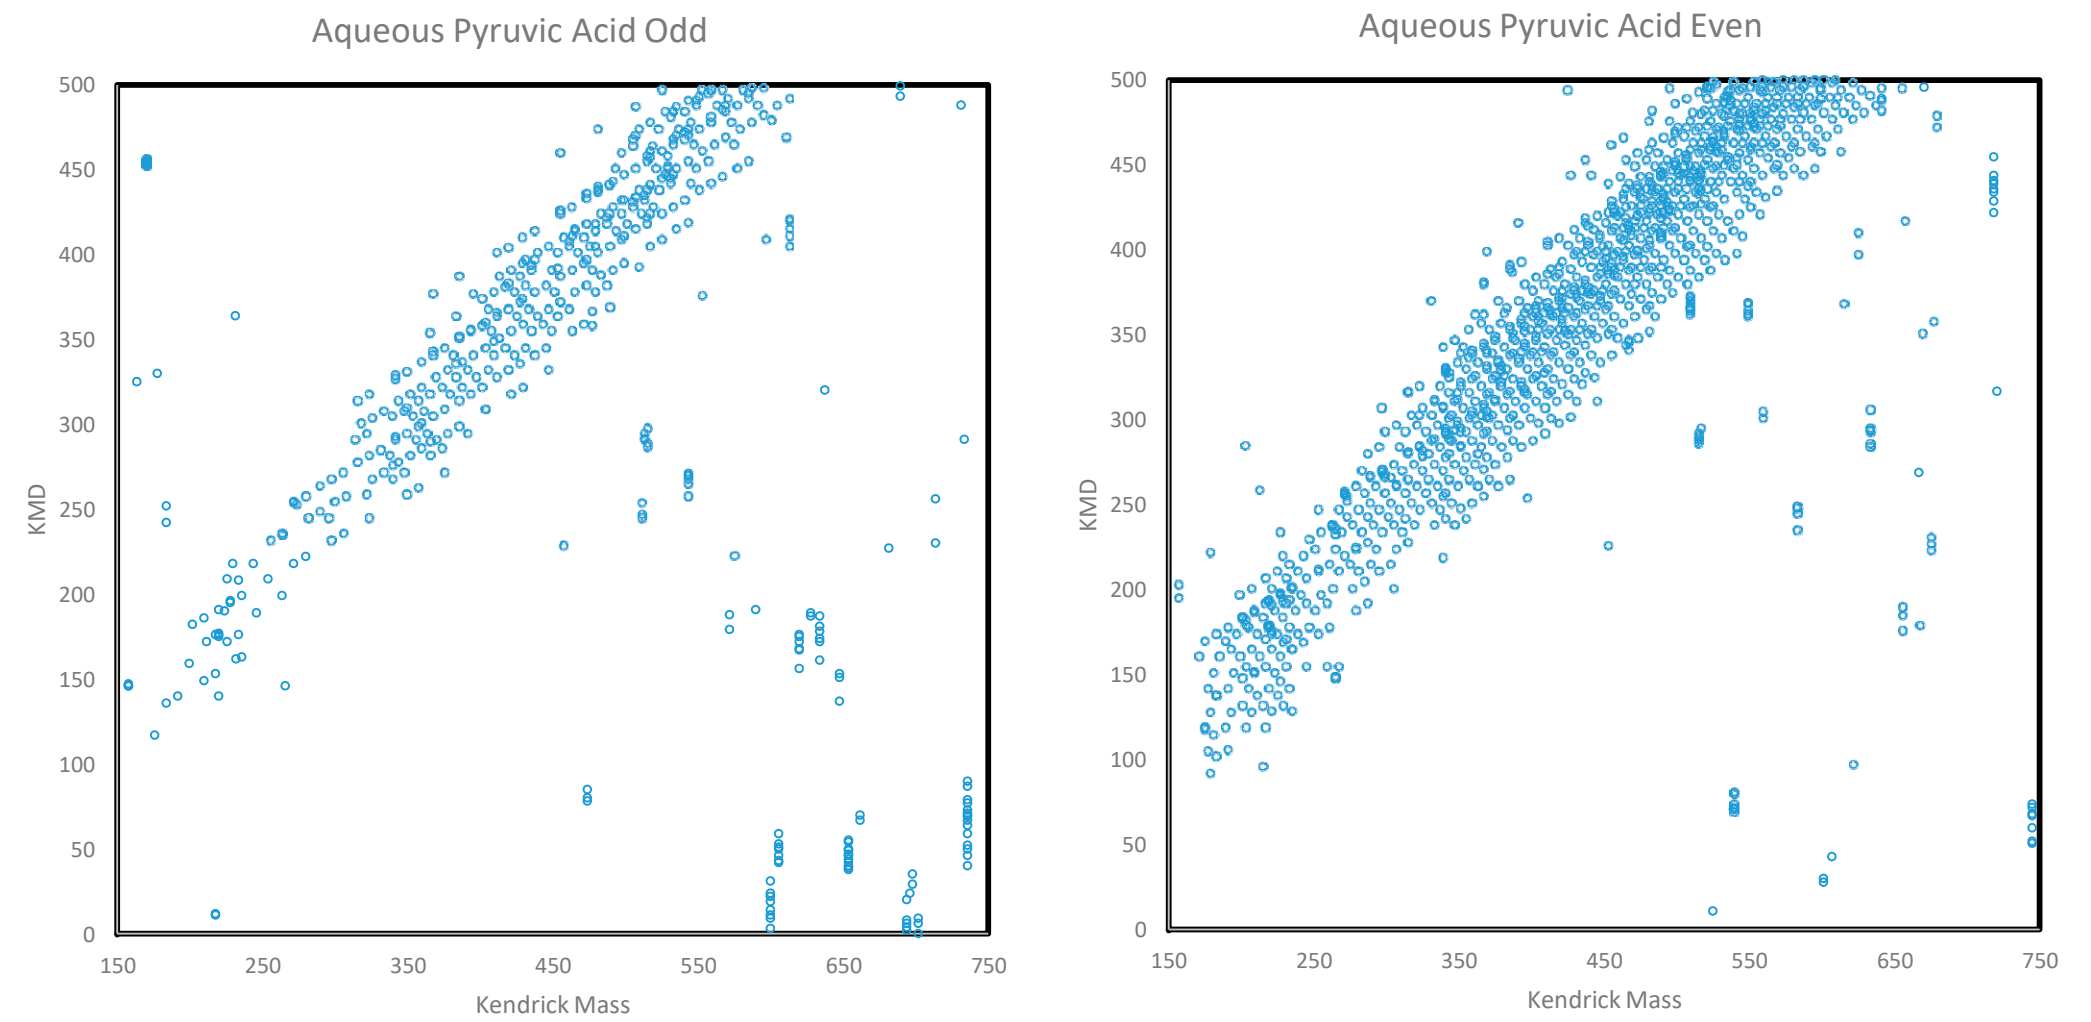

Sample 47 Aqueous pyruvic acid 150° C

**Figure S25A.** Negative mode ESI FT-ICR-MS spectrum of organics extracted using methanol/water of a sample of the Murchison meteorite.

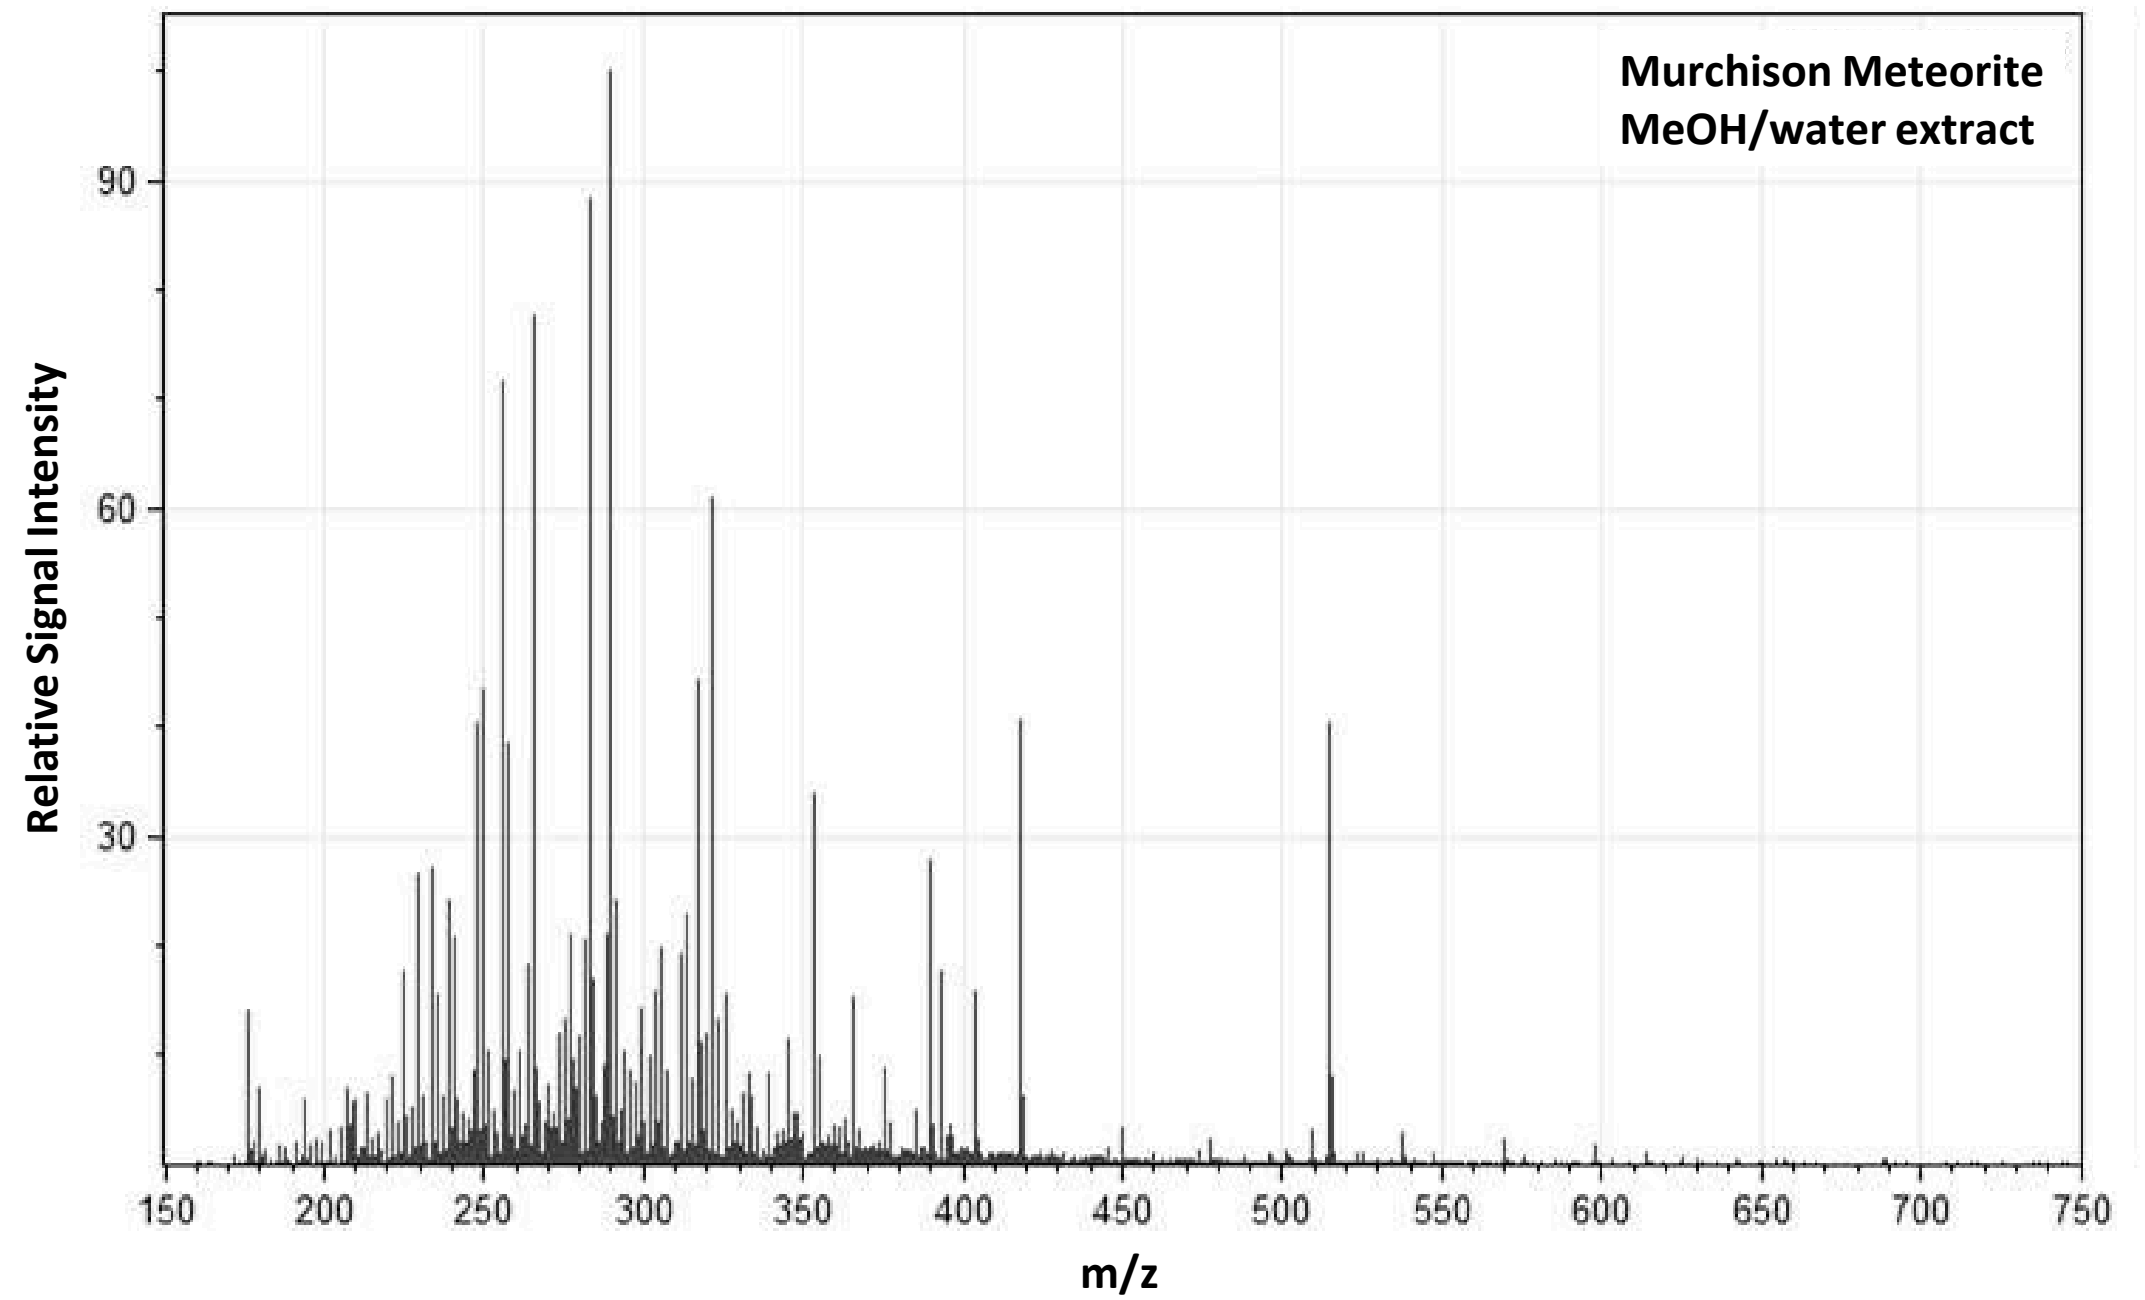

**Figure S25B.** Odd and even Kendrick Mass Defect plots of the organics extracted using methanol/water of a sample of the Murchison meteorite.

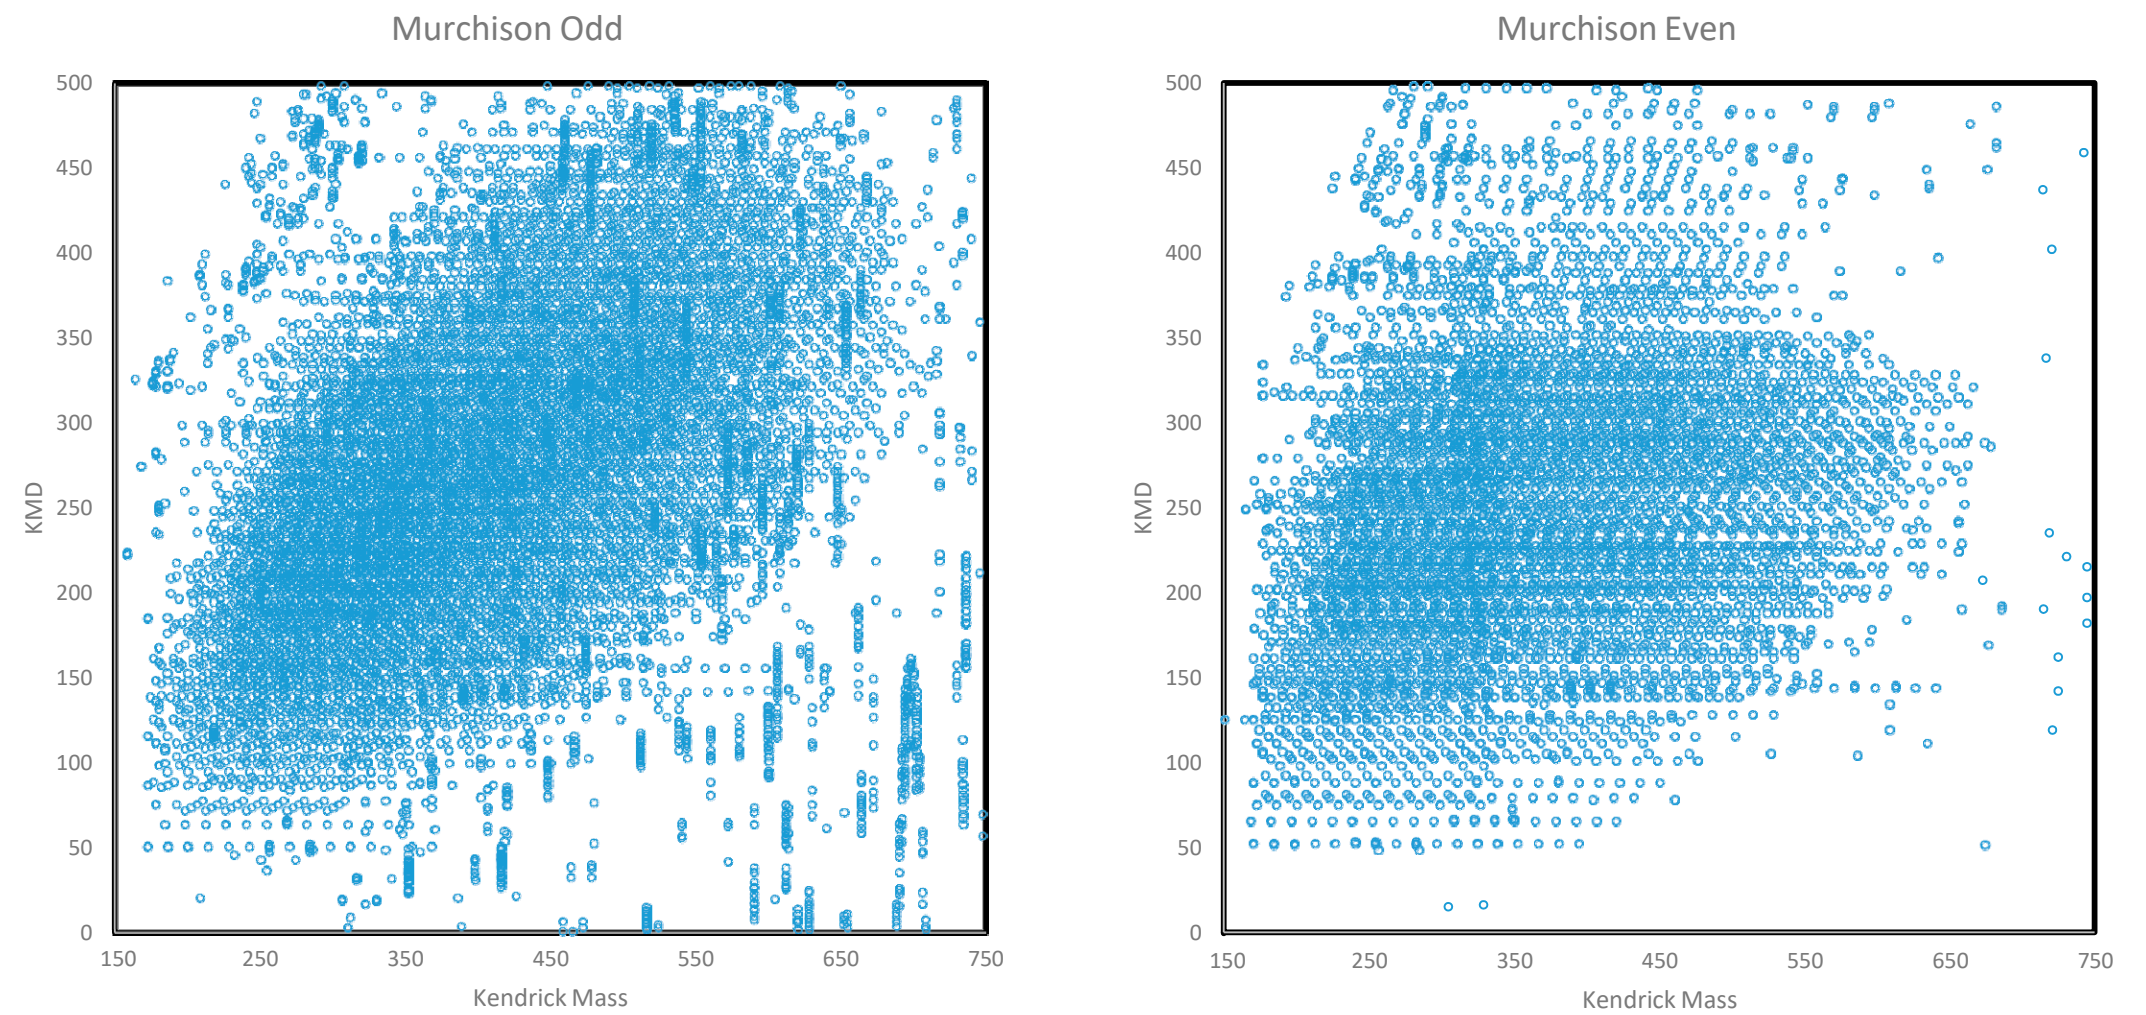

Sample 48 Murchison Meteorite

**Figure S26A.** Negative mode ESI FT-ICR-MS spectrum of organics extracted using methanol/water of a sample of the Allende meteorite.

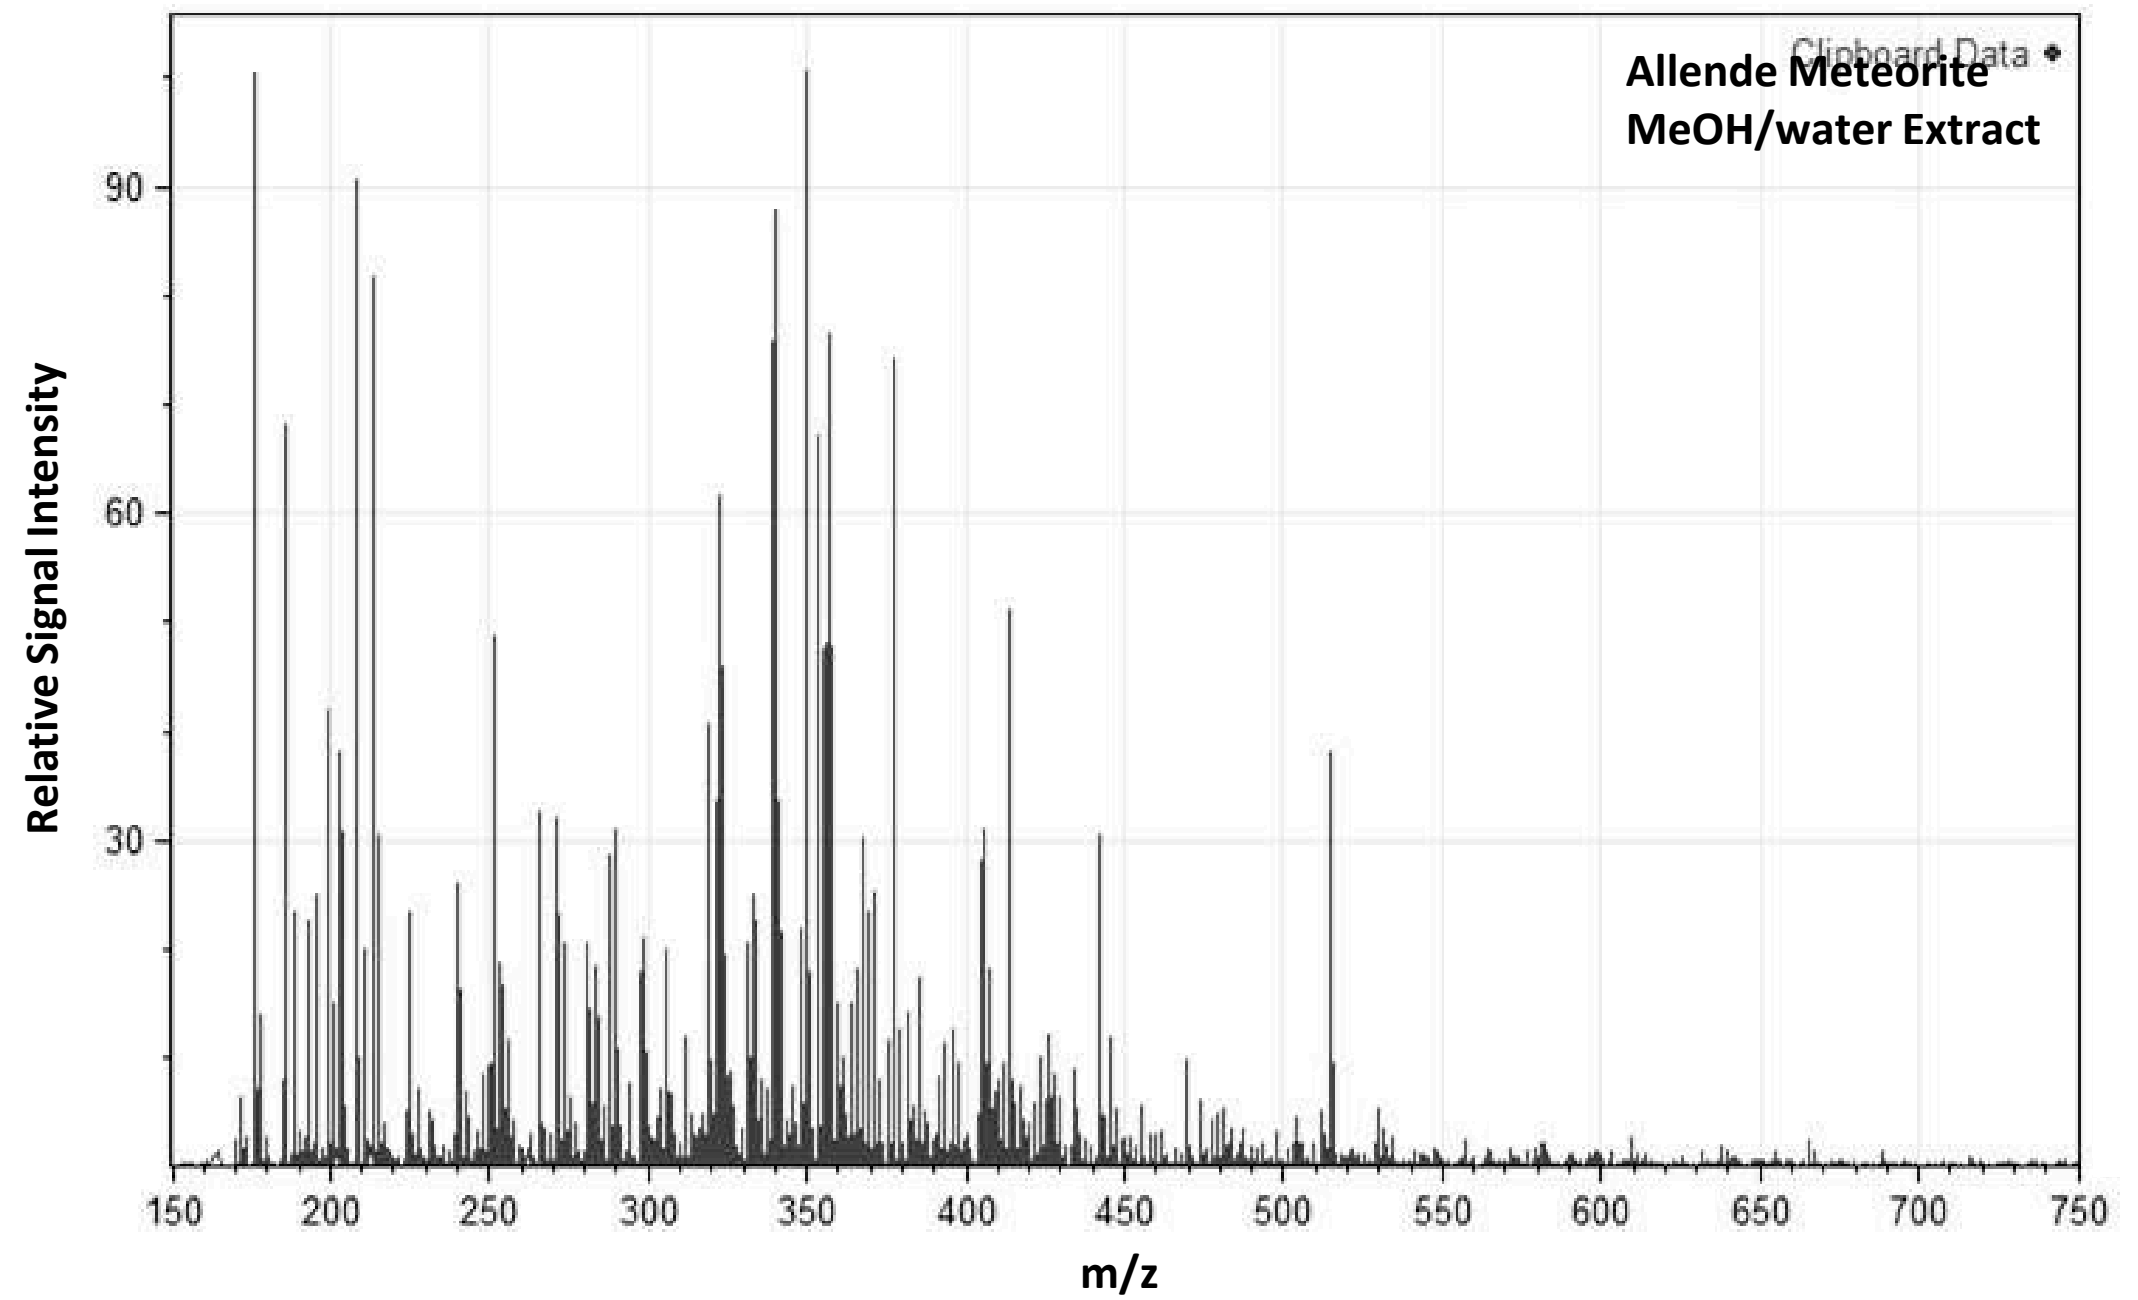

**Figure S26B.** Odd and even Kendrick Mass Defect plots of the organics extracted using methanol/water of a sample of the Allende meteorite.

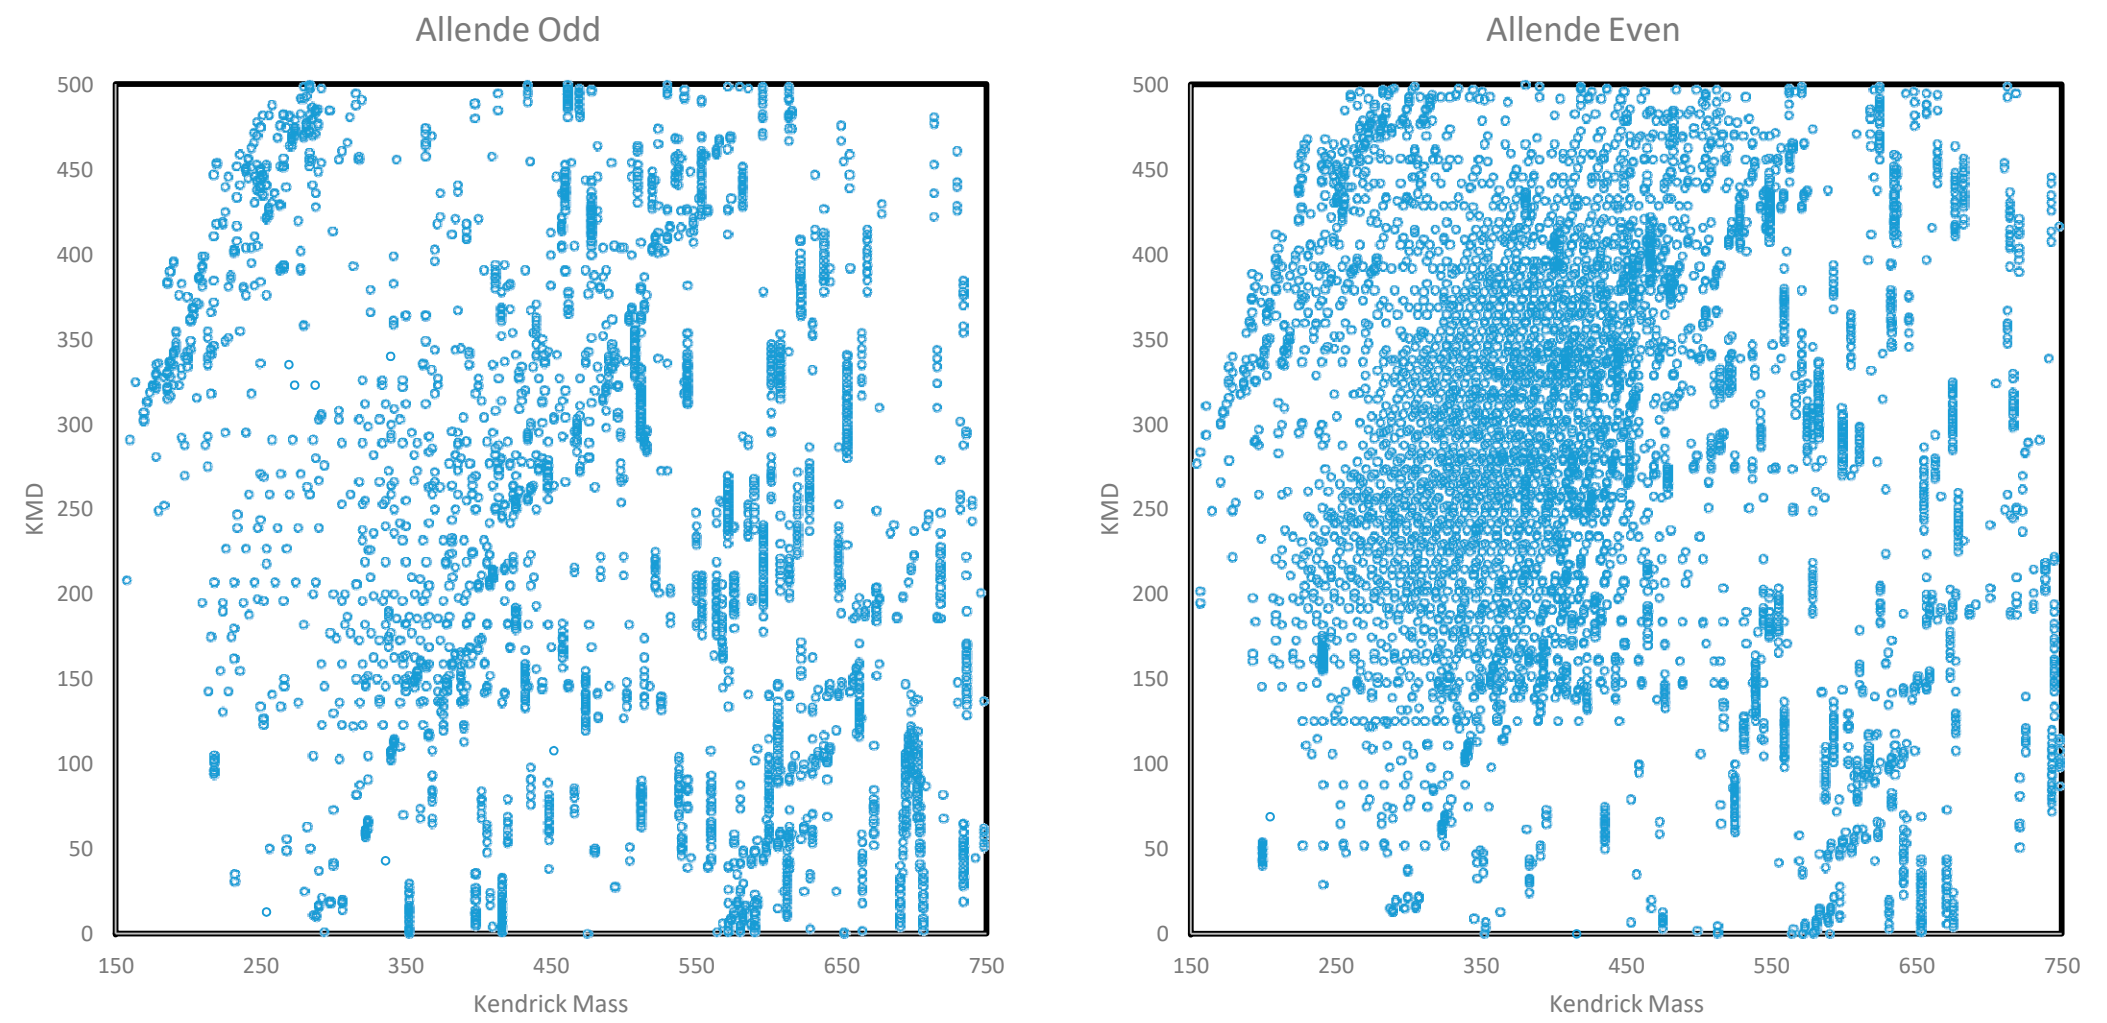

Sample 49 Allende Meteorite

**Figure S27A.** Negative mode ESI FT-ICR-MS spectrum of organics extracted from the reaction of 2 M paraformaldehyde, 1 M glycolaldehyde, and 0.05 M Ca(OH)<sub>2</sub> heated at 85° C for eight days.

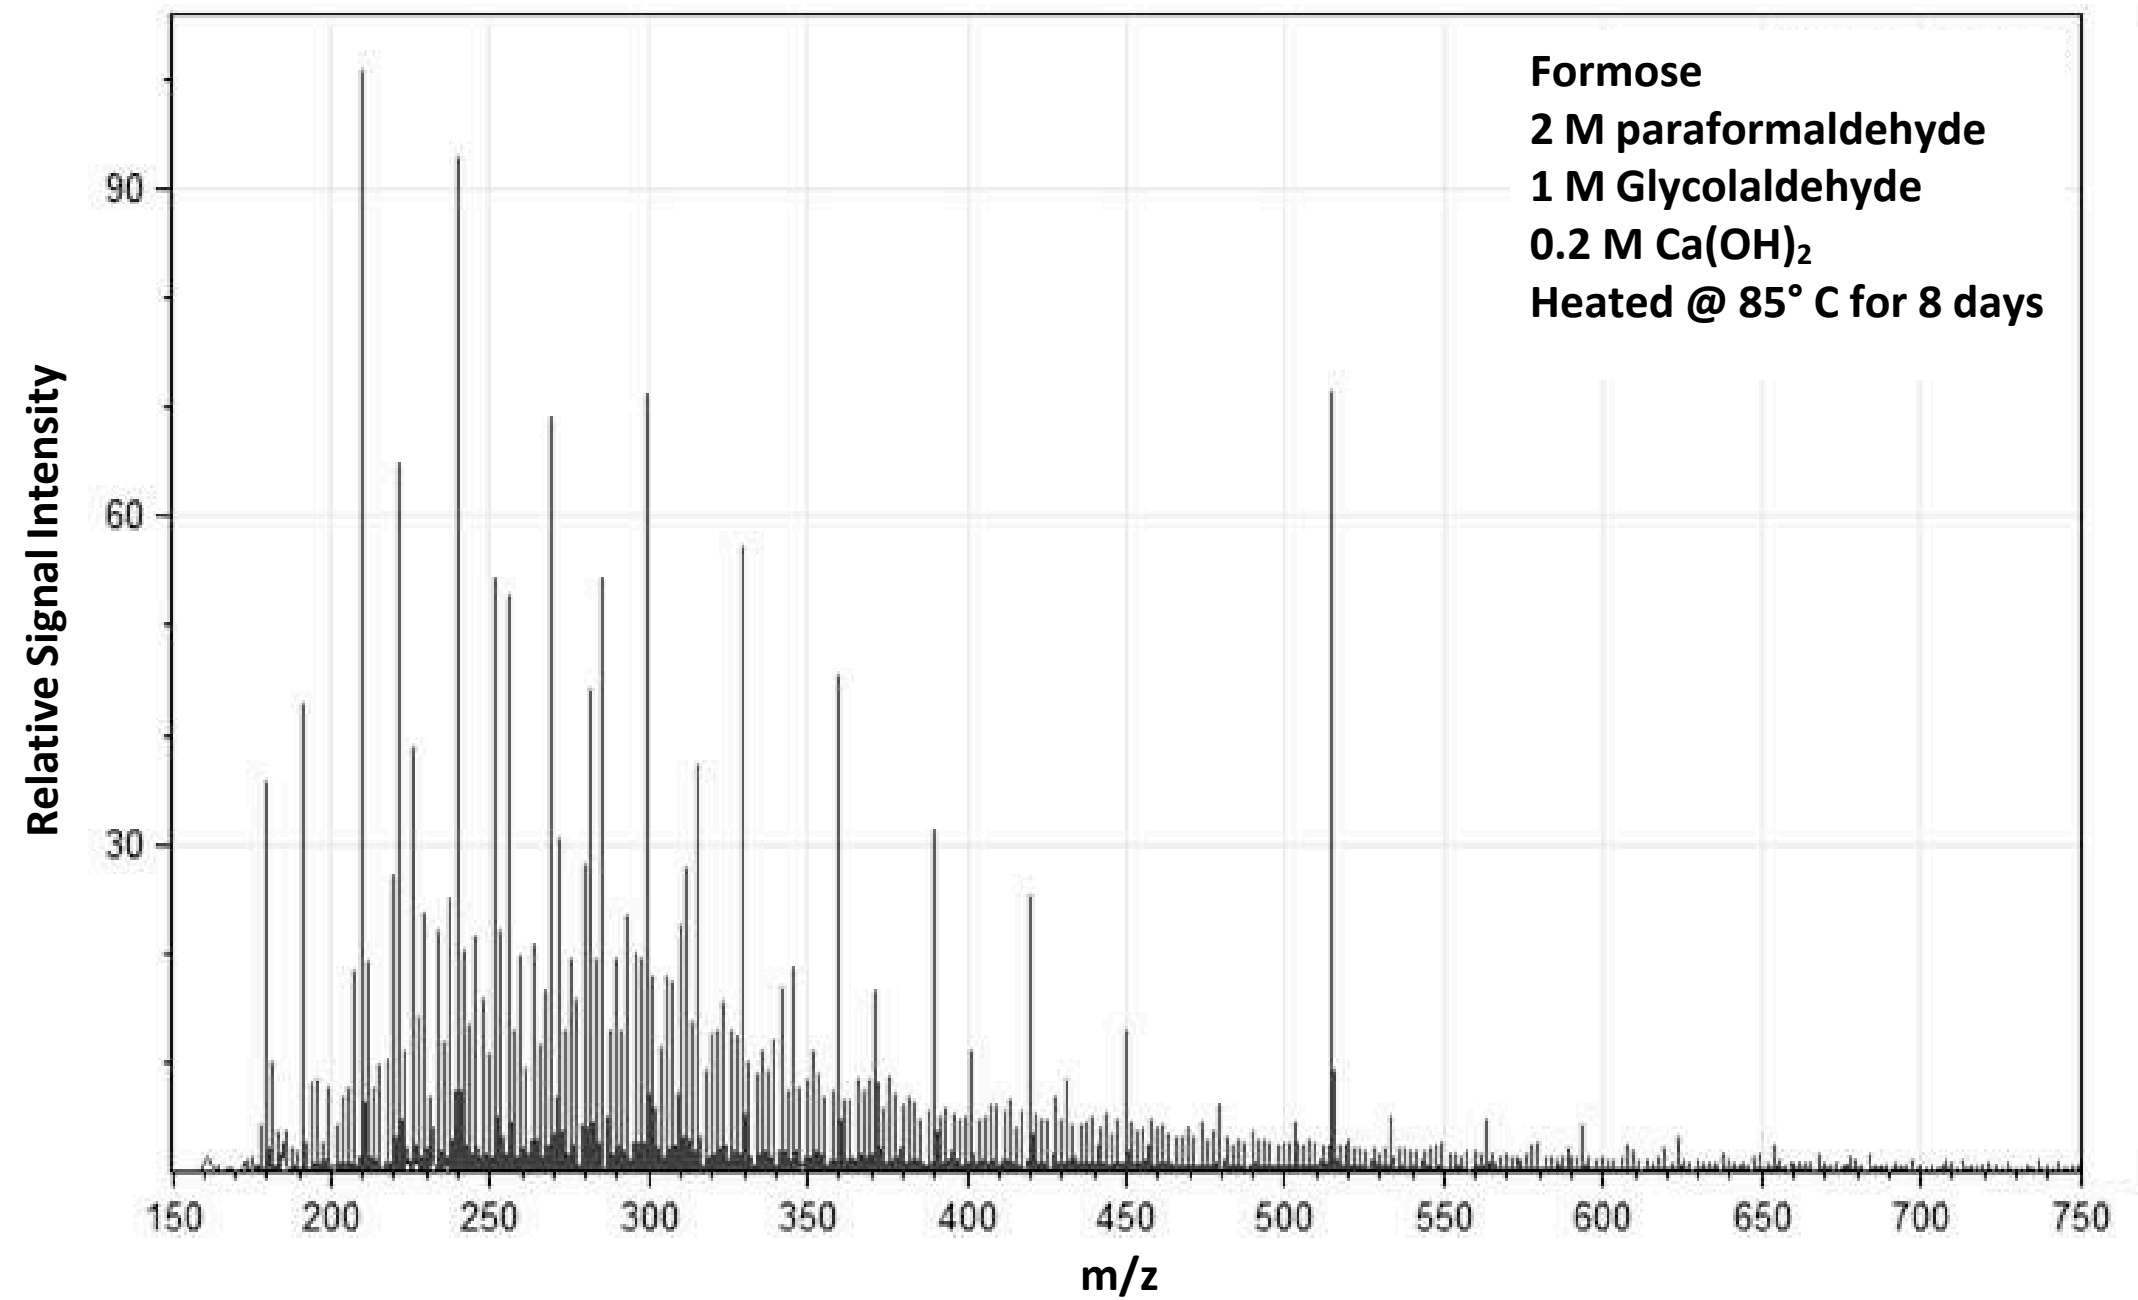

**Figure S27B.** Odd and even Kendrick Mass Defect plots of the organics extracted from the reaction of 2 M paraformaldehyde, 1 M glycolaldehyde, and 0.05 M Ca(OH)<sub>2</sub> heated at 85° C for eight days.

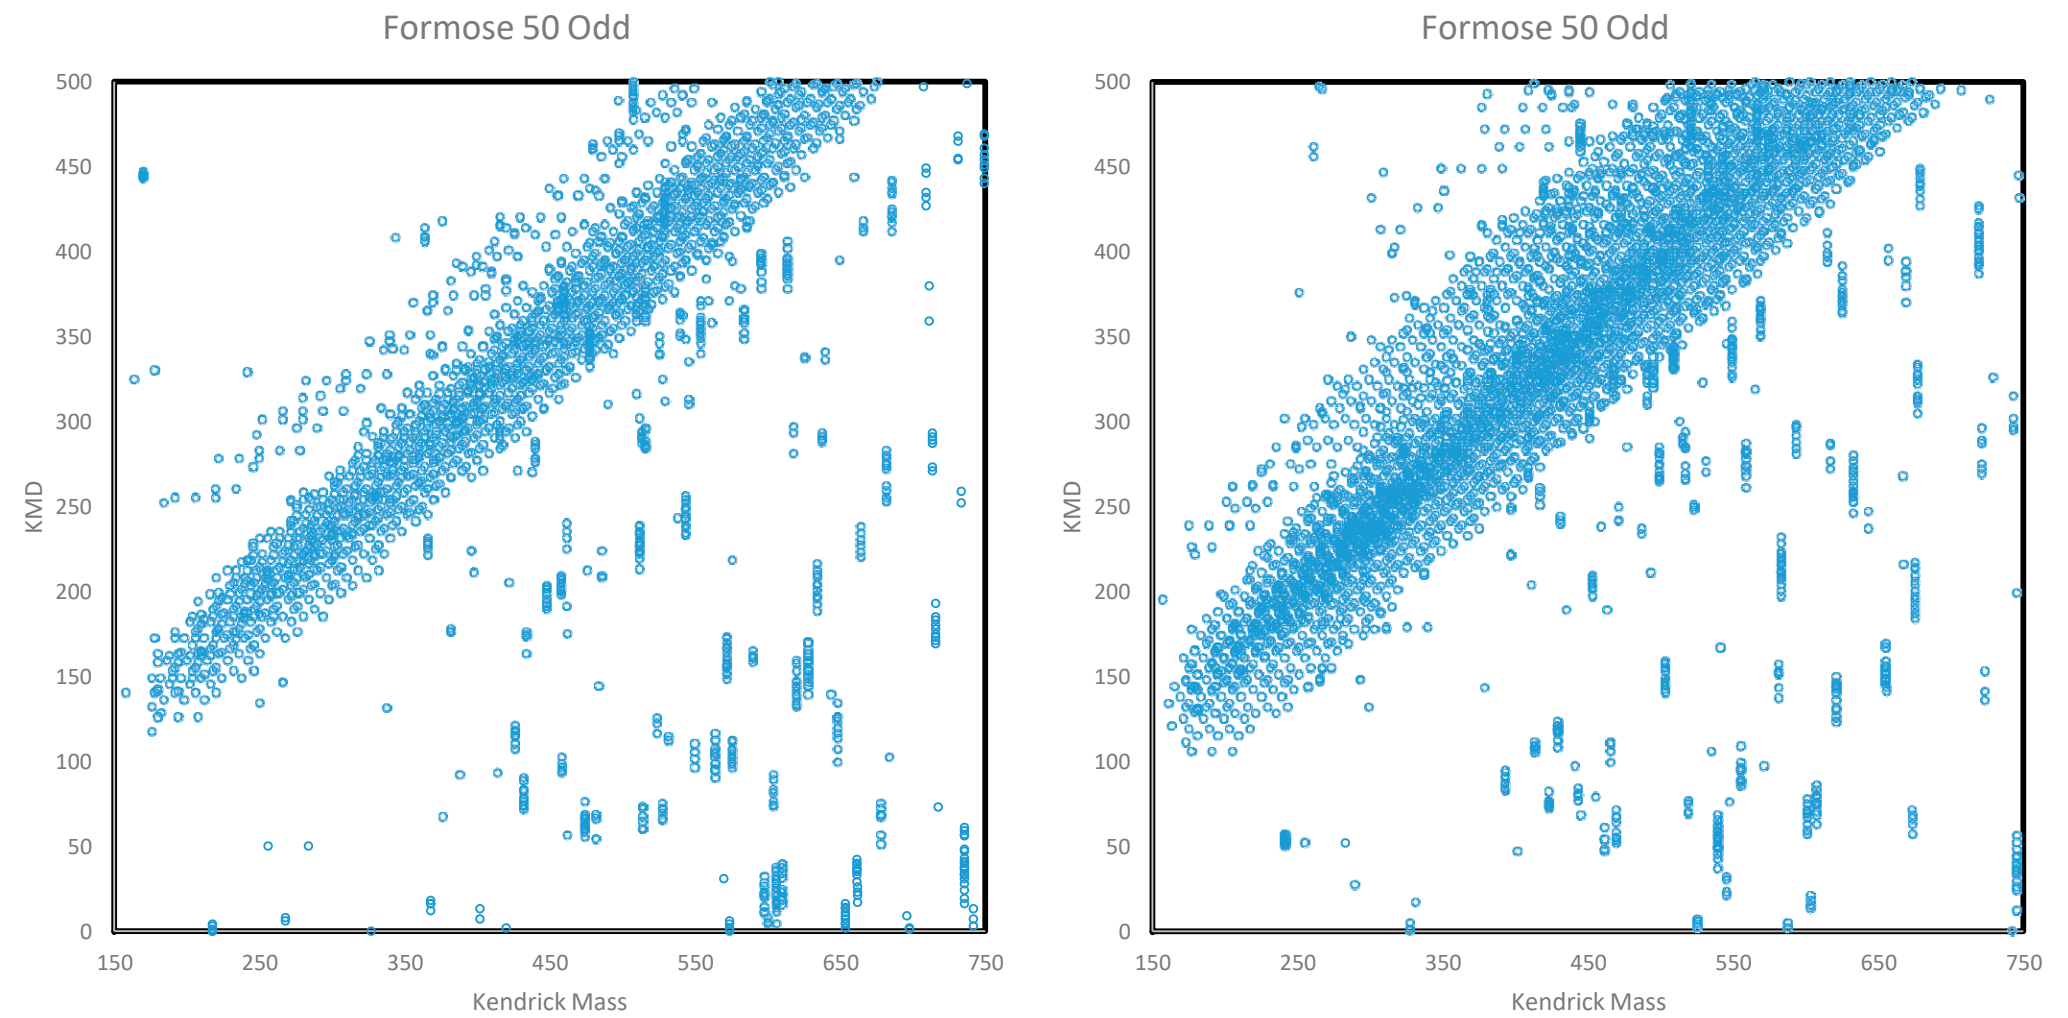

Sample 50 Formose 85° C
